# Supplementary material for: The colonization of land by animals: molecular phylogeny and divergence times among arthropods
Source: Springer Nature journal article supplement (doi:10.1186/1741-7007-2-1), 2004-01-19
Supplement: 12915_2003_3_MOESM1_ESM.doc [file 12915_2003_3_MOESM1_ESM.doc]

# Additional File 1

# Additional details of methods and sequence data.

## **Sequence collection**

Approximately 1 100 base pairs (~363 amino acids) of the coding region of the nuclear gene enolase and 890 base pairs (~294 amino acids) of the coding region of glyceraldehyde 3-phosphate dehydrogenase were sequenced in representative arthropods and outgroups.

Three overlapping pairs of degenerate primers were designed to amplify a targeted portion of the coding region of each gene based on conserved sites among sequences already available through NCBI’s Genbank (Entrez) database (http://www.ncbi.nlm.nih.gov/Entrez/). The primers were redesigned for specificity as more sequences were obtained and added to the alignments (tables A1-A2).

## Table A1 - Primers used to amplify and sequence enolase

| Primer | 5’-3’ |
| --- | --- |
| ENO1B | CGYGGCAACCCAACWGTMGAAGT |
| ENO2C | ATCCTCCCTGTACCTGCCTTCAATG |
| ENO2D | GTCCCTGCCTTCAATGTCATCAATGG |
| ENO2E | CCTGTGCCAGCATTCAATGTTAT |
| ENO3C | CATGAACTCGTGCATTGCCAGT |
| ENO4C | TATCCAGTTGTMTCYATTGAGGA |

## Table A2 - Primers used to amplify and sequence G3PDH

| Primer | 5’-3’ |
| --- | --- |
| GD3PH5-csap | GGTGTGAATCTGGAGAAGTATTC |
| GD3PH5-LPOLY | GGTGTGAACCACGAAAAGTATGATC |
| GD3PH9-MCOI | AGCTTTCCATTTAATTCTGGAATGAC |
| GD3PH9-CENTI | AGTTTCCCATTTAAGTCAGGAATGAC |
| GD3PH5-HMED | GGCGTCAACGAGAAGGAGTACAAG |
| GD3PH9-HMED | CAACTTGCCGTTGAGGACTGGGATGAC |
| GD3PH9-PHRON | AGTTTCCCATTGAGTTCTGGGATAAC |
| GD3PH5-BFLOR | GTCATGGGTGTCAACCAGGAGAAG |
| GD3PH9-BFLOR | AGCTTCCCGTTCAGCTCAGGAATGA |
| GD3PH5-MCOI | GGTGTAAACCATGACAAATACAC |
| GD3PH9-MCOI | AGCTTTCCATTTAATTCTGGAATGAC |
| GD3PH9-DDORO | CATTTTCCCATTCAATTCTGGAATAAC |

Total RNA containing messenger RNA (mRNA), ribosomal RNA (rRNA), and transfer RNA (tRNA) was extracted from the anterior body region of a centipede (*Lithobius* sp*.*), a millipede (Diplopoda sp.), a clam worm (*Nereis macrydi*), and a mollusk (*Marisa* sp.), from the leg or claw muscle of a blue crab (*Callinectes sapidus*), an Atlantic horseshoe crab (*Limulus polyphemus*), a tarantula (*Phormictopus* sp.), and a scorpion (*Centruroides* sp.), and from the combination of several whole brine shrimp (*Artemia* sp.), water fleas (*Daphnia magna*), and muscle shrimp (Ostracodasp.; possibly *Cypridopsis* sp.) using RNA Wiz (Ambion). The mRNA was reverse transcribed into complementary DNA (cDNA) using the GeneAmp RNA PCR Kit (Applied Biosystems) with oligo-dT primers downstream primers. The targeted regions were PCR amplified with TaqGold polymerase (Applied Biosystems) using annealing temperatures of 42-55 C for 35-50 cycles. The fragment was isolated and prepared for sequencing by agarose electrophoresis purification using Millipore Ultrafree-DA Filters for DNA Extraction from agarose gels. Both complementary strands were sequenced for all primer pairs. Cycle sequencing reactions were separated on a PRISM 377 Genetic Analyzer (Applied Biosystems). The newly obtained sequences were deposited in GenBank (AY522930-AY522949).

## **Table A3 -** List of genes and number of taxa considered in the preliminary analyses

|  | Genes considered in the phylogenetic analyses | | |
| --- | --- | --- | --- |
|  | Gene | Number of nucleotide positions (gaps excluded) | Number of taxa |
| Nuclear  genes | Elongation factor 1 | 828 | 36 |
| Elongation factor 2 | 1771 | 27 |
| RNA polymerase II | 362 | 37 |
| Enolase | 1078 | 18 |
| G3PDH | 541 | 16 |
| Histone 3 | 226 | 42 |
|  | 18s rRNA | 1172 | 54 |
| 28s rRNA | 152 | 46 |
| rRNA small unit 2 | 107 | 32 |
| Mitochondrial Genes | 12s rRNA | 280 | 24 |
| 16s rRNA | 683 | 24 |
| Cytochrome B | 1052 | 24 |
| Cytochrome oxidase I | 1502 | 24 |
| Cytochrome oxidase II | 651 | 24 |
| Cytochrome oxidase III | 746 | 24 |
| NADH I | 772 | 24 |
| NADH II | 653 | 24 |
| NADH III | 407 | 24 |
| NADH IV | 1003 | 24 |
| NADH IVl | 218 | 24 |
| NADH V | 1321 | 24 |
| NADH VI | 282 | 24 |
| ATPase 6 | 399 | 24 |
| ATPase 8 | 75 | 24 |

## **Accession numbers for preliminary analyses.**

Note: the accession numbers of the public database sequences selected for the final, concatenated analyses are reported directly in the alignment (see below concatenated data set).

Enolase: X17034, AF100985, NM_058073, AF025806, AF025805, AF258669, AF258668, AF258670, S80961.

G3PDH: BT004485, M11254, Z14144, XM_318655, AI770197, AJ292555, AJ289783.

Elongation factor 1- AF240861, AF240860, AF240859, AF240854, AF240847, AF240845, AF240840, U90045, AF240857, U90047, AF240839, U90051, X06869, AF063412, AF063414, U90055, D1338, AF373944, AF137392, AF240841, AF063408, AF063413, U90050, AF063410, U90046, AF063417, AF063419, AF137395, AF137394, AF137393, AF063416, AF063411.

Elongation factor 2: AF240835, AF240828, AF240823, AF240821, AF240824, AF240831, AF240819, NM_080366, X15805, AF240817, AY064104, AF240827, AF240826, AF240830, AF240822, AF240818, AF240829, AF240820, AF240815, AF240816, AF240834, AF240832, AF240825.

RNA polymerase II: AF139008, U90040, AF138990, U90041, AF138978, AF138973, AF138984, AF138987, AF138971, AF138997, AF138989, U90043, AF138996, AF138977, AF138975, U90037, AF241010, AF138993, U90044, AF139014, AF138974, AF138981, U90035, AF139017, AF139015, AF240949, AF139006, U90042, AF139001, U90039, AF139003, AF139000, AF138982, AF139011, U10331, AF138970, M27431.

18s rRNA: M21017, L81939, AF370802, L81948, AF235971, L81945, X81442, U49910, AF334271, AF173249, AF173238, AF000774, AF173263, AF173254, AF173235, AF124948, AF124938, U37003, AF005446, X77908, AF370784, U91491, U91490, AF005441, AF005438, AF005440, AF370793, AF370792, AF370791, AF370790, AF370789, AF005457, AF370788, L81934, AF144219, X01723, AF014011, AF005452, L81944, L26510, AF005451, AF005456, AF370785.

28s rRNA: AF370807, AF005468, AF370804, AF370805, AF334292, AF173280, U91493, U91492, U91503, AF062989, AF212166, AF124955, AF124966, AF173268, AF124975, X90461, X90464, AF169699, AF169703, AF304641, AF370808, AF173269, AF370809, AY125303, AF346511, AF346510, AF005469, AF173266, AF005471, AF000781, AF173267, AF370803, AF370812, AF370811.

Histone 3: AF110874, AF110860, AF110862, AF110849, AF110848, AF110859, AF370819, AF110873, AF110871, AF110870, AF370818, AF370815, AF370817, AF110868, AF110855, AF110867, AF370814, AF370813, AF110877, AF110876, AF110865, AF110857, AF110864, AF110861, AF110863, AF110852, AF110851, AF110854, AF110853, AF110850, AF110858, AF110875, AF370816, AF110856, AF110869, X81207.

rRNA small unit 2: AF370826, AF110897, AF110901, AF110886, AF370820, AF110902, AF110905, AF110904, AF370823, AF370822, AF370821, AF110892, AF110903, AF110898, AF110893, X04256, AF110888, AF110887, AF110881, AF110880, AF110879, AF110889, AF110884, AF110882, AF110883, AF110885, AF110895, AF370825, AF110906, AF110900, AF370824, AF110891.

Complete mitochondrial genomes: AF149768, NC_003081, NC_001712, NC_001709, AF081829, NC_003058, NC_002184, NC_004251, NC_000844, NC_001620, NC_003979, NC_004370, NC_003057, NC_002629, NC_003343, NC_003344, NC_003522, NC_000933, NC_003040, NC_001807, NC_002176, NC_002507, NC_001673, NC_000931.

## **Accession numbers for molecular clock analyses; rate constant proteins.**

Note:Asterisks indicate *C. intestinalis* accession numbers and refer to the DOE Joint Genome Institute *Ciona* genome database.

40s ribosomal protein 14: P14130, AAD26263, P48855, P13471, NP_012344, P55833, NP_001021, AAF56428, AAC28554.

Acotinase: A12184, NP_524708, CAB72317, P16276, AAC61778, NP_594031, CAA76360, CAB46022.

Acyl-CoA desaturase: AAF81788, AAK25796, AAB86499, AAH40384, T18228, AAK01666, AAB82294, NP_114029, Q64420.

ADP-ATP translocator: BAA23777, Q26365, AAF32322, AAL02100, AAF44332, AAC34595, NP_595323, NP_010903, NP_595238.

Beta catenin: AAL49501, NP_476666, Q02453, BAB93475, AAL49500.

Ca Binding Protein  B: EAA12855, AAB67804, 1006232A, P02636, KLSSAA, NP_112407, NP_036000.

Calreticulin: NP_031617, NP_071794, AAB20096, AAB51176, AAL68781, AAN03709, BAB79277, AAC79094, BAA85379, CAB54526.

cAMP dependent protein kinase: AAA28412, CAC00652, AAD16002, AAA60170, CAB53726.

Ca pump: O55143, NP_058986, O46674, A40812, AAB82290, P35316, CAB65295, A36691.

Chatepsin L: AAK69706, Q28944, CAA68066, EAA00330, CAD33266, CAA71554.

Chitinase: EAA04006, AAK93412, BAC06447, NP_003456, S61166.

C-nucleotide gated ion channel: AAD16099, NP_611715, NP_001289, CAB42891, S18634.

Cyclophilin G: EAA03948, NP_611695, BAA23764, P24369, NP_010590.

Cytochrome P450: NP_524598, AAL56662, AAF91384, S66472, AAL67905.

Elongation factor 1- Q01372, P16017, Q90835, P10126, AAD21853, CAA34756, AAC03154, AAF19100, AAC03150, AAK12651, AAD21851, P05303, AAC03144, AAC03146, Q26487, AAK12658, NP_652000, ci0100150109*.

Elongation factor 1- NP_524808, EAA09861, A24806, NP_001950, AAD16874, NP_588303, NP_009398.

Elongation factor 1- Q9D8N0, NP_001395, P12261, AAL78751, EAA12078, BAB21108, NP_012842.

Elongation factor 2: AAK49353, NP_587863, O13430, Q90705, AAK12346, P58252, AAK12359, AAK12347, AAK12343, AAL85605, AAK12348, AAK12351, P13060, AAK12340, ci0100145063*.

Enolase: NP_001419, Q9XSJ4, XP_109407, P19140, AAF72639, P51913, AAB87891, AAB87890, AAK54787, P00924, NP_595903, AAK54805, ci0100151116*.

G protein  Q: P82471, Q28294, NP_523718, AAL93221, P91950, AAB48510, AAM18375, O74227, Q00743.

G protein S: RGMSA1, NP_536351, BAA81693, NP_477506, O16118.

G protein  subunit 1: EAA11641, NP_525090, O45040, NP_032168, AAN33051, AAD03596, AAC33436.

G3PDH: NP_595236, EAA13849, B22366, Q01597, NP_032110, A22366, O44104, O44105, O57479, P10096, BAA90818, P00356, NP_002037, CAB94909, ci0100132109*.

Gelsolin: NP_000168, P13020, NP_524865, EAA13073, Q27319, CAC87029.

Glutathione peroxidase: NP_523463, EAA04146, AAK97814, AAC84043, NP_004896, P34227.

GTP: CAB65311, CAB85964, P20007, A45746, JQ1462.

Initiation factor 2A: EAA05222, NP_573130, 1710307A, NP_004085, NP_062229, NP_594081, NP_012540.

Integrin subunit B: CAC00630, NP_524793, CAA67357, NP_002202, P07228, AAF35883, AAG25994.

K+/Na++ dependent ATPase: P04074, 1210234A, AAL18002, AAG47843, NP_732572, AAK62046, AAK54644, CAB56173, T43025, AAN17736, EAA07474.

Myosine III: T31109, NP_523503, NP_059129, NP_680779, NP_593816.

P70 s6k: AAG48248, NP_523941, S12906, P23443, CAB89082, NP_187484.

Paramyosin: NP_523982, EAA09724, AAM83103, AAK01181, AAO20875, AAD09454, AAA37159, S30782.

Peroxiriductase: BAB17604, NP_523463, AAC63376, AAC84043, P34227.

Myosin II-HC: AAM97639, AAM97641, AAM97634, AAM97640, AM97638,

BAA82144, AAM97637, AAM97636, AAM97635.

NHE2: P48763, NP_724311, AAC26968, AAG38538, NP_010744.

P21: NP_113703, NP_067259, NP_004976, P08642, EAA03664, NP_476699, A43640, AAK14389, AAB07703.

PGI: AAK57982, AAG15513, NP_032181, Q9N1E2, NP_596635, Q9HGZ2.

Phospholipase C: O13433, A53766, NP_077329, P13217, NP_594734.

Reverse transcriptase: AAD16096, T30935, CAC85650, AAC51261.

Ribosomal protein 2: NP_080296, NP_000995, R8SS12, Q9UUZ6, AAG33243, P02401, CAA70259.

Ribosomal protein S18: AAK92187, AAG47944, NP_035426, NP_588056, NP_010738.

RNA polymerase II: NP_010141, NP_595673, AAF26666, AAB58418, I38186, AAC83397, AAC03142, AAF26639, AAF26661, F26637, F26665, AC03134, AAF26625, AAF26667, AAF26628, AAC03140, AAF26650, AAC03136, AAK12725, AAF26646, AAC03141, AAF26657, AAK11926, ci0100146994*.

Serum response protein: CAB62047, EAA09941, Q24535, NP_003122, NP_065239, AAK81817.

Shaker 1: AAC05909, NP_728123, I57680, P16388, AAB02603.

Shal 1: AAA81592, NP_524159, NP_036413, NP_062671, AAL56633, AAB39750.

TBP: NP_523805, O45211, P53361, EAA05430, O17488, 2119243A, O13270, NP_038712, AAA79367.

Tropomyosin: P58773, AAA48610, BAC10577, Q25456, Q9NFZ4, CAB55601, P39921.

Vacuolar ATPase C: P55277, P31403, AAF57359, AAG17394, Q26250, P23956, P25515.

Wee1-like kinase: CAB99477, CAB72316, EAA12306, AAA86277, AAN07091, CAB91112, NP_587933.

*Accession numbers for molecular clock analyses; rate heterogeneous proteins.*

5' nucleosidase: AAD32190, AAB38963, NP_002517, CAC21408.

60s ribosomal protein L15: EAA10485, P30736, NP_652103, Q9XYC2, AAG44837, NP_079862, NP_013129, CAD21192.

Alpha tubulin: Q25008, AAC47522, AAK58683, AAC78846, CAD20979, NP_035783, 0812252A, P53372.

Beta 1,4 endoglucanase: BAB40697, BAB40696, BAA33709, AAD38027, AAM81967, BAC04648.

Carboxipeptidase B: P04069, EAA06398, NP_036665, AAB68600.

Deoxiribonuclease I: CAB55635, EAA00083, NP_005098, P81204.

Frequenin: NP_592879, BAB88922, NP_062655, AAF01804, AAF74284, NP_525093.

Ionotropic glutamate receptor subunit: AAM47017, P22756, EAA13931, NP_000821, NP_608863, NP_174978.

NA/K/CL cotransporter: NP_648572, EAA00828, AAF05702, NP_033220, NP_113986, NP_001037, T01896, NP_174333.

RXR 1: AAF73057, AAF00981, AAC32789, AAC15588, NP_036937, NP_035435, NP_002948, AAC80008.

Troponin C: 1508214A, CAA53627, P29289, AAC04873, P02585, E64706.

Vacuolar ATP synthase subunit B: B44138, AAF73735, P31410, P31401, EAA08175, NP_009685, NP_476908, AAC04806, AAF08281, P22550.

## **Concatenated data Set (in Nexus Format)**

#NEXUS

[TITLE: CONCATENATED NUCLEAR AND MITOCHONDRIAL GENES]

begin data;

dimensions ntax=8 nchar=21313;

format interleave datatype=nucleotide gap=- missing=?;

matrix

[NUCLEAR GENES]

[ef1 nchar=1092]

Annelida [AB003717] TTGGACAAGCTGAAGGCTGAGAGAGAAAGAGGTATCACCA

TCGATATCTCCCTGTGGAAGTTCGAAACTGCCAAGTACTACGTCACCATCATCGATGCCCCCGGACATC

GTGATTTCATCAAGAACATGATCACTGGTACCTCCCAGGCTGATTGTGCCGTCTTGATTGTTGCTGCTG

GTGTCGGTGAGTTCGAGGCTGGTATCTCCAAGAACGGACAGACCCGTGAACATGCCCTGCTTGCTTACA

CCCTCGGTGTCAAGCAAATGATCATTGGTGTCAACAAGATGGACTCCACCGAGCCACCATACAGCGAGG

CCAGATTCGAGGAAATCAAGAAGGAAGTCGCCACCTACATCAAGAAGGTCGGATACAACCCAGACACTG

TTGCCTTCGTCCCAATCTCAGGATGGAACGGTGACAACATGTTGGAGACCAGCCCCAAGATGGGATGGT

TCAAGGGATGGAGTGTGAAGAGAGGAGAAAAGACCACCTCTGGTACCACCATGATTGAGGCCCTTGACA

ACATTGAGCCACCAAAGAGGCCAACTGACAAGCCTCTTCGTCTGCCACTCCAGGATGTCTACAAGATAG

GAGGTATCGGAACTGTGCCAGTCGGTCGTGTTGAGACCGGAACCCTCAAGGCTGGAACCGTCGTCACCT

TTGCTCCATCAAACTTGAGCACTGAAGTCAAGTCCGTTGAAATGCATCACCAGACTTTGGAGGAGGCTT

TCCCCGGTGACAACGTCGGTTTCAACATCAAGAACGTTTCAGTCAAAGACATCCGTCGTGGTAATGTGT

GCGGTGACTCCAAGAACGACCCACCCAGGGAGACTGAGGAGTTCAAGGCTCAGGTCATCATCATGAACC

ACCCTGGTCAGATCAGTGCTGGATATGCTCCAGTTGTTGATTGCCACACTGCCCACATTGCCTGCAAGT

TCAGGGAGTTGTTGGAGAAGATTGATCGTCGTAGCGGTAAGAAGATTGAAGACAACCCTGCCCATGTSA

AGGCTGGTGATGCTGCCATCGTCAACATGGTTCCACAGAAGCCAATGTGCGTTGAGTCCTTCGTCGAGT

ATCCTCCT---------

Arachnida [U90047] TTGGACAAGCTGAAGGCTGAGCGGGAACGTGGTATCACCA

TTGACATCACCTTGTGGAAGTTCGAGACATCGAAGTACTATGTCACTGTCATTGACGCTCCTGGCCACA

GAGATTTCATCAAGAACATGATTACAGGAACCTCGCAGGCCGATTGTGCTGTCCTGATTGTGGCTGCAG

GTACTGGTGAGTTTGAGGCTGGTATCTCCAAGAACGGACAGACCAGAGAACACGCTCTGCTTGCCTACA

CCTTGGGTGTCAAGCAGATGATTGTTGGTGTCAACAAGATGGACACCACTGAACCACCATTCAGTGAGT

CTCGATTTGAGGAAATCAAGAAGGAAGTATCCGCTTACATCAAGAAGATTGGTTACAACCCTGCCACCG

TACCTTTTGTTCCCATTTCCGGCTGGAACGGTGACAACATGTTGGAGCCCAGCACCAACATGCCGTGGT

ACAAGGGATGGAACATCGAACGCAAGAGTGGAAAGAATGACGGCAAGACCTTGTTGCAAGCTTTGGATG

CCATGGAGCCACCCTCCAGGCCTTTGGACAAACCTCTTAGATTGCCCCTCCAGGATGTCTACAAAATCG

GAGGTATTGGAACTGTCCCAGTCGGCAGAGTGGAAACTGGTGTCATGAAACCTGGTATGGTCGTCACCT

TTGCTCCAGTTAACATCACCACTGAAGTAAAATCTGTGGAAATGCATCATGAAGCTCTTACTGAGGCTG

TTCCCGGAGACAACGTTGGTTTCAACGTGAAGAACGTGTCCGTCAAGGAACTTCGTCGTGGTTACGTGT

GTGGAGACAGCAAGGACACTGCTCCCAAAGCCACTGAAGAATTCACTGCCCAGGTCATTGTCCTCAACC

ACCCTGGACAAATCTCGAATGGATACACCCCAGTCTTGGATTGCCACACCGCTCACATTGCCTGCAAGT

TCAGGGAGATCAAGGAGAAGTGCGATCGTCGTACTGGCAAGAAGTTGGAAGATAACCCCAAGTTCATCA

AGTCTGGAGATGCTGCCATTGTTGACCTGGCTCCAAGCAAGCCCATGTGTGTTGAAACCTTCACTGATT

TCCCCCCGTTGGGTCGT

Branchiopoda [AF063412] TTGGACAAGCTTAAGGCCGAGCGCGAACGTGGTATCACCA

TTGATATCGCCCTGTGGAAGTTCGAGACGGCCAAGTACTACGTGACCATCATCGATGCCCCCGGACATC

GTGACTTCATCAAGAACATGATTACCGGTACCTCGCAGGCTGACTGCGCTGTGCTCATCGTTGCCGCTG

GTGTGGGTGAATTCGAAGCCGGTATCTCCAAGAACGGCCAGACCCGTGAGCACGCCCTGCTCGCCTACA

CCCTGGGTGTTAAGCAGCTCATCGTCGGTGTCAACAAGATGGACTCGACCGAGCCCCCCTACAGCGAGG

CCCGTTTCGAGGAAATCAAGAAGGAAGTCAGCAGCTACATCAAGAAGATCGGTTACAACCCCGTTGCTG

TCCCCTTCGTCCCCATCTCCGGATGGCACGGAGACAACATGTTGGAGGCCTCCACCAACCTCCCCTGGT

ACAAGGGATGGGCCATCGAGCGCAAAGAAGGCAAGGCTGACGGCAAGACCCTCATCGATGCCCTCGACG

CCATCCTGCCCCCTTCCCGCCCCACCGAGAAGCCCCTGCGTCTTCCCCTGCAGGACGTCTACAAGATCG

GTGGTATCGGTACCGTGCCCGTTGGCCGTGTCGAGACTGGTGTCATCAAGCCCGGCACTGTCGTCACTT

TCGCCCCCTGCAACTTGACCACTGAAGTCAAGTCCGTTGAGATGCACCACGAAGCTCTCGAGGAGGCCG

TCCCCGGAGACAACGTTGGCTTCAACGTCAAGAACGTTTCCGTCAAGGAACTCCGCCGTGGCTACGTTG

CTGGAGACTCCAAGAACAACCCTCCCAAGGGAGCCGCTGACTTCTACGCCCAGGTCATCGTCTTGAACC

ACCCTGGTCAGATCAGCAACGGTTACACTCCCGTGCTGGACTGCCACACTGCCCACATCGCTTGCAAGT

TCGCCGAGATCAAGGAGAAGTGCGACCGTCGTACCGGCAAGACCACCGAAGAGAACCCCAAGTTCATCA

AGTCCGGAGACGCCGCCATGATCACCCTGGTCCCCTCGAAGCCTCTGTGCGTCGAGTCCTTCTCCGACT

TCCCCCCCTTGGGTCGC

Chilopoda [AF137393] TTGGACAAATTGAAAGCTGAGCGTGAACGTGGTATTACTA

TTGATATTTCTCTCTGGAAGTTTGAAACCCCTAAATATTACATTACCATTATTGATGCTCCTGGACATC

GTGATTTCATTAAAAACATGATCACTGGCACGTCTCAAGCTGACTGTGCTGTATTGATTGTAGCTGCTG

GTACTGGAGAATTTGAAGCAGGTATCTCGAAAAATGGCCAGACCCGAGAGCATGCTCTCTTAGCTTACA

CTTTAGGTGTAAAGCAGTTGATTGTTGGTGTGAACAAAATGGATTCCACTGAACCCCCCTACAGTCAAG

CTCGATTCGAAGAAATCCAGAAAGAAGTCAGCAGCTACATTAAGAAAATTGGTTACAACCCAGCTTCAG

TTCCATTTGTTCCCATTTCTGGTTGGAATGGAGATAACATGTTGGATGCTAGTGCAAACATGACCTGGC

ACAAGGGATGGGAAATCGAGCGTAAAGAAGGTAAAGCTTCTGGAAAAACCCTCTTGGAAGCTTTGGACT

CAATCATTCCTCCTACAAGACCTACTGACAAGCCTCTGCGTCTTCCTTTGCAAGATGTCTACAAAATTG

GTGGTATTGGCACAGTACCAGTAGGCAGAGTTGAAACTGGTGTCTTGAAACCTGGTATGGTAGTAACAT

TTGCTCCAGTCAATCTGACCACTGAAGTTAAGTCAGTCGAAATGCACCACGAAGCCCTGCAAGAAGCTG

TGCCTGGAGACAATGTTGGCTTCAATGTAAAAAACGTTTCTGTGAAAGAACTTCGCCGAGGGTATGTTG

CAGGAGATAGCAAGAACAATCCTCCCAAGGCTGTATCAGATTTCACTGCTCAAGTCATTGTCTTGAACC

ACCCTGGACAAATCTCCAATGGTTACACCCCAGTTTTGGACTGCCACACAGCCCACATTGCTTGCAAAT

TTGCTGAAATCAAAGAAAAATGTGATCGCCGTACAGGTAAAACTGTTGAAGAGAACCCCAAAAGCATAA

AATCAGGAGATGCAGCCATTGTTAATCTTATTCCTTCAAAACCTATGTGTGTTGAATCCTTCTCTGACT

TCCCTCCTCTGGGTCGT

Diplopoda [U90055] TTGGACAAACTGAAGGCGGAACGTGAACGTGGTATTACCA

TCGATATCTCCCTGTGGAAATTCGAGACACCCAAGTTTTACATTACCATCATTGATGCCCCCGGGCACA

GAGATTTCATCAAAAACATGATTACCGGGACTTCACAGGCCGATTGTGCCGTGTTGATTGTGGCTGCTG

GTACCGGTGAATTCGAAGCCGGTATCTCCAAAAACGGACAAACCAGNGAGCACGCTCTGTTGGCGTACA

CCCTGGGTGTCAAGCAACTGATTGTCGGGGTCAACAAAATGGACACCACTGAGCCCCCTTACAGCGAGC

CTCGATTTGATGAAATCAAGAAGGAAGTAAGTAATTACATCAAGAAGATCGGTTATAACCCGGCTGCGG

TCGCTTTTGTGCCGATCTCTGGCTGGAATGGTGACAACATGCTGGAGCCAAGTCCGAACATGACCTGGC

ACAAGGGCTGGGCGATTGAGCGAAAAGAAGGAAACTCCAGCGGCAAGACCCTGCTGGAAGCTCTGGACG

CCATCATCCCACCCCAGCGCCCCACGGACAAGGCCCTCAGATTACCCCTCCAGGACGTCTACAAGATTG

GAGGTATTGGAACTGTGCCCGTCGGCCGAGTGGAGACCGGTCTGTTGAAACCCGGCATGGTGGTGACGT

TTGCCCCTACCAACCTGACNACTGAGGTGAAGTCNGTGGAGATGCACCACGAGGCCCTCACGGAGGCCG

TGCCCGGCGACAACGTCGGCTTCAACGTCAAGAACGTGTCCGTCAAGGAGCTGCGCCGTGGCTACGTCT

GCGGAGACAGCAAAAATAACCCGCCAAAGGCCGTGTCCGAATTCACTGCCCAGGTCATTGTCCTGAACC

ACCCCGGCCAAATCTCGAACGGCTACACGCCCGTGCTCGACTGCCACACGGCTCACATCGCCTGCAAGT

TCGCCGAGATCAAGGAGAAGTGCGACCGCCGTACCGGCAAAACCGTTGAGGAGAACCCCAAGGCCATCA

AGTCGGGAGACGCGGCCATCATCGCCCTGGTGCCGACCAAGCCCCTGTGCGTCGAGAGCTTCAGCGACT

TCCCTCCCCTNGGTCGC

Hexapoda [AF373944] TTGGACAAACTAAAGGCCGAGCGTGAGCGTGGTATCACCA

TCGACATTGCCCTCTGGAAGTTCGAAACCGGCAAATACTATGTCACCATCATCGACGCTCCTGGACACA

GAGATTTCATCAAGAACATGATCACTGGAACGTCTCAAGCTGACTGCGCCGTGCTTATTGTCGCCGCTG

GTACTGGTGAATTCGAAGCCGGTATCTCAAAGAACGGACAAACGCGTGAACACGCTCTGCTCGCTTTCA

CACTCGGAGTCAAGCAACTGATTGTAGGAGTGAACAAAATGGACTCCACTGAGCCACCATACAGCGAGT

CTCGATTTGAGGAAATCAAGAAGGAAGTCTCTTCCTACATCAAGAAAATTGGTTACAATCCGGCTGCCG

TCGCTTTCGTACCCATTTCTGGCTGGCACGGAGATAACATGTTGGAGCCTTCCACCAAAATGCCATGGT

TCAAGGGATGGTTGGTTGAGCGTAAAGAAGGAAAGGCTGAAGGTAAATGTCTTATTGAGGCCCTCGACG

CCATCCTTCCTCCTGCTCGCCCCACTGACAAGGCTCTCCGTCTTCCCCTGCAGGATGTATACAAAATCG

GCGGTATTGGAACAGTACCCGTAGGTAGAGTTGAAACTGGTATCCTAAAGCCTGGTACTGTTGTCGTTT

TTGCCCCTGCCAACATCACTACTGAAGTCAAGTCCGTGGAAATGCATCATGAGGCTCTACAAGAAGCTG

TACCCGGTGACAATGTTGGTTTCAACGTCAAAAACGTATCTGTCAAGGAATTGCGCCGTGGTTACGTTG

CAGGAGATTCGAAAAACAACCCACCCAGGGGAGCTGCAGACTTCACAGCGCAAGTCATTGTGCTAAACC

ACCCAGGTCAAATATCAAACGGCTACACACCTGTATTGGATTGCCACACAGCTCACATAGCGTGCAAAT

TTGCCGAAATCAAAGAGAAAGTCGACCGTCGTACTGGTAAATCAACAGAGGACAACCCTAAATCCATTA

AATCTGGTGATGCCGCCATTGTCAACCTGGTTCCCTCCAAGCCCCTGTGTGTGGAGTCCTTCCAGGAAT

TCCCACCCCTCGGTCGT

Malacostraca [U90046] CTTGACAAATTGAAAGCCGAACGTGAACGTGGTATTACCA

TCGATATTGCCCTTTGGAAATTCGAAACTAACAGATTTTATGTAACAATCATTGACGCTCCAGGGCACA

GAGATTTCATCAAGAACATGATCACAGGAACATCTCAAGCCGATTGTGCTGTGCTTATCGTTGCTGCAG

GTACTGGTGAATTCGAAGCTGGTATCTCAAAGAATGGTCAGACTCGTGAACACGTACTTTTATGTTTCA

CTCTTGGTGTCAAACAACTTATCGTCGCTGTCAACAAGATGGACTCCACAGAACCTAAATATTCCGAAG

ATAGGTTTAATGAAATCAAAAAAGAAGTTAGTGCTTATGTAAAGAAAGTAGGATACAACCCTACTGTCG

TCCCAGTCATTCCAATCTCTGGTTTCAATGGTGACAACATGCTTGAGAAGTCAGACAACATGCCATGGT

GGAAGAAGACCAAGGTTGAAAGAAAGTCTGGCAATTATGAATTCGAAACCCTCTTTGATGCCCTTGACA

ACATCGAACCTCCAACCAGACCTCTAGACAAAGCNCTTAGACTTCCCTTACAGGATGTGTACAAAATTG

GTGGTATTGGAACAGTCCCTGTTGGTCGTGTNGAAACTGGTATTCTTAAACCCGGTATGGTTGTAACNT

TTGCTCCAACTGGTGTTACTACTGAAGTTAAATCCGTAGAAATGCATCACGAAGCCCTTACTGAAGCTG

TTCCAGGAGACAACGTTGGTTTCAACGTAAAGAACGTTGCCGTTAAAGATCTTAAGAGAGGTTTCGTTG

CTTCAGACTCCAAGAACGACCCAGCCAAAGAAGTTCAAGATTTCATCGCTCAGGTTATCGTGCTCAATC

ACCCTGGTCAAATCCAAGCTGGATATTCTCCTGTCTTAGATTGTCATACCGCGCATATTGCCTGTAAAT

TTGCCGAACTCCAGACCAAAATTGACAGAAGAACTGGTAAGGAATTAGAAGCTGGACCTAAATTCGTCA

AATCTGGCGATTCTTGCATCGTAAAAATGGTTCCCAGCAAACCCATGTGCGTCGAATCATTCCAGAAAT

ATCCACCTCTTGGACGT

Xiphosura [U90051] TTGGACAAACTGAAGGCCGAGCGTGAACGTGGTATTACCA

TTGACATCACCCTGTGGAAGTTTGAGACTCCAAAGTACTACGTCACTGTTATTGATGCTCCGGGACATC

GTGATTTCATTAAAAATATGATTACTGGAACATCCCAGGCTGATTGTGCTGTTCTGATTGTGGCTGCTG

GCACTGGTGAATTTGAAGCTGGAATTTCCAAAAATGGCCAGACCCGTGAACACGCCTTGTTGGCCTACA

CCCTGGGTGTGAAGCAGATGATTGTGGGAGTGAACAAGATGGACACAACTGAACCTCCTTATAGTGAGA

AACGTTTTGAAGAAATCCAGAAGGAAGTTAGTGCCTACATTAAGAAGATAGGCTACAATCCTGCCACTG

TTGCCTTTGTGCCAATCTCTGGGTGGAATGGTGACAATATGCTGGAAGCCAGCCCTAACACTCCATGGT

TTAAGGGGTTTAAAATTGAACGCAAGGGTCAAACAACTGAAGGCAAGACTCTCTTGCAAGCTTTGGACT

GTGCTGAACCTCCATCTCGTCCCACTGACAAGCCTCTTCGTCTGCCTCTGCAGGATGTCTACAAAATTG

GAGGTATTGGTACTGTACCTGTTGGTAGAGTTGAAACTGGTGTNTTGAAACCTGGCACCGTGGTTACCT

TTGCCCCTGCTATGATCACCACCGAAGTAAAGTCTGTTGAAATGCACCACGAATCTCTAAGTGAGGCTG

TTCCAGGTGACAACGTTGGTTTTAACGTAAAAAATGTTTCTGTGAAGGAACTTCGTCGTGGGTACGTAG

CAGGAGATAGTAAAAATGATCCTCCCCAGGCCACGGCTGATTTTACTGCTCAAGTTATCATTCTCAACC

ATCCTGGTCAGATCACCAATGGTTACGCTCCAGTTTTGGATTGCCACACAGCCCATATTGCATGCAAGT

TCAAGGAGATCAAGGAGAAATGTGACAGNCGTAGCGGAAAGAAACTTGAAGATAATCCCAAGTTCATTA

AGTCTGGTGATGCAGCTATCGTGGAGTTGGTTCCAACTAAGCCTATGTGTGTGGAATCATTCACAAACT

ACCCTCCTCTGGGTCGC

[ef2 nchar=1906]

Annelida [AF240834] ATCTACACTGACTGACTCCCTTGTCAGTAAAGCTGGTATC

ATCGCTGGTTCCAGAGCAGGCGAGACTCGGTTTACAGACACCAGGAAAGATGAGCAGGAGAGATGTATC

ACCATCAAGTCCACTGCCATCTCCCTCTACTACACCATGACCGAGAAGGATTGCTCATACATCCTCCAA

GAGAAG------GAAGAGGGTCTCACTTCCTTCTTGATCAACTTGATTGATTCTCCCGGCCACGTCGAT

TTCTCTTCTGAGGTGACAGCTGCCCTGCGTGTCACTGACGGAGCCCTTGTTGTGGTGGATTGTGTGTCT

GGTGTCTGTGTGCAGACTGAGACTGTGCTGAGACAGGCCATTGCTGAGCGCATCAAGCCTGTTCTCTTC

ATGAACAAGATGGACTTGGCTCTTCTTACCCTCCAGTTGGATGCTGAATCTTTGTATCAGACTTTCTGC

CGTATTGTTGAGAGCGTCAACGTAATCATTGCCACATACAGTGAAGATGGTGGCCCCATGGGAGATATT

ATGGTTGACCCTGCTAAGGGAACAGTAGGCTTTGGATCTGGACTTCACGGCTGGGCTTTCACCTTGAAG

CAGTTTGCTGAGTTGTATGCATCAAAGTTCAAGATTGAAGAAACCAAACTGATGAAGAGATTGTGGGGT

GATCAGTTCTACCATCCCAAAGATAAGAAATGGTCCAAGGAT------AGCGGCGAGGGCTTCGTGCGT

GGTTTCACCCAGTACATCTTGGACCCTATCTACAAGATCTTCCATTTCTGCATGAACAAGACCAAGGAA

GAGGCTTTGGCTCTGATTGAAAAGGTTGGAGTGAAGCTGACATTCGAGGACAAGGAATTGGTTGGCAAG

CCCCTGTTGAAGACCGTGATGAGAAAGTGGCTGCCTGCTGGTGAGGCTTTGCTTCAGATGATTGCCATC

CATTTACCATCACCTGTCACTGCCCAGAAATACAGAATGGAGCTGCTCTATGAAGGTCCTTTTGATGAT

GAGGCTGCTGTTGCCGTCAAGGCTTGCGACTCCAAGGGACCCGTCATGATGTACATCTCCAAGATGGTA

CCCACAACTGATAAGGGACGTTTCTACGCCTTTGGACGTGTATTTGCTGGATGTGTGGCCACTGGACAG

AAGGTGCGCATCATGGGACCCAACTACACCCCAGGAAAGAGGGAAGATCTTTACCTGAAGAGTATCCAG

AGAACCATCCTCATGATGGGTCGTTATGTTGAGCCAATTGAAGATGTCCCATGCGGTAACATCTGTGGT

CTTGTTGGTGTTGACCAGTTCTTGGTTAAGACTGGTACCATCTCTACCTTCGAACATGCCCACAACATG

AAGGTGATGAAGTTCTCCGTCAGCCCTGTTGTGCGAGTTGCTGTTGAGTGCAAGAACCCATCTGATCTT

CCCAAGCTTGTAGAAGGTTTGAAGCGTCTGGCTAAATCTGATCCTATGGTACAGTGTATCATTGAGGAA

TCTGGAGAGCACATCATTGCTGGTGCTGGAGAATTGCACTTGGAAATCTGCTTGAAGGATCTGGAAGAA

GACCATGCTGGTATCCCTCTCAAGAAATCTGAACCTGTTGTGTCATATCGTGAAACCGTAGCCGAAGAA

TCCGACAGAATGTGCCTGTCCAAGTCTCCCAATAAACACAACAGATTATTCATGAGGGCCAGACCCTTG

CCTGATGAACTCGCCACTGACATTGAAGATGGAAAAGTCACCCCCAGACAGGAGATGAAGGAGCGTGCC

CGTTATTTGGCAGATACCTATGAATTTGACGTCACAGAGGCCCGTAAGATCTGGTGCTTTGGTCCTGAT

GGAACTGGTGCTAACCTCGTTATTGACTGCACAAAGGGAGTGCAGTATTTGAATGAAATCAAGGACAGT

GTA

Arachnida [AF240824] GTCTACGCTCACAGACTCCCTCGTCTCTAAAGCTGGAATT

ATTGCAGCGGCAAAAGCTGGAGAGATGAGGTTCACTGATACTCGTAAAGATGAACAGGAACGTTGTATT

ACAATCAAATCTACCGCCCTTTCGATGTACTTCGAGCTGGAAGACAAGGATGTAGTCTTCATCAAGGAA

GAAGCCCAGAGAGAAAAAGGCGTTAATGGATTTTTAATTAATTTGATTGATTCTCCTGGCCACGTTGAT

TTCTCCTCTGAAGTTACCGCTGCCTTACGTGTCACAGATGGAGCTCTTGTTGTTGTTGATTGTGTCAGT

GGTGTCTGCGTGCAAACCGAAACTGTCTTAAGACAGGCTATTGCCGAGCGTATTAAGCCTGTGCTTTTT

ATGAACAAGATGGATTTGGCTCTGTTAACTCTTCAACTAGAGCAGGAAGACTTATACCAGACTTTCCAG

CGAATCATTGAAAATACCAATGTTATTATTTCTACGTACAGCGATGAAACTGGACCCATGGGTGATATT

AGGGTTGACCCTTCTAAAGGAAGTGTTGGCTTTGGATCCGGACTACACAGCTGGGCTTTCACCCTGAAA

CAATTTTCCGAAATCTACGCTGAGAAATTCAAGATCGATGTTGAGAAACTCATGAACCGATTGTGGGGA

GAGAACTTTTACAATCCCCAATCCAAGAAGTGGTCCAAGAAG------ATGGACGAAGGCTTTAAACGT

GCTTTCTGCATGTTCGTTTTAGACCCTATTTATAAAATTTTCAAGGCAATTATGGGCTACCAGAAAGAA

GAGACAGCCAAGCTTTTAGAAAAGCTAAACATTATTCTGAAGGGTGACGACAAGGAGAAAGATGGCAAG

AACCTGCTCAAGGTTGTGATGCGTAACTGGCTCCCAGCCGGTGATGCTCTTCTTCAAATGATAGCCATC

CATTTGCCGTCTCCTGTTACGGCCCAGAGATACAGAATCGATCTGCTGTATGAAGGTCCTCAAGATGAT

GAAGCTGCCGTCGCCATGAAATCCTGCGACCCAGATGGCCCTCTTATGATGTACATCTCCAAGATGGTA

CCGACCTCTGATAAAGGTCGATTTTATGCCTTTGGCCGAGTGTTTTCCGGAATAGTATCTTCGGGACAG

AAAGTTCGCATTATGGGACCCAACTATTTGCCTGGCAAGAAAGACGATTTGGCCGAAAAAGCCATTCAA

AGAACTGTATTGATGATGGGTCGTGCTGTTGAGCCCATTGAAAATGTGCCATCCGGTAATATCTGCGGT

TTGGTTGGTGTTGATCAGTTTTTGGTTAAAACTGGAACCATCTCTACATTCAAGGATGCCCACAACATG

AGGGTGATGAAATTCTCAGTTAGCCCTGTCGTGAGAGTAGCTGTTGAGCCAATGAATCCATCTGATCTG

CCAAAGCTGGTAGAAGGATTAAAACGACTGGCTAAGTCCGATCCTATGGTGCAGTGCATCATTGAAGAA

TCGGGCGAGCATATTGTAGCTGGAGCTGGCGAACTCCATCTTGAGATCTGCCTAAAGGATTTGGAAGAA

GACCACGCTGGCATTCCTTTGAAGAAAACTGACCCAGTAGTCACTTACCGAGAGACGGTTGCTGAAGAA

TCGGCGATCATGTGCCTCTCCAAGTCTCCCAACAAGCACAACCGTCTATACATGAAGGCGACGCCTATG

CAAGATGGCCTCCCGGAAGATATTGATTCTGGTGCAGTTAATCCCAAGGATGATTTTAAGGCTCGAGGC

CGTTATCTGTCTGATAAGTATGAATGGGACGCAACCGAAGCCCGTAAGATCTGGTGCTTTGGACCTGAA

GGAACTGGGCCTAATTTGCTCGTTGATGTGACCAAGGGTGTACAATACCTGAATGAAATCAAGGACAGC

GTT

Branchiopoda [AF240815] ATCAACCCTGACTGATTCTCTTGTGGGTAAAGCTGGTATC

ATAGCTGGCTCAAAGGCTGGAGAAACTCGATTTACTGATACCCGTAAAGATGAACAAGAAAGATGTATT

ACTATCAAGTCAACTGCCATCAGCATGTATTTTGAACTTGATGATAAAGACACTGTATTCATTACCCAA

GAGACACAAAGAGAGAAAGAAACAAAAGGATTCTTGATCAATTTGATTGACTCTCCAGGTCACGTAGAT

TTTTCATCTGAAGTTACTGCTGCACTTCGAGTTACAGATGGTGCCCTTGTTGTGGTTGATTGTGTATCA

GGTGTGTGCGTTCAAACTGAAACCGTACTCAGACAAGCTATTGCTGAGCGAATTAAGCCAGTTCTGTTC

ATGAATAAAATGGACCGTGCCCTTCTCGAACTGCAGTTAGAACAGGAAGAATTGTACCAAACTTTTTCT

AGAATTGTTGAAAACGTCAACGTGATTATTGCCACTTATGCTGATGATGAAGGTCCAATGGGCTCCATT

AGTGTAGATCCCAGCAAAGGATCTGTTGGCTTCGGCTCAGGTCTCCATGGTTGGGCGTTCACACTCAAA

CAATTTGCTGAGATGTATTCAGAGAAATTCAAGATCGATGTTACAAAGCTGATGAGTCGTCTCTGGGGA

GAGAACTTCTTTAACCCAACTACAAAGAAGTGG---AGCTCTCAAAAGAACCCAGACAA---CAAGAGG

TCATTCAACATGTACGTTTTAGACCCCATTTTCATGATCTTCCGGACAATAATGGGACACAAGAAAGAG

GAGGTGGAAGCTCTACTGAAAAAGCTCAACATTAAATTGTCAGTAGATGATAGAGAAAAAGAAGGCAAG

GCATTACTGAAGGTGGTCGTTCGTCAGTGGCTCCCCGCTGGTGACGCTCTGCTTCAGATGATAGCCATT

CATCTGCCATCGCCCGTCACAGCACAGAAGTATCGAATGGAAATGCTTTATGAAGGCCCACTTGATGAT

GAAGCTGCTACGGCTGTTAAGAATTGTGACCCTGAAGGCCCATTGATGATGTACGTGTCAAAGATGGTA

CCAACATCTGACAAAGGCCGTTTTTATGCTTTTGGTCGTGTTTTCGCTGGTAGGGTTGCCACCGGCCAG

AAGGTGAGGATTATGGGACCCAATTTCACCCCAGGGAAAAAGGAAGACTTATACGAAAAGACTATTCAA

AGAACAATTTTGATGATGGGTAGATACGTGGAGGCAATTGAGGATGTTCCATGCGGTAACATCTGTGGT

TTGGTTGGTGTTGACCAGTTTTTGGTCAAAACAGGAACAATTACCACGTTCAAGGATGCACATAACATG

AGAGTGATGAAATTTAGCGTATCTCCTGTCGTGCGTGTGGCTGTTGAGCCAAAGAATCCAGGCGATTTA

CCAAAACTTGTGGAAGGACTTAAACGTTTAGCCAAATCAGATCCTATGGTACAGTGTATTATGGAAGAG

TCAGGAGAGCATATTATTGCTGGTGCTGGTGAGCTCCATCTGGAAATTTGTTTAAAAGATTTAGAAGAA

GATCACGCCTGCATTCCAATTAAGAAATCCGACCCAGTTGTGTCCTATAGAGAAACAGTGGCTGAGGAA

AGTAATCAAATGTGCTTGAGTAAGTCTCCAAACAAGCACAATCGTCTATTTATGAGAGCTGTACCAATG

CCCGAGGGATTGCCTGAAGACATCGACAAAGGTGAGGTCAATCCACGTGACGACTTTAAAATCCGAGGT

CGCTACCTTGCGGATAAGTATGAATACGACATTACTGAAGCAAGAAAGATCTGGTGTTTTGGTCCTGAC

ACCACTGGGCCCAATCTCCTTATGGACTGTACTAAAGGTGTCCAATACCTTAATGAAATTAAGGATTCA

GTT

Chilopoda [AF240828] ATCTACTTTGACAGATTCATTAGTGAGTAAAGCTGGGATT

ATTGCTCAGGCAAAAGCTGGTGAAATGCGTTTTACTGATACAAGAAAAGATGAACAAGAAAGATGTATC

ACCATCAAATCAACAGCAATTTCAATGTATTTTGAAGTTAAGGAAAAAGATTTAGTATTTATTAAAGAA

GACACTCAAAAAGAAAAAGAAACAAAAGGATTTTTGATAAATCTCATTGATTCACCTGGACATGTAGAT

TTCTCTTCGGAAGTTACCGCTGCTTTGCGTGTTACTGACGGGGCTTTAGTTGTAGTTGATTGTGTCAGT

GGAGTATGTGTACAAACTGAAACAGTACTTAGACAAGCTATTGCAGAAAGAATTAAACCAGTTCTGTTT

ATGAATAAAATGGATCGTGCTCTATTGGAGCTTCAATTAGATCAAGAAGATTTATATCAGACATTTCAA

AGAATTGTTGAAAATGTAAATGTAATTATTGCCACGTATGGTGATGAAACTGGTCCAATGGGTGATATT

AATGTGGATCCTAGCAAGGGAAGTGTTGGATTTGGATCTGGACTACATGGTTGGGCTTTTACTCTGAAG

CAGTTTTCAGAAATCTATGCAGAAAAATTTAAAATTGATGTTGAAAAACTGATGAAACGATTATGGGGT

GAAAATTTCTATAATCCCAAGTCCAAAAAGTGGGCTAAATCTAATGATGAGACTGGTGAATTTAAGCGT

TCTTTCTGCATGTTTATATTGGATCCTATTTATAAAGTTTTTGATGCCATTATGAATTACAAGACTGAT

GAAATTCCCAAACTTCTAGAGAAACTTAACATTATTCTTAAAGGTGAAGACAAGGATAAAGATGGTAAA

AGCTTATTGAAGGTTGTCATGCGTCAATGGTTACCAGCTGGTGAAGCTTTACTTCAAATGATAGCCATT

CATTTGCCATCTCCTGTTAAAGCTCAAAAGTATAGGATGGAAATGCTTTATGAAGGTCCTCATGATGAT

GAAGCTGCTGTTGCTGTTAAAAACTGTGACCCTAGTGGACCTCTGATGATGTATGTATCAAAAATGGTA

CCGACTTCTGATAAAGGTCGGTTTTATGCTTTTGGCCGAGTCTTCTCTGGAGTTGTAAGCACTGGACAG

AAAGTTAGAATAATGGGCCCAAATTATACACCAGGCAAAAAAGAAGATCTTTATGAAAAAGCTATTCAG

AGGACAATCCTTATGATGGGCCGTTATACAGAGGCTATTGAAGATGTTCCATGTGGAAATATCTGTGGG

CTTGTAGGAGTGGATCAGTTTTTGGTTAAAACCGGAACTATTACAACATTCAAAGATGCACACAACATG

AGGGTAATGAAGTTTTCTGTAAGCCCTGTTGTCCGAGTCGCTGTTGAACCAAAAAATCCTTCAGATCTG

CCTAAACTTGTAGAGGGTTTGAAACGATTAGCTAAATCAGATCCTATGGTGCAGTGCATAATAGAAGAA

TCTGGAGAACATATAATTGCTGGTGCTGGAGAACTTCATTTGGAAATTTGCCTAAAAGACCTTGAAGAA

GATCATGCTTGCATCCCAATTAAAGTATCCGATCCTGTTGTATCTTACCGAGAAACGGTCAGTGAAGAA

TCTGAAATAATGTGCTTGGCTAAGTCGCCAAATAAGCATAATCGTTTGTTTATGAAAGCTCAACCTATG

CCCGAAGGATTGCCAGAAGATATTGACAAGGGAGACGTAACAGCTCGTGATGATTTCAAAGCTCGTGCA

CGCTACTTAAGTGACAAATATGATTATGATGTCACAGAAGCAAGAAAAATTTGGTGCTTTGGGCCTGAT

GGTACTGGGCCTAACATTTTGATTGATTGTACAAAAGGTGTACAATATTTAAATGAGATAAAAGACAGT

GTT

Diplopoda [AF240826] ATCTACCCTGACGGACTCCCTGGTCTCCAAGGCCGGGATC

ATCGCTTCAGCTAAGGCGGGAGAGACCCGATTCACGGACACCCGCAAGGACGAGCAGGAGCGATGCATT

ACCATTAAATCCACTGCAATTTCCATGTACTTCGACTTGAGCGATAAGGATATGTGCTTTATTAAGGAA

GAGAACCAGCGTGACAAGACCCAGAAGGGTTTCTTGATTAACTTGATCGATTCCCCYGGCCACGTAGAT

TTCTCATCTGAGGTGACGGCAGCTCTGCGTGTAACAGATGGGGCTCTCGTGGTTGTGGATTGCGTCAGC

GGTGTGTGTGTCCAAACGGAGACTGTGCTGCGTCAAGCTATCGCCGAACGTATCAAGCCAGTTCTGTTC

ATGAACAAGATGGACCGAGCGCTGTTGGAATTGCAGTTGGAATCTGAAGACCTGTACCAGACTTTTTGC

AGAATTGTAGAGAACATCAACGTTATTATCGCCACATACGGAGACGAAACTGGACCCATGGGCGATGTT

AAGGTTGATCCTTCTAAAGGCTCCGTTGGCTTCGGTTCTGGGCTGCACGGCTGGGCCTTCACGTTGAAA

CAGTTTTCCGAGTTGTACGCCGAAAAATTCGGTATTGACGTGGATAAATTGATGAGACGTTTGTGGGGA

GAGAACTTCTACAACCCTAAATCCAAGAAATGGGCCAAGAGCTCCAACGAGGGACCGGACTTCAAGAGA

TCTTTCTGCATGTTCGTGCTGGATCCCATTTATAAGGTTTTCGACGCCATCATGAATTACAAAACGGAA

GAAATCCCCAAGCTGCTTGAGAAATTAAATATTGTATTGAAAGGAGAGGATAAAGAGAAAGACGGCAAA

CTGCTTTTAAAGACTGTTATGCGCCAGTGGTTGCCAGCCGGTGAAGCTTTACTTCAGATGATAACCATT

CACTTACCTTCTCCCGTTACGGCCCAGAAATACCGTATGGAATTGCTGTACGAAGGACCGCATGATGAC

GAAGCTGCATTAGGTATCAAGAATTGCGACCCCAATGGTCCACTCATGATGTACGTTTCGAAAATGGTA

CCCACTACCGACAAGGGACGTTTCTACGCTTTTGGACGAGTATTCTCCGGCATTGTCAGCACTGGGCAG

AAAGTCCGTATTATGGGGCCTAACTACACTCCAGGCAAAAAGGAGGACCTCTACGAAAAGGCCATTCAA

AGAACTATTTTGATGATGGGTCGCTACACTGAAGCCATTGAAGAAGTGCCATGCGGGAATATTTGCGGA

CTGGTCGGCGTCGACCAGTTCTTGGTCAAGACCGGTACAATCAGTACGTTCAAGGACGCCCATAACTTA

CGTGTGATGAAATTCAGCGTCAGTCCAGTCGTGCGTGTCGCCGTGGAGGCTAAAAACCCATCCGATTTG

CCAAAACTGGTGGAAGGCTTAAAACGTCTCGCCAAGTCCGACCCTATGGTGCAGTGCATCATTGAAGAG

TCTGGAGAGCACATCATTGCCGGCGCTGGTGAATTGCATTTGGAAATCTGCCTCAAAGATTTGGAAGAG

GACCACGCCTGCATTCCTATCAAGGTGTCCGATCCCGTTGTGTCCTACCGGGAGACAGTTACGGAAGAA

TCCGATATTATGTGTTTGGCCAAATCTCCGAATAAGCACAATCGTCTGTACATGAAGGCTGTGCCTATG

CCCGAGGGATTACCAGAAGACATTGACAAGGGTGAGGTAACGGCCAGAGACGACTTCAAATCCCGCGGT

CGACTGCTTGCCGAGAAATACGAGTACGATATCACCGAGGCCCGTAAGATTTGGTGTTTTGGACCCGAT

GGAACCGGCCCTAACATTCTAATTGATTGCACCAAGGGTGTCCAATACTTGAACGAAATCAAGGATTCC

GTA

Hexapoda [NM_080366] GTCCACTCTGACCGATTCCCTTGTGTCGAAGGCTGGTATC

ATTGCCGGAGCCAAGGCTGGTGAGACTCGTTTCACTGACACCCGCAAGGACGAGCAGGAGCGCTGCATT

ACCATCAAGTCGACTGCCATTTCCATGTACTTTGAGGTGGAGGAAAAGGATCTGGTGTTCATTACCCAC

CCCGATCAGCGCGAGAAGGAGTGCAAGGGTTTCCTGATCAACTTGATCGACTCGCCCGGTCACGTTGAC

TTCTCCTCGGAGGTGACCGCCGCCCTTCGTGTAACCGACGGTGCACTCGTTGTTGTAGACTGCGTCTCC

GGAGTTTGTGTCCAGACCGAAACCGTGCTGCGTCAGGCCATCGCTGAGCGTATTAAGCCCATCCTATTC

ATGAACAAAATGGACCGCGCTCTGCTTGAGCTGCAACTAGATGCCGAGGAGCTGTACCAGACCTTCCAG

CGCATCGTCGAGAACGTAAACGTTATCATTGCCACCTATAACGATGACGGAGGACCGATGGGTGAGGTT

CGCGTGGATCCCTCTAAGGGATCAGTGGGCTTCGGTTCTGGGCTTCACGGCTGGGCGTTCACCCTCAAG

CAGTTCTCTGAGATGTACTCCGAGAAATTCAAGATTGATGTTGTCAAGCTAATGAACCGATTGTGGGGT

GAAAACTTCTTTAACGCCAAGACCAAGAAATGG--CAGAAAC----AGAAAGAGGCTGACAACAAACGC

TCGTTCTGCATGTACATCCTGGACCCCATCTACAAGGTGTTCGATGCCATTATGAATTACAAGAAGGAG

GAGATAGGTACCTTGCTCGAGAAAATCGGTGTGACTCTGAAGCATGAAGACAAGGACAAAGATGGCAAA

GCTCTGCTGAAGACTGTGATGCGCACCTGGCTGCCAGCCGGCGAGGCTTTACTTCAGATGATTGCTATT

CATTTGCCGTCGCCAGTGGTTGCCCAGAAGTACCGCATGGAGATGCTGTACGAAGGTCCCCATGACGAT

GAGGCCGCTATCGCCGTTAAGTCTTGCGATCCTGATGGTCCTCTAATGATGTACATTTCTAAGATGGTA

CCGACCTCTGACAAGGGTCGCTTCTATGCTTTCGGTCGTGTGTTCGCCGGTAAGGTGGCCACCGGGCAA

AAGTGCCGAATCATGGGCCCCAACTACACTCCCGGCAAGAAGGAGGACTTATATGAGAAGGCTATTCAG

CGCACAATTCTCATGATGGGTCGTTACGTCGAGGCCATCGAGGATGTGCCCTCTGGCAACATTTGCGGT

CTGGTCGGTGTTGATCAGTTCTTGGTTAAGACCGGTACGATTACCACCTTCAAGGACGCCCACAACATG

AAGGTCATGAAGTTCTCCGTGTCCCCTGTGGTGCGCGTGGCTGTTGAGCCAAAGAACCCCGCGGACTTG

CCTAAGCTGGTGGAGGGCTTGAAGCGTTTGGCTAAGTCCGATCCTATGGTGCAGTGTATCATCGAAGAG

TCCGGCGAGCATATCATTGCTGGTGCCGGTGAGCTGCATTTGGAGATCTGCCTTAAGGATCTAGAGGAA

GACCACGCTTGTATCCCACTGAAGAAGTCTGATCCCGTCGTCTCCTACCGTGAGACTGTGTCGGAGGAG

TCCGACCAGATGTGTCTGTCCAAGTCGCCCAACAAGCACAACCGTCTGCTGATGAAAGCCCTACCTATG

CCAGACGGTCTTCCCGAGGACATTGATAACGGCGAGGTGAGTGCCAAGGATGAGTTCAAGGCTCGTGCC

CGTTATTTGTCTGAGAAGTACGACTACGATGTGACTGAGGCCCGTAAGATCTGGTGCTTCGGCCCCGAC

GGAACCGGTCCGAATTTCATCCTCGACTGTACCAAGTCCGTGCAGTACCTTAACGAAATCAAGGACTCT

GTT

Malacostraca [AF240816] ATCAACTTTAACAGACTCCCTTGTATCTAAAGCTGGTATT

ATTGCCTCTTCAAGAGCAGGTGAAACTAGATTTACAGACACTAGAAAAGATGAACAAGAGAGATGCATT

ACAATTAAATCAACAGCCATCTCTATGTTCTTCCGGCTTGGCCAAGAAAATCTAGACCTTATTACAAGC

CCAGATCAGAAAGAAAGTAATGAAGACGGTTTTCTTATTAATTTAATTGATTCACCCGGTCACGTAGAT

TTTTCATCTGAAGTAACAGCTGCCTTACGAGTAACTGATGGAGCCCTTGTAGTTGTTGATTGTGTTTCA

GGTGTTTGTGTACAGACAGAGACTGTACTTAGGCAAGCTATTGCGGAAAGAATTAAGCCAGTTTTATTC

ATGAATAAGATGGACAGAGCTCTTCTTGAACTTCAGTTGGAACCAGAAGAACTGTATCAGACTTTCCAG

CGTATTGTTGAAAATGTTAATGTTATTATTGCTACATACAATGACGACTCTGGTCCTATGGGTGAAATG

AGAGTAGATCCTAGTAAAGGTTCTGTTGGTTTTGGCTCGGGTCTTCATGGATGGGCTTTCTCAGTTAAG

GAATTTGCCGACATCTACGCATCGTTATTCAAAGTTCCAGCTGCAAAGTTGATGACAAAATTATGGGGT

GAAAACTTCTTCAACAAAAAGACAAAGAAATGG---AGCAAAGGGAAGGAAAACGATAA---TGAGAGA

GCCTTTAATATGTATATCCTTGATCCAATTTTCAAGCTTTTTGATGCCATTATGAACTTCAAGAAAGAA

GAAACTCAAAAACTACTCGATACACTGAAAATTAAATTGTCTTCTGARGACAGAGATAAAGAAGGAAAA

GCTCTCTTAAAGGTGGTTATGAGAACTTGGTTGCCTGCTGGTGACACACTTTTCCACATGATAACTATT

CATTTACCATCTCCTGTAACAGCTCAGAAATATAGAGCTGAAATGCTCTACGAAGGTCCTAGTGATGAT

GCTGCCTGCACTGGTATTAAGAACTGTGATTCTAACGCACCATTAATGATGTACATCTCAAAAATGGTA

CCAACATCTGATAAGGGAAGATTCTATGCCTTTGGTCGTGTATTCTCTGGTAAAGTAGCTACTGGACAA

AAAGTAAGAATTATGGGACCGAACTACACCCCTGGCAGAAAGGAAGATCTTTATGAAAAAGCTATTCAG

CGGTCCATTCTTATGATGGGAAGATTTGTAGAAGCTATTGAAGATGTACCAGCAGGAAATATCTGTGGT

TTAGTTGGTGTTGACCAGTATTTAGTTAAAACTGGTACAATTTCGACATTCAAAGAGGCTCACAACTTA

AAGGTTATGAAGTTCAGTGTATCACCTGTTGTGAGAGTTGCTGTAGAACCAAAGAATCCATCAGATTTG

CCGAAACTCGTTGAAGGTTTGAAAAGATTGGCAAAATCAGATCCTATGGTACAGTGCATTATTGAAGAA

TCTGGTGAACATATCGTTGCAGGTGCTGGTGAATTGCATTTAGAAATTTGTTTGAAGGATCTTGAGGAA

GACCATGCTTGTATTCCACTAAAGAAGACCGATCCAGTTGTCTCTTACAGAGAAACTGTCTCTGCTGAA

TCTTCAGAAGTCTGCTTGTCAAAGTCTCCAAATAAGCACAATAGATTGTACATGAAAGCTATGCCTTTG

CCCGATGAACTTTCTAATGATATTGATGATAACAAGGTTACGCCGCGTGACGACCCCAAAGTACGAAAA

GCTTACTTGTGTGAACATCATGAGTTCGATGCCACTGATGCCATGAAGATTTGGACTTTTGGACCTGAA

CAAACTGGGCCTAATCTTTTGATAGATACAACTAAAGGAGTACAGTACCTTAATGAAATTAAAGATTCT

TGC

Xiphosura [AF240821] GTCAACTCTGACAGACTCTCTTGTATCTAAGGCTGGTATT

ATTGCTGCTGCCAAAGCTGGAGAAGCTAGGTTTACWGACACCAGAAAAGATGAACAAGAAAGATGCATT

ACTATAAAATCCACGGCTCTTTCCATGTACTTTGAGTTGGAAGATAAAGATTTGCAATTCATTACATGG

GAAAATCAAAGAGAAAAAGGCGAAAAGGGTTTTTTGATCAATTTGATTGATTCTCCGGGCCATGTAGAC

TTYTCTTCAGAAGTTACAGCTGCCTTACGTGTAACTGATGGAGCCCTGGTTGTTGTGGACTGTGTTAGT

GGAGTGTGTGTTCAGACAGAAACTGTGCTACGCCAAGCAATTGCAGAACGAATAAAACCTGTTCTATTC

ATGAATAAGGTGGACTTGGCTCTATTGACTCTACAGCTTGAAGCTGAGGAGCTCTATCAAACATTCCAG

AGAAATATTGAAAACATCAATGTCATCATTGCCACATACAGTGATGAGACAGGACCAATGGGTGATATA

AAGGTGGATCCAATGAAAGGAAGTGTTGGATTTGGTTCTGGTCTCCATGGATGGGCATTCACTCTCAAA

CAGTTTTCTGAAATTTATGCTGAGAAGTTTAAAATCGACATTGATAAGCTAATGGGTAAATTGTGGGGT

GAGAACTATTATAATCCACAGACAAAAAAATGGAGCAAGAAG------GCTGGTGAAGGGTACAAGAGA

GCTTTCATAATGTTTGTGTTGGACCCTATTTACAAGGTGTTTGATGCTATCATGAATTACAAGAAAGAA

GAAACATCCAAGCTCTTAGAGAAGCTGAATATAGTTTTGAAAGGAGAAGATAAGGAAAAAGATGGAAAG

AATCTTCTAAAGGTGGTGATGCGAACTTGGCTTCCTGCTGGTGACTCTCTTCTCCAGATGATCACCATT

CACTTGCCTTCACCAGTGACTGCCCAGAAGTACCGTATGGAAATGCTTTATGAAGGGCCATTAGATGAT

GAGGCTGCTGTAGCCATCAAGGCATGTGATCCAAATGGACATTTGATGATGTACATATCAAAGATGGTT

CCTACCACTGATAAAGGTCGTTTCTATGCATTTGGCCGAGTATTTTCTGGAACTGTATCATCAGGTTTG

AAGTGTCGTATCATGGGTCCTAATTATGTGCCAGGCAAGAAAGAAGACATTGTCGAAAAGTCTGTTCAA

AGAACTATACTTATGATGGGTCGGTACGTAGAACCAATTGAAGACGTTCCATGTGGAAACATCTGTGGA

CTGGTTGGTGTAGATCAGTTTTTAGTAAAAACTGGTACCATTTCCACATTCAAAGATGCACATAACATG

AAGGTGATGAAATTCTCTGTAAGTCCTGTAGTGAGAGTTGCTGTTGAACCTCAAAATCCTGCTGACCTG

CCCAAACTTGTAGAAGGTCTGAAACGTCTAGCAAAATCTGATCCTATGGTTCAGTGTATTATTGAAGAA

TCAGGAGAACACATTATTGCTGGAGCTGGTGAATTGCACTTGGAAATCTGTCTGAAAGACTTGGAAGAA

GATCATGCTGGAATTCCACTAAAGAAAACTGATCCAGTTGTATCGTATCGTGAAACTGTTTCTGAAGAA

TCTAAAATTACGTGTCTCTCAAAGTCTCCAAATAAGCACAACAGGCTGTTCATGAAGGCCAATCAACTT

TCTGATGGCTTACCAGAGGACATTGATAATGGTAAAGTGACCCATAAAGATGACTTTAAGGCACGTGCT

CGTTATCTGACTGAAAAATATAGCTGGGATGCCACAGAAGCACGAAAGATTTGGGCTTTTGGACCTGAG

GGCAGTGGACCAAACCTTCTGGTGGATTGTACCAAGGGTGTTCAGTATTTAAATGAAATCAAGGATTCT

GTA

[sU2 rRNA char=133]

Annelida [AF185204] GATCAAAGTGTAGTATCTGTTCTTATCAGCTTAATATCTG

ATACGTCCCCCATTGGGGGACAACGATATTAAACTGATTTTTGGAACTGGGGGAAGATGCA-GGAGCTT

GCTCCGACTTCCCCACGGGTTGGC

Arachnida [AF110906] GATCAAAGTGTAGTATCTGTTCTTATCAGCTAAATATCTG

ATACGGTCCCTAT-ATGGGCCCAGAATATTAAACTGATTTTTGGAAACCGGGGGGATGTCT-GGGGCTT

GCTCCGCTCCCTCCACGCGTTGGC

Branchiopoda [AF110898] GATCAAAGTGTAGTATCTGTTCTTATCAGCTTAATATCTG

ATACGATTCCCATNGTGGATCCAGAATATTAAACTGATTTTTGGAAACTGGCGGAGTGCT--GGGGCTT

GCTCCACCTCCGCCGCGGGTTGGC

Chilopoda [AF110882] GATCAAAGTGTAGTATCTGTTCTTATCAGCTTAATATCTG

ATACGGTCCCCATTGGGGGCCCAGAATATTAAACTGATTTTTGGAATCAGGCGGGGTGTTTAGGGGCTT

GCTCCACCCCCGCCACTGGTTGGC

Diplopoda [AF110889] GATCAAAGTGTAGTATCTGTTCTTATCAGCTTAATCTCTG

ATACGCCCCCCATTGGGGGGCCAGATGATTAAACTGGTTTTTGGAACAGGGCGGAGTGCTA-GGGGCTT

GCTCCACCTCTGCCACGGGTTGGC

Hexapoda [AF370823] GATCAAAGTGTAGTATCTGTTCTTATCAGCTTAATATCTG

ATACGTCCTGCATCGCAGGACCAGAATATTAAACTCATTTTTGGATCATGACGGAGTGCTA-AGTGCTT

GCACTACCTCTGTCACGGGTTGGC

Malacostraca [AF110897] GATCAAAGTGTAGTATCTGTTCTTATCAGCTTAATATCTG

ATACGATCCCCATGCGGGATCAACGATATTAAACTGATTTTTGGCCTTTGGCGAAGTGCTA-GGAGCTT

GCTCCACCTTTGCCGCGGATCAGC

Xiphosura [AF110902] GATCAAAGTGTAGTATCTGTTCTTATCAGCTTAATATCTG

ATACGGTTCCCAT-TGGGGACCATGATATTAAACTTATTTTTGTGAGGCGGCGGGGTGCTT-GGAGCTT

GCTCCACTCCTGCCACGGGTTGGC

[18s nchar= 1893]

Annelida [Z83751] ATTAAGCCATGCATGTCTAAGTACATACCTTTACACGGTG

AAGCTGCGAATGGCTCATTAAGGCCACCCATGAATTTATTAAGATCGTACTATTCTACTTGGATAACTG

TGGTAATTCTAGAGCTAATACATGC-AACCAAGCTCTGACCCGC-GAGGGAGGAGCGCGTTTATTAGAT

CAAAACCAATCGGTTCTCGTCTCTTCCGCGGGGACGGAGGCCGTAACGATGGTGACTCTGTGGATAACT

TCGGGCGGATCGCATGACCCTCGAGTCGGCGACAGATGTTTCAAGTGTGTGCCCTATCAACTTTCGAAG

GTACGCCGACTTTGCCTACCATGGTAGTTAACGGGTAACGGGGAATCAGGGTTCGATTCCGGAGAGGGA

GCCTGAGAAACGGCTACCACATCCAAGGAAGGCAGCAGGCGCGCAAATTACCCAATCCCGACTCGGGGA

GGTAGTGACGAAAAATAACAATACAGGGCTTTGACAAG-TCTCGTAATTGGAATGAGTAGACTTTAAAT

CCTTTAACGAGGATCAATTGGGAGGGCAAGTCTGGTGCCAGCAGCCGCGGTAATTCCAGCTCCAATAGC

GTATGTTATAGTTGTTGCAGTTAAAAAGCTCGTAGTTGGATCTCGGGTTCGGACTGGTTGCAACCTC--

--GCGG---CGTAGCGACCCGCTCC---GACCTGTTTTCGGTTCTGCG---------------------

-------------------------------------------------------CCCGGTTCTTCTTA

ACCGAGTGCCGGGTGCGGCCGAGACGTTTACTTTGAAAAAATTAAAGTGCTTAAAGCAGGCTCGAC-AG

CCTGAATAGTA-GCGCATGGAATAATAGAATAGGACCTCGGTTCTATTTTGTTGGTTTTCGGAGCTC-G

AGGTAATGATTAAGAGGGACAGTTGGGGGTCATTGCGGTTATTTCGATTGTCAGAGGTGAAATTCTTGG

ATTTGCGAAAGACGAACTAATGCGAAAGCATTTGCCAAGAATGTTTTCATTAATCAAGAACGAAAGTTA

GAGGCTCGAAGACGATCAGATACCGTCGTAGTTCTAACCGTAAACGATGCCGACTAGGGATCGGAGGGT

GTTATTTCATGAACCCCTTCGGCACCTTGGGGGAAACCAAAGTTTTTGGGTTCCGGGG-AAGTATGGTT

GCAAATCTGAAACTTAAAGGAATTGACGGAAGGGCACCACCAGGAGTGGAGCCTGCGGCTTAATTTGAC

TCAACACGGGAAA-CTCACCAGGTCCGGACATGGTAAGAATTGACAGATCGAGAGCTCTTTCTTGATTC

TATGGGTGGTGGTGCATGGCCGTTTCTTAGTTGGTGGAGCGATTTGTCTGGTTAATTCCGATAACGAAC

GAGACTCTTCATCCTGCTAAATAGTACAGCCGCTGTCAGCCGCAACGTCTTCGGGCGTTCGGACGTCTG

GAAACAGCGCTGCCGGTGCAGAC--TTCTTAGAGGGATGCGTGGCGTTTAGTCACACGAGATTGAGCAA

TAACAGG-CTGTGATGCCCTTAGATGTTCGGGGGCCGCACGCGCGCTACACTGATGGTATCAGCGTGTT

TTTCGTGCCTGCTCGTTAGGCGCGGGTAATCTTGTTGAAACTCCTTCGTGCTGGGGATAGGGGTTTGCA

ATTATTCCCCATGAACGAGGAATTCCCAGTAAGCGCGAGTCATAAGCTCGCGTTGATTACGTCCCTGCC

CTTTGTACACACCGCCCGTCGCTACTACCGATTGGATGGTTTAGTGAGGTCATCGGATTCGAAGGCTCG

GCGGGGCTT-CACCTT---GCGCGATTCTTTGAAGAAGACGATCGAACTTGATCATCTA

Arachnida [AF370784] ATTAAGCCATGCATGTCTAAGTACATGCCTCATTAAGGCG

AAACCGCGAATGGCTCATTAAA-TCAGTTATGG--TTCCTTAGATCGTACCTTACTACTTGGATAACTG

TGGTAATTCTAGAGCTAATACATGC-ATCAGAGCTCCGACCCTC-TGGGGACGAGCGCTTTTATTAGAC

CAAAACCAATCGGAC------TTTG-TCCGT------------ATCCTATGGTGACTCTG--TATAACT

TTGGGCTGATCGCATGGGCTT-GTCCCGGCGACGCATCTTTCAAGTGTCTGCCTTATCAACTGTCGATG

GTAGGTTA--TGCGCCTACCATGGTCGT-AACGGGTAACGGGGAATCAGGGTTCGATTCCGGAGAGGGA

GCCTGAGAAACGGCTACCACATCCAAGGAAGGCAGCAGGCGCGCAAATTACCCACTCCCGGCACGGGGA

GGTAGTGACGAAAAATAACAATACGGGACTCTTTTGAGACCCCGTAATTGGAATGAGTACACTCTAAAT

CCTTTAACGAGGATCTATTGG-AGGGCAAGTCTGGTGCCAGCAGCCGCGGTAATTCCAGCTCCAATAGC

GTATATTAAAGTTGTTGCGGTTAAAAAGCTCGTAGTTGGATCTCAGTTCCAGACGGGCGGTCCGCCTAA

CGGTGG----TTACTGCC-TGGCCT---GAACAGCCAGCCGGTTT-C----------------------

-------------------------------------------------------CCTAGATGATCTTC

ACCGGTTGTCTTGGGTGACCGGCACGTTTACTTTGAAAAAATTAGAGTGCTCAAAGCAGGCGTGT--AG

CCTGAATAATG-GTGCATGGAATAATGGAATAGGACTTCGTTTCTATTTTGTTGGTTTTCGGAACAC-G

AGGTAATGATTAAGAGGGACAGACGGGGGCATTCG----TATTGCGAC-GCTAGAGGTGAAATTCTTGG

ACCGTCGCAAGACGAACTACTGCGAAAGCATTTGCCAAGAATGTTTTCATTAATCAAGAACGAAAGTTA

GAGGTTCGAAGGCGATCAGATACCGCCCTAGTTCTAACCATAAACGATGCCAACCAGCGATCCGCCTGA

GTTCCTCAAATGACTCGGCGGGCAGCTTCCGGGAAACCAAAGTGTTTGGGTTCCGGGGGAAGTATGGTT

GCAAAGCTGAAACTTAAAGGAATTGACGGAAGGGCACCACCAGGAGTGGAGCCTGCGGCTTAATTTGAC

TCAACACGGGAAAACTTACCCGGCCCGGACACTGGAAGGATTGACAGATTAAGAGCTCTTTCTTGATTC

AGTGGGTGGTGGTGCATGGCCGTT-CTTAGTTGGTGGAGCGATTTGTCTGGTTAATTCCGATAACGAAC

GAGACTCT--AGCCTACTAAATAGGCG-------------T-CCCGATC--------------------

-A----CTTCAGTCGG-GCGTTC--TTCTTAGAGGGACAAGTGGCGTTTAGCCGCACGAGACAGAGCAA

TAACAGGTCTGTGATGCCCTTAGATGTCCGGGG-CCGCACGCGCGCTACACTGAAGGAATCAGCGTGTG

-CTT-TCCCTGTCCGGTAGGACTGGGTAACCC-GTTCAACCTCCTTCGTGATAGGGATAGGGGCTTGTA

ATTGTTCCCCTTGAACGAGGAATTCCCAGTAAGCACGAGTCATAAGCTCGTGTTGATTACGTCCCTGCC

CTTTGTACACACCGCCCGTCGCTACTACCGATTGAATGATTTAGTGAGGTCTTCGGACTGGCGCTCGGA

GCGGCCGCAAGGTCGC---GCCGGCGT--GCCGGAAAGATGACCAAACTTGATCATTTA

Branchiopoda [AF144219] ATTAAGCCATGCATGTCTAAGTACAAGCCGCTCTGCGGCG

AAACCGCGAATGGCTCAATAAA-TCAGTTATGG--TTCCTTAGATCGTACCATCCTACTTGGATAACTG

TGGTAATTCTAGAGCTAATACATGCACACA-AGCCCTGACCTCA--CGGAAAGGGTGCTTTTATTAGAT

CAAAACCAATCGGGC------TTCGGCCCGT------------TGT-TTTGGTGACTCTG--GATAACT

CTTAGCAGATCGCATGGTCTC-GCACCGGCGACGCATCTTTCAAATGTCTGCCTTATCAACTGTCGATG

GTAGGTTA--TGCGCCTACAATGGTTGC-AACGGGTAACGGGGAATCAGGGTTCGATTCCGGAGAGGGA

GCCTGAGAAACGGCTACCACATCCAAGGAAGGCAGCAGGCGCGCAAATTACCCACTCCCGGCACGGGGA

GGTAGTGACGAAAAATAACGATACGGGACTCTTCCGAGGCCCCGTGATTGGAATGAGTACACTTTAAAT

CCTTTAACGAGGACCCATTGG-AGGGCAAGTCTGGTGCCAGCAGCCGCGGTAACTCCAGCTCCAATAGC

GTATATTAAAGTTGTTGCGGTTAAAAAGCTCGTAGTTGGATTCCGGTCCTGGGCGGGCGGTACCGCCAT

CGTGCG---TGCACTGCCTAGGCGG---GACAAATCACCGCGACTAT----------------------

-------------------------------------------------------CCGGGGTGCTCTTA

ACTGAGTGTCCTGGGTGGCCGGTACGTTCACTTTGAACAAATTAGAGTGCTCAAAGCAGGTGCTCCGCG

CCTGAATATCACA-GCATGGAATGATGGAATAGGACCTCGGTCTTATTTTGTTGGTTTTCTGGACCC-G

AGGTAATGGTTAATAGAGACAGACGGGGGCATTCG----TACTGCGAC-GCTAGAGGTGAAATTCTTGG

ACCGTCGCAAGACGAACAACTGCGAAAGCATTTGCCAAGAATGTTTTCATTAATCAAGAACGAAAGTTA

GAGGTTCGAAGGCGATCAGATACCGCCCTAGTTCTAACCATAAACGATGCCAACTAGCGATCCGCCGGA

GTTACTCCCATGACTCGGCGGGCAGCTTCCGGGAAACCAAAGTTTTTGGGTTCCGGGGGAAGTATGGTT

GCAAAGCTGAAACTTAAAGGAATTGACGGAAGGGCACCACCAGGAGTGGAGCCTGCGGCTTAATTTGAC

TCAACACGGGAAACCTCACCAGGCCCGGACACTGGAAGGATTGACAGATTGAGAGCTCTTTCTTGATTC

GGTGGGTGGTGGTGCATGGCCGTT-CTTAGTTGGTGGAGCGATTTGTCTGGTTAATTCCGATAACGAAC

GAGACTCT--AGCCTGCTAAATAGGCG---------------ACGGGTTT-------------------

------TATCCGTCCG-TCGCTC--TTCTTAGAGGGACAAGCGGCGTCCAGCCGCATGACAAAGAGCAA

TAACAGGTCTGTGATGCCCTTAGATGTCCTGGG-CCGCACGCGCGCTACACTGAAGGAATCAGCGTGT-

---TTTCCCTGTCCGAGAGGACCGGGTAA-CC-GCTGAACCTCCTTCGTGGTTGGGATTGGGGACTGCA

AT-GATCCCCATGAACCAGGAATCCCTAGTAGGCGCAAGTCACTAGCTTGCGTCGATTACGTCCCTGCC

CTTTGTACACACCGCCCGTCGCTACTACCGATTGAATGATTTAGTGAGGCCTTCGGACGGACTCGCCGG

GCGGAGCTTCCGCTTC---GCTCCGGCGGGACTGAAAGATGGTCGAACTTGATCCTTTA

Chilopoda [AF334271] ATTAAGCCATGCATGTCCAAGTGCTTGCCGCATTAAGGTG

AAACCGCGAATGGCTCATTAAA-TCAGTTATGG--TTCCTTAGATCGTACYATCCTACTTGGATAACTG

TGGTAATTCTAGAGCTAATACATGCCGACC-AGCTCCGACCTT--CGGGGACGAGCGCTTTTATTAGAA

CAAGACCAATACGGATCCGCAAGGGTCCGGT------------CCCGTTTGGTGACTCTG--GATAACT

TGGAGCCGATCGCACGGTCTTCGCACCGGCGACGCATCTTTCAAATGTCTGCCTTATCAACTGTCGATG

GTAGGTTA--TGTGCCTACCATGGTTTT-TACGGGTAACGGGGAATCAGGGTTCGATTCCGGAGAGGGA

GCCTGAGAAACGGCTACCACATCCAAGGAAGGCAGCAGGCACGCAAATTACCCACTCCCGGCACGGGGA

GGTAGTGACGAAAAATAACAATACGAGACTCTTMCGAGGCCTCGTAATTGGAATGAGTACACTTTAAAT

CCTTTAACGAGGATCTATTGG-AGGGCAAGTCTGGTGCCAGCAGCCGCGGTAATTCCAGCTCCAATAGC

GTATATTAAAGTTGTTGCGGTTAAAAAGCTCGTAGTTGGATCTCGGTGCCGGACCGGCGGTCCGCC--T

CGTGCG-GTCTCACTGCC--GGCCCCGGAGCCATCCCGCCGGCCGTC----------------------

-------------------------------------------------------CCTCGGTGCTCTTC

GCTGAGTGTCTTGGGTGACCGGAACGTTTACTTTGAACAAATTAGAGTGCTCCAAGCAGGCGCGTCCCG

CCCGCATAGCCCA-GCATGGAATAATGGAATAGGACCTCGGTTCTATTTTGTTGGTTTTCGGAACCC-G

AGGTAATGATTAATAGGGACAGACGGGGGCATTCG----TATTGCGAC-GCTAGAGGTGAAATTCTTGG

ACCGTCGCAAGACGAACTACTGCGAAAGCATTTGCCAAGAATGTTTTCATTAATCAAGAACGAAAGTTA

GAGGTTCGAAGGCGATCAGATACCGCCCTAGTTCTAACCATAAACGATGCCGACCAGCGATCTGCCGAA

GTTCCTCCGATGACTCGGCGGGCAGCTTCCGGGAAACCAAAGTGTTTGGGTTCCGGGGGAAGTATGGTT

GCAAAGCTGAAACTTAAAGGAATTGACGGAAGGGCACCACCAGGAGTGGAGCCTGCGGCTTAATTTGAC

TCAACACGGGAAAACTCACCCGGCCCGGACACCGGAAGGATTGACAGATTGAGAGCTCTTTCTTGATTC

GGTGGGTGGTGGTGCATGGCCGTT-CTTAGTTGGTGGAGCGATTTGTCTGGTTAATTCCGATAACGAAC

GAGACTCT--AGCCTGCTAAATAGACGACCGATCCCAGGGTGCCAGTTCCCTCCTYGTGGGGGAAC--G

GTTTTGCCTCTGTCGG-TTGATCGCTTCTTAGAGGGACAAGCGGCGCTCAGCCGCACGAGATTGAGCAA

TAACAGGTCTGTGATGCCCTTAGATGTCCGGGG-CCGCACGCGCGCTACACTGAAGGAATCAGCGTGTG

TCCTCCCCCAGTCCGRCAGGACCGGGTAACCC-GCTGAACCTCTTTCGTGATAGGAATCGGGGTTTGGA

ATTGTCCCCCGTGAACGAGGAATTCCCAGTAAGCGCGAGTCATAAGCTCGCGTTGATTACGTCCCTGCC

CTTTGTACACACCGCCCGTCGCTACTACCGATTGAATGATTTAGTGAGGTCTTTGGACTGGCGGTCGCG

GCGGCYCTCGGGTCGCT--GC-GGCRT--GCCGGGAAGATGACCGAACTTGACCATTTA

Diplopoda [AF005449] ATTAAGCCATGCATGTCTAAGTACATGCCCTAGAAAGGTG

AAACCGCGAATGGCTCATTAAA-TCAGTCATGG--TTCCTTAGACCGTACTCTCCTTCTTGGATAACTG

TGGTAATTCTAGAGCTAATACATGC-AACTGAGCTCCGACCCTN-GTGGAACGAGCGCTTTTATTAGAC

CAAGATCAATCGGTGCTTCGGTGCTGACAGT------------CTG---TGGTGACTCTG--GATAACT

TTCAGCGGATCGCATGGTCTTTGTGCCGGCGACTGCTCTTTCAAATGTCTGCCTTATCAACTGTCGATG

GTAGGTTA--CTTGCCTACCATGGTTGT-AACGGGTGACGGGGAATCAGGGTTCGATTCCGGAGAGGGA

GCCTGAGAAACGGCTACCACATCCAAGGAAGGCAGCAGGCACGCAAATTACCCACTCCCAGCACGGGGA

GGTAGTGACGAAAAATAACAATGCGGGACTCTTACGAGGCCCCGTAATTGGAATGAGTCCACTTTAAAT

CCTTTAACGAGGACCTATTGG-AGGGCAAGTCTGGTGCCAGCAGCCGCGGTAATTCCAGCTCCAATAGC

GTATACTAAAGTTGTTGCGGTTAAAAAGCTCGTAGTTGGATGTCAGTTGCGGGCGGGCGGTCCACCG--

TTTTGGTGGTTTACTGCT--CGTCCCGTGACCTACCAACCGGCCTCCC---------------------

-------------------------------------------------------CCGCTATGCTCTTT

ACCGAGTGTGGCGGGTGGCCGGAACTTTTACTTTGAAAAAATTAGAGTGCTCTAAGCAGGTGCATGCCG

CCTGAATAACACA-GCATGGAATAATGGAATAGGACCTCGGTTCTATTTTGTTGGTTTTCGGAATTCTG

AGGTAATGATTAATAGGGACGGACGGGGGCATTCG----TATTGCGGC-GCTAGAGGTGAAATTCTTGG

ACCGTCGCAAGACGAACTAGTGCGAANGCATTTGCCAAGAATGTTTTCATTAATCAAGAACGAAAGTTA

GAGGTTCGAAGGCGATCAGATACCGCCCTAGTTCTAACCATAAACGATGCCAACCAGCGATCCGCCGGA

GTTCCTCCAATGACCCGGCGGGCAGCTTCCGGGAAACCAAAGTGTTTGGGTTCCGGGGGAAGTATGGTT

NNAAAGCTGAAACTTAAAGGAATTGACGGAAGGGCACCACCAGGAGTGGAGCCTGCGGCTTAATTTGAC

TCAACACGGGAAAACTCACCCGGCCCGGACACTGGAAGGATTGACAGATTGAGAGCTCTTTCTTGATTC

AGTGGGTGGTGGTGCATGGCCGTT-CTTAGTTGGTGGAACGATTTGTCTGGTTAATTCCGATAACGAAC

GAGACTCT--AGCCTGCTAAATAGACG--------------GTCGATTCTC------------------

------TGAATGTCGGACCGATC--TTCTTAGAGGGACAAGCGGCGCTCAGCCGCACGAAATTGAGCAA

TAACAGGTCTGTGATGCCCTTAGATGTCCGGGG-CCGCACGCGCGCTACACTGAAGGGATCAACGTGTG

-ATTGCCCCCGCCCGGAAGGGCAGGGTAATCC-GCTGAACCTCCTTCGTGATAGGGACTGGGGCTTGGA

ATTGTTGCCCACAAACGAGGAATTCCCAGTAAGTGCTAGTCATAAGCTAGCGTTGATTACGTCCCTGCC

CTTTGTACACACCGCCCGTCGCTACTACCGATTGAATGATTTAGTGAGGTCTTCGGACTGGAGCCCGGT

GAGACTTCCGTGTTGTCACGCCGGATTGCTTTGGGAAGATGACCGAACTTGACCATTTA

Hexapoda [AF423804 ] ATTAAGCCATGCATGTCTCAGTGCAAGCCAAATTAAGGTG

AAACCGCGAATGGCTCATTAAA-TCAGTTATGG--TTCCTTAGATCGTACCAAGTTACTTGGATAACTG

TGGTAATTCTAGAGCTAATACATGCAAACAGAGTCCCGACCTTAACCGGAAGGGACGCTTTTATTAGAT

CAAAACCAATCGGTCGGCTCGTCCGGTCCGT------------TTGCCTTGGTGACTCTG--AATAACT

TTGGGCTGATCGCACGGTCTTGGTACCGGCGACGCATCTTTCAAATGTCTGCCTTATCAACTGTCGATG

GTAGGTTC--TGCGCCTACCATGGTTGT-AACGGGTAACGGGGAATCAGGGTTCGATTCCGGAGAGGGA

GCCTGAGAAACGGCTACCACATCCAAGGAAGGCAGCAGGCGCGCAAATTACCCACTCCCGGCACGGGGA

GGTAGTGACGAAAAATAACGATACGGGACTCATCCGAGGCCCCGTAATCGGAATGAGTACACTTTAAAT

CCTTTAACGAGTATCCATTGG-AGGGCAAGTCTGGTGCCAGCAGCCGCGGTAATTCCAGCTCCAATAGC

GTATATTAAAGTTGTTGCGGTTAAAAAGCTCGTAGTTGGATTTGTGTCCCACGCTGTCGGTTCATCGCT

CGTCGGTGTCTAACTGGCATGGCTCGTGGGACGTCCTGCCGGTGGTGGCGAGTCGAAAGCGTGCCCCCG

CGGTGTATCCCACCGTGGTTCTCGCGCGCCGTAGGCGGACCCCGATGAAATCCTACCGCGGTGCTCTTC

ACCGAGTGTCGAGGTGGGCCGGCACGTTTACTTTGAACAAATTAGAGTGCTTAAAGCAGGCCTGTTGCG

CCTGAATACTGTGTGCATGGAATAATGGAATAGGACCTCGGTTCTATTTTGTTGGTTTTCGGAACCC-G

AGGTAATGATTAATAGGGACAGGCGGGGGCATTCG----TATTGCGAC-GTTAGAGGTGAAATTCTTGG

ATCGTCGCAAGACGGACCGAAGCGAAAGCATTTGCCAAGTATGTTTTCATTAATCAAGAACGAAAGTTA

GAGGTTCGAAGGCGATCAGATACCGCCCTAGTTCTAACCATAAACGATGCCAGCTAGCGATCCGCCGAA

GTTCCTCCGATGACTCGGCGGGCAGCTCCCGGGAAACCAAAGCTTTTGGGTTCCGGGGGAAGTATGGTT

GCAAAGCTGAAACTTAAAGGAATTGACGGAAGGGCACCACCAGGAGTGGAGCCTGCGGCTTAATTTGAC

TCAACACGGGAAACCTCACCAGGCCCGGACACCGGAAGGATTGACAGATTGAGAGCTCTTTCTTGATTC

GGTGGGTGGTGGTGCATGGCCGTT-CTTAGTTGGTGGAGCGATTTGTCTGGTTAATTCCGATAACGAAC

GAGACTCT--AGCCTGCTAAATAGTCG-------------CATCCGGTATCCCTTCGTG----------

---CTACCGGCGACAA-CACATC--TTCTTAGAGGGACAGGCGGCTTCTAGCCGCACGAGATTGAGCAA

TAACAGGTCTGTGATGCCCTTAGATGTTCTGGG-CCGCACGCGCGCTACACTGAAGGAATCAGCGTGT-

---CCTCCTAGTCCGAAAGGACCGGGCAACCC-GTTGAACCTCCTTCGTGCTAGGGATTGGGGCTTGCA

ATTGTTCCCCATGAACGAGGAATTCCCAGTAAGCGCGAGTCATAAGCTCGCGTTGATTACGTCCCTGCC

CTTTGTACACACCGCCCGTCGCTACTACCGATTGAATGATTTAGTGAGGTCTTCGGACCGGTGCGCGGC

CCTTGCTTCGTGCAGTT--GCTGATGTT-ACTGGAAAGATGACCAAACTTGATTATTTA

Malacostraca [AF235971] ATTAAGCCATGCATGTCTAAGTACAAGC-GCTATGCGGCG

AAACCGCGAATGGCTCATTAAA-TCAGTTATGG--TTCCTTAGATCGTACCATCCTACTTGGATAACTG

TGGTAATTCTAGAGCTAATACATGCAAAAC-AGCCCCGACCTCA--CGGGAGGGGTGCTTTTATTAGAT

CAAAACCAATCGGGC------TTCGGCCCGT------------CCA-CTTGGTGACTCTG--AATAACT

TTGAGCTGATCGCACGGTCTC-GAACCGGCGACGCATCTTTCAAATGTCTGCCTTATCAACTGTCGATG

GTAGGTTA--TGCGCCTACCATGGTTGC-AACGGGTAACGGGGAATCAGGGTTCGATTCCGGAGAGGGA

GCCTGAGAAACGGCTACCACATCCAAGGAAGGCAGCAGGCGCGCAAATTACCCACTCCCGGCACGGGGA

GGTAGTGACGAAAAATAACGATACGGGACTCTTCCGAGGCCCCGTGATTGGAATGAGTACACTTTAAAT

CCTTTAACGAGGACCTATTGG-AGGGCAAGTCTGGTGCCAGCAGCCGCGGTAACTCCAGCTCCAATAGC

GTATATTAAAGTTGTTGCGGTTAAAAAGCTCGTAGTTGGATTCCGGTCGCGGCCGGGTGGTGCCGCCTC

ATGGTG---CGCACTGCCTAGGCCG---GACAA-TCAGCCGGACTAT----------------------

-------------------------------------------------------CCGGGGTGCTCTTA

ACCGGGTGTCCTGGGTGGCCGGTACGTTTACTTTGAACAAATTAGAGTGCTCAAAGCAGGTGCACTGCG

CCTGAATATCACA-GCATGGAATGATGGAATAGGACCTCGGTCTTATTTTGTTGGTTTTCTGGACCC-G

AGGTAATGGTTAATAGAGACAGACGGGGGCATTCG----TACTCCGAC-GCTAGAGGTGAAATTCTTGG

ACCGTCGCAAGACGAACAACTGCGAAAGCATTTGCCAAGAATGTTTTCATTAATCAAGAACGAAAGTTA

GAGGTTCGAAGGCGATCAGATACCGCCCTAGTTCTAACCATAAACGATGCCAACCAGCGATCCGCCGAA

GTTACTCCCATGACTCGGCGGGCAGCTTCCGGGAAACCAAAGTTTTTGGGTTCCGGGGGAAGTATGGTT

GCAAAGCTGAAACTTAAAGGAATTGACGGAAGGGCACCACCAGGAGTGGAGCCTGCGGCTTAATTTGAC

TCAACACGGGAAACCTCACCAGGCCCGGACACTGGAAGGATTGACAGATTGAGAGCTCTTTCTTGATTC

GGTGGGTGGTGGTGCATGGCCGTT-CTTAGTTGGTGGAGCGATTTGTCTGGTTAATTCCGATAACGAAC

GAGACTCT--AGCCTGCTAAATAGGTG---------------GCGGGTCC-------------------

------TACCCGTCCG-TCACTC--TTCTTAGAGGGACAAGCGGCGTCCAGCCGCATGACAGTGAGCAA

TAACAGGTCTGTGATGCCCTTAGATGTCCTGGG-CCGCACGCGCGCTACACTGAAGGAATCAGCGTGT-

---CCTCCCTGTCCGAGAGGACCGGGTAA-CC-GCTGAACCTCCTTCGTGGTTGGGATTGGGGACTGAA

AT-GATCCCCATGAACCAGGAATCCCTAGTAGGCGCAAGTCACTAGCTTGCGTCGATTACGTCCCTGCC

CTTTGTACACACCGCCCGTCGCTACTACCGATTGAATGATTTAGTGAGGACTTCGGACGGACTTGTCGG

GTGGAGCTTCGGCTCT---GCTTCGGCGAGACTGAAAGATGTTCGAACTTGATCCTTTA

Xiphosura [U91491] ATTAAGCCATGCATGTCTAAGTACATGCCGAAATAAGGTG

AAACCGCGAATGGCTCATTAT--CCAGCCGTTG--TTCCTTAGATCGTACTTTCCTACTTGGATAACTG

TGGTAATTCTAGAGCTAATACATGC-AACAAAGCTCCGACC-TC-ACGGGACGAGCGCATTTATTAGAC

CAAGACCAATCGGAC------TTCGGTCCGC------------AAATGATGGTGACTCTG--GATAACT

TTTGGCTGATCGCACGGTCTA-GCACCGGCGACGCATCTTTCAAGTGTCTGCCTTATCAACTGTCGATG

GTAGGTTA--TGCGCCTACCATGGTCGT-AACGGGTAACGGGGAATCAGGGTTCGATTCCGGAGAGGGA

GCCTGAGAAACGGCTACCACATCCAAGGAAGGCAGCAGGCGCGCAAATTACCCACTCCCAGAACGGGGA

GGTAGTGACGAAAAATAACGATACGGGACTCTATCGAGGCCCCGTAATTGGAATGAGTACACTCTAAAT

CCTTTAACGAGGATCTATTGG-AGGGCAAGTCTGGTGCCAGCAGCCGCGGTAATTCCAGCTCCAATAGC

GTATATTAAAGTTGTTGCGGTTAAAAAGCTCGTAGTTGGATCTCAGTTCTAGACAGGGGGTCCGCTT--

TGGCGG----TTACTTCC-TGGCCT---AAACATCCTGCCGGTTTTC----------------------

-------------------------------------------------------CCTCGGTGCCCTTG

ATTGAGTGTCCTGGGTGGCCGGCAAGTTTACTTTGAAAAAATTAGAGTGCTTAAAGCAGGCGAAA--CG

CCTGAATAATG-GTGCATGGAATAATGGAATAGGACCTCGGTTCTATTTTGTTGGTTTTCGGAACAC-G

AGGTAATGATTAAGAGGGACAGACGGGGGCATTCG----TATTGCGAC-GCTAGAGGTGAAATTCTTGG

ACCGTCGCAAGACGAACTACTGCGAAAGCATTTGCCAAGAATGTTTTCATTAATCAAGAACGAAAGTTA

GAGGTTCGAAGGCGATCAGATACCGCCCTAGTTCTAACCATAAACGATGCCAACCAGCGATCCGCCTGA

GTTCCTCAAACGACTCGGCGGGCAGCTTCCGGGAAACCAAAGTGTTTGGGTTCCGGGGGAAGTATGGTT

GCAAAGCTGAAACTTAAAGGAATTGACGGAAGGGCACCACCAGGAGTGGAGCCTGCGGCTTAATTTGAC

TCAACACGGGGAAACTCACCCGGCCCGGACACTGGAAGGATTGACAGATTAAGAGCTCTTTCTTGATTC

AGTGGGTGGTGGTGCATGGCCGTT-CTTAGTTGGTGGAGCGATTTGTCTGGTTAATTCCGATAACGAAC

GAGACTCT--AGCCTATTAAATAGACG-------------A-CC-GATC--------------------

-A----CACGTGTCGG-TCGATC--TTCTTAGAGGGACAAGCGGCGTTTAGCCGCACGAGACAGAGCAA

TAACAGGTCTGTGATGCCCTTAGATGTCCGGGG-CCGCACGCGCGCTACACTGAAGGAATCAGCGTGTG

-ATTGCCCCTGTCCGGTAGGACTGGGTAACCC-GTTGAACCTCCTTCGTGATAGGGATAGGGGCTTGTA

ATTGTTCCCCTTGAACGAGGAATTCCCAGTAAGCACGAGTCATCAGCTCGTGTTGATTACGTCCCTGCC

CTTTGTACACACCGCCCGTCGCTACTACCGATTGAATGATTTAGTGAGGTCTTCGGACTGGCTGCTGGA

GCGGCTTTCGGGTCGC---GCCCGTGT--GCCGGAAAGATGACCAAACTTGATCATTTA

[28s nchar=295]

Annelida [X90688] CCTAGAGGCAGAGTGAAAGCAAAGGCCGTTCCTTGCGTTC

GGCCCG-----GGTAGGATCCCTCGT-CGCACGCGGCGGGGGCGCACT---ACCGGCCCGTCTCGGCCG

CCGTCTCGGCCGC--AACGTCGG-CGAGGCGGAGCGAGAGCGTACACGTTGGGACCCGAAAGATGGTGA

ACTATGCCCGAGTAGGACGAAGCCAGAGGAAACTCTGGTGGAGGTCCGCAGCGATTCTGACGTGCAAAT

CGATCGTCAAACTTGGGTATAGGGGCGAAAGACTAATCGAACCATCTA

Arachnida [AF124966] CCCAAAGGCGTAATGAAAGTGAAGACCGGTTCGGCCG---

-GTTGC-----CTTGGGATCCCGCGA-GCCTCGCGTTCGTGGG-------------CGCACCAAGGG-C

CCGTCCCGATCGC--CTCGTCGA-CGGGGCGGAGCGAGAGCGTACACGTTGGGACCCGAAAGATGGTGA

ACTATACCTGGGCAGGACGAAGCCAGAGGAAACTCTGGTGGAGGTCCGCAGCGATTCTGACGTGCAAAT

CGATCGTCAGACCTGGGCATAGGGGCGAAAGACTAATCGAACCATCTA

Branchiopoda [AF209047] CTCGAAGGCGAAATGAAAGTAAAGGCTCGGTTTC---CG-

AGCTGA-----GGGGAGATCCCG-TT-CTGCTTCTGTAGCGCGGG-----------CGCATCCCCGG-G

GCGTCTATACTGC--GTTGCCAG-TGAGACGAACCTAGAGCGTACACGTTGGGACCCGAAAGATGGTGA

CCTATGCCTGGCCAGGACGAAGCCAGGGGAAACCCTGGTGGAGGTCCGCAGCGATTCTGACGTGCAAAT

CGATCGTCGGAGTTGGGTATAGGGGCGAAAGACTAATCGAACCATCTA

Chilopoda [AF334292] CCCGAAGGCGTAATGAAAGTGAAGG-TCGGCAAATCGTC-

GACCAA-----GGCGGGATCCGTTTG-GGCTAACGGTTCGGCCGAGCCCGGT--GGCGCACCGCCGG-C

CCGTCTCGACTGC--AGCGTCAG-TGAGGCGGAGCAAGAGCATACACGTTGGGACCCGAAAGATGGTGA

ACTATGCCCGGGCAGGACGAAGCCAGAGGAAACTCTGGTGGAGGTCCGTAGCGATTCTGACGTGCAAAT

CGATCGTCGGACCTGGGTATAGGGGCGAAAGACTAATCGAACCATCTA

Diplopoda [AF173267] CTTAAGGGCAGAATGAAAGTGAAGGTCGACTTCTTTTCG-

GGTTGACCAGAGGTGGGATCCTGGTGAACGTGGCGACTCAGCAAACCTTTGCCAGGCGCACCGCCGG-C

CCGTCTCGACTGCTTATTGTCGG-TGAGGCGGAGCAAGAGCGTACACGTTGGGACCCGAAAGATGGTGA

ACTATGCCTGGGCAGGACGAAGCCAGAGGAAACTCTGGTGGAGGTCCGTAGCGATTCTGACGTGCAAAT

CGATCGTCAGACCTGGGTATAGGGGCGAAAGACTAATCGAACCATCTA

Hexapoda [AF370809] CCTAAAGGCGTAATGAAAGTGAAGGTCTCGCCTTGCGCG-

GGCCGA-----GGGAGGATGGGGCTT-CCCCGCCCTTAACGGGGCGGCGGCC--TCCGCACTCCCGG-G

GCGTCTCGTCCTC--ATTGCGAGGTGAGGCGCACCTAGAGCGTACACGTTGGGACCCGAAAGATGGTGA

ACTATGCCTGGCCAGGACGAAGTCAGGGGAAACCCTGATGGAGGTCCGTAGCGATTCTGACGTGCAAAT

CGATCGTCGGAGCTGGGTATAGGGGCGAAAGACTAATCGAACCATCTA

Malacostraca [AF169703] CCTATAGGCATAATGAAAGTGAAAGTT-TTCTCTGCGGA-

GACCGA-----GGGCCGATCCCGCGA-CTCCCTCTGTAGGGCCGGGC----GCAGGCTCGG-------G

ACTTGCACGCCCC--ATAGTGGG-CGGTGAGTACCAAGAGCGTACATGTTGGGACCCGAAAGATGGTGA

ACTATACCTGGTCAGGACGAAGCCAGAGGAAACTCTGGTGGAGGTCCGCAGCGATTCTGACGTGCAAAT

CGATCGTCGGAGCTGGGTATAGGGGCGAAAGACTAATCGAACCATCTA

Xiphosura [LPU91492] CCTAGAGGCGCAATGAAAGTGAAGGTCGGCCGGGCCGCC-

GACTGC-----GTTGGGATCCCC----GCCTTACGAGGTGGGG-------------CGCACCAACGG-C

CCGTCCCTGCCGC--TACGTCGG-CGGGGCGGAGTGAGAGCGTACACGTTGGGACCCGAAAGATGGTGA

ACTATGCCTGGGCAGGACGAAGCCAGAGGAAACTCTGGTGGAGGTCCGCAGCGATTCTGACGTGCAAAT

CGATCGTCAGACCTTGGTATAGGGGCGAMAGACTAATCGAACCATCTA

[enolase nchar=1108]

Annelida [Nereis macrydi] GACTTGAAGACGGATCGCGGTCTTTTCCGTGCTGCTGTGC

CAAGCGGTGCGTCCCATGGAATATACGAGGCTCTCGAGCTGAGAGACAAAGTCGCTAGCGAATTCCATG

GCAAAGGTGTGAAGAAAGCTGTCGAGAACGTGAACATGGTCATTGCCCCTGC-CCTGGTGGGCAAGTCG

GTCAATATGGCAAACCAGGTTGCCGTTGACAAGATTATGCTC-TTCTGGATGG-ACTGAGAACAAAGCC

AAGCTTGGTGCCAACGCCATCCTCGGAGTGTCCTTGGCCGTGTGCAAAGCTGGAGCAGCTCAAAAGGGT

GTTCCTCTGTACCGTCACATCGCTGACCTCGCGGTAACCCAC----TGGTCCTCCCAGTTCCAGCTTTC

AATGTGATCAACGGAGGGAGCCACGCTGGCAACAAATTGGCCATGCAGGAGTTCATGATCCTGCCTACT

GGTGCCTCATCATTCAAGGAAGCCATGAAGATGGGAACAGAAGTGTACCACCACTTGAAGAGTGTGATC

AAGTCTAAATACGGCCAGGATGCCTGCAATGTTGGAGATGAGGGAGGATTCGCACCAAACATTCAGAAC

AACTTCGAAGGTCTTGAGCTGTTGCGCATTGCCATTGAGAAGGCTGGCTACACCGGCAAGATCAAGATC

GGCATGGACGTTGCCGCTTCTGAGTTTTGCAAGGACAAGAAA---TACGACTTGGACTTCAAGAACCCT

CAGTCCGACCCTGCTCATTGGCTCTCATCGGAGCAGTTGTTCTCAGTGTACAAAGAGTTCATCGAGAAG

TACCCAGTGGTCAGCATTGAGGATGCGTTTGACCAGGATGACTGGGATGCTTGGACCATGATGAATGGT

GCCGTAGATATCCAGTTGGTCGGTGACGACTTGCTTGTGACCAATCCCAAGAGGGTCCAGATGGGTATC

GACAAGAAAGCTTGCAACTGCTTGTTGCTCAAAGTGAACCAGATCGGCTCCGTCACTGAATCCATCATG

GCCTGCAAGATGTCTCAAGCCCAGGGATGGGGAGTCATGGTGTCTCATCGCTCCGGAGAGACTGAAGAT

ACTTTCATCGCTGATCTCGTTGGGGTCTT----

Arachnida [Formictopus_sp] GATGTCACAACAGAGAAAGGTCTTTTCCGTGCTGCTGTAC

CAAGTGGGGCATCAACTGGAATCTATGAAGCCTTAGAATTGAGGGATGGTGACAAAAGCTCCTACCATG

GAAAGAGTGTGAGGAAAGCTATTGATAATGTCAACACACAAATTGCTCCTGC-ATTGATACAAAAGAAC

ATCTCCCCTACAGAGCAGACGCAAATTGATGAAATGATGATAGCATTGGACGGAACAGAAAACAAATCT

AAATTTGGTGCAAATGCTATTTTAGGAGTTTCTTTAGCTGTTTGCAAAGCTGGTGCTGCACATAAGGGT

GTGCCTTTGTACAAGCACATTGCTGAACTTGCTGGAAATAAAGATGTAATTCTTCCAGTACCAGCTTTT

AATGTCATCAATGGAGGCAGTCATGCTGGCAATAAGCTTGCCATGCAAGAATTCATGATTTTGCCAACA

GGAGCATCGACTTTCACAGAAGCCATGAAAATGGGCAGTGAAATTTACCATCATCTAAAGGCTGTAATC

AAGAAAAAGTTTGGTCTGGCTGCCACAGGTGTTGGTGATGAAGGTGGCTTTGCTCCAGACATCCAGGAA

AACAAAGAGGCCCTGGAACTCATCAAAGAAGCCATAGAAAAAGCTGGTTACACAGGGAAAATTGAAATT

GGTATGGATGTGGCTGCATCTGAATTTTATAAAGAGGGCAAA---TATGATCTTGACTTCAAAAATCCC

AACTCTGACAAGTCAAAGTGGTTAGAGCCTGATGCCTTGGCCCAGTTGTATTTGGACTGGATCAAAGAG

TATCCTATTGTATCTGTTGAAGATCCCTTTGACCAAGATGATTGGGATGCCTGGACCAAGTACTGTGCA

GCTGTAACCAACCAAGTTGTTGGGGATGATTTGACAGTTACAAATCCCAAGCGAATCCAAGTGGCTGTT

GAAAAGAAGGCCTGCAACTGTCTATTATTGAAAGTGAACCAAATTGGCAGTATTACTGAAGCTATTAAA

GCACATAACTTGGCAAAGTCCAATGGCTGGGGTACTATGGTTTCTCATCGTAGTGGTGAAACTGAAGAC

TCTTTTATTGGTGATCTGGTTGTTGGTCTCTGT

Branchiopoda [Daphnia_magna] GATTTGACCACAGAGAAAGGACTTTTCCGTGCTGCCGTTC

CATCTGGTGCATCCACTGGTATTCATGAGGCTCTTGAACTTCGTGATGAAATCAAGACCGAGTACCACG

GCAAAGGGGTGAAGAAGGCAGTTAGCAACATCAATGATAGCATTGCACCAGC-CTTGTTGAAAGAGAGT

TTCCAAGTTACTGAACAAGAGGCCATTGATAATTTTATGATCAAACTAGATGGCACAGAAAACAAATCA

AAGTTTGGTGCTAATGCAATTTTGGGAGTTTCTTTGGCAGTTTGCAAAGCTGGTGCAGCTCAGAAGGGC

GTTCCGCTCTACCGACACATTGCTGATTTGGCTGGAACTCCAGAGATTATTTTGCCAACTCCAGCTTTC

AATGTTATCAATGGTGGTTCTCATGCAGGCAACAAATTGGCTATGCAAGAATTCATGATTTTTCCTACT

GGTGCATCGTCCTTCACTGAAGCCATGCGCATGGGAACTGAAACTTACCATCATCTGAAGAAAGTTATC

AATAACCGTTTTGGTTTGGATGCGACTGCCGTTGGAGATGAGGGTGGCTTTGCTCCTAACATTTTGAAC

AACAAAGATGCACTTGAGCTCATCAGCACTGCCATCGAAAAAGCTGGATACACCGGCAAAATTGAGATT

GGTATGGATGTTGCCGCATCGGAATTTCACAAAAACGGAAAG---TACGACTTGGACTTTAAAAACCCA

GCATCTGACCCGGCTACCTACTTGGAATCCGCCAAGTTGGCCGAACTCTACCAAGAGTTCATCAAAGAG

TTCCCCATGGTCTCAATTGAAGATCCCTTCGACCAAGATGACTGGGCTGCTTGGACTAGTCTCACCGCC

AACACTCCTATTCAGATCGTTGGTGACGATCTCACGGTCACAAACCCCAAGCGTATCCAGACTGCCGTC

GATTGCAAAGCATGCAACTGCCTGCTCCTCAAGGTAAACCAAATCGGAACCGTGACTGAATCCATCCAA

GCTCACAACTTGGCCAAGGCTAATGGCTGGGGAACCATGGTCTCTCACCGCTCTGGTGAAACCGAAGAT

TCTTTCATTGGCGATTTAGTGGTTGGATTGTCA

Chilopoda [Lithobius_sp] GATGTCGAGACCGAGAAGGGTCTCTACCGTGCAGCTGTCC

CTAGTGGTGCCTCTACAGGCATTTACGAAGCTCTAGAGCTTCGTGATGGTGACAAGAGCATTCACCATG

GAAAAGGTGTCACAAAAGCTGTGGGGCATGTTAATGACTCCATTGCACCTGCTATTATTGCA-AAAAAT

TTTGATGTCACAAGTCAAAAGGAGATAGACGAGTTTATGCTGGCTTTGGATGGTACAGAAAACAAATCC

AAATTTGGAGCCAATGCCATTCTTGGTGTATCTTTGGCAGTTTGTAAAGCTGGTGCTGCTCACAAGGGT

GTTCCTCTTTACAAATACATTGCTGAGCTTGCTGGCAATGATAACATCGTCCTACCCGTCCCGGCTTTC

AATGTTATCAATGGTGGAAGCCACGCTGGGAACAAGCTGGCCATGCAGGAATTCATGATTCTGCCAACA

GGTGCTGCATCTTTTACGGAGGCAATACGAATGGGCACGGAAATTTACCATCACCTCAAGAATGTCATA

AAGGGAAAGTTTGGTTTGGATGCAACAAGTGTTGGTGATGAAGGTGGTTTTGCACCTAACATCCAGGAA

AATAAGGAAGCCCTGGAACTAATCAAGACTGCCATTGAGAAGGCTGGATACACGGGTAAAATTACCATT

GGTATGGATGTAGCAGCATCAGAGTTCTTTCGTGAAGGACAG---TATGACTTGGATTTCAAGAATCCA

AACTCAGACAAAAGTCAGTGGCTATCCCCTGAAAAATTGGGGGACTTGTATCGTAGCTGGGTGAACGAG

TACCCAATTGTGTCAATTGAAGTTCCTTTTGACCAAGATGATTGGAATGCATGGGCTCAACTCCATGCA

AGTGTACCAATACAGATTGTTGGGGATGACTTGACAGTCACTAATCCCAAGAGAATCCAGATGGCAGTT

GACAAAAAAGCCTGTAACTGTTTACTCTTGAAAGTGAATCAGATTGGTTCTGTGACTGAATCTATACAA

GCTCATTTGCTTGCGAAGAAAAATGGTTGGGGCACAATGGTGTCTCACCGTAGTGGTGAAACTGAAGAT

TCATTTATTGCAGATTTGGTTGTTGGACTGAGT

Diplopoda [Millipede_sp] GACCTCGTCACCGACAAAGGCTTGTTCCGTGCTGCCGTTC

CTAGCGGAGCATCCACCGGCATTTACGAAGCTCTTGAACTGAGAGATAATGACAAGGGCTCGTACCATG

GCAAAAGTGTTCTCAAGGCAGTTTCCAATGTAAATGATACAATTGTGCCAGC-ATTGTTGCCCAAAAAC

TTTAATATCACGAACCAGAAAGAGATCGACGACTTCATGCTTGCTCTTGATGGAACCGATAACAAAGGT

AAACTGGGCGCAAACGCTATTCTTGGAGTATCTTTAGCAGTTTGCAAGGCTGGTGCTGCTGAGAAGGGA

ATTCCT-TGTACAAGTACATCGCAGAATTAGCGGGCAATGACAACATCATTCTTCCAGTTCCAGCTTTC

AACGTCATTAATGGAGGAAGCCACGCAGGAAATAAATTGGCCATGCAGGAGTTCATGATTCTCCCCACG

GGAGCGTCTTCCTTCACCGAAGCAATGAAGATAGGTACAGAAGTCTATCATCATCTTAAGAATGTCATT

AAAGGCAAATTTGGCTTGGATGCAACGAGTGTCGGTGATGAGGGAGGGTTTGCTCCCAACATCTTGAGC

AATAAAGAGGCCCTGGAACTTATTAAGTTGGCTATCGAGAAATCTGGTTACACGGGAAAAGTGGAAATA

GGAATGGATGTAGCTGCATCAGAGTTTCACAAAGATGGAAAG---TATGATTTAGATTTCAAGAATCCA

AATTCCAACCCAGACGACTTCTTGACGCCAGACAAGTTAGCCGATTTGTATCGGGAATTCGTCAAAGAA

TATCCCATCGTTTCCATAGAAGATCCATTTGATCAAGATCATTGGGACGCTTGGTCAGCATTCCTTGCC

AGTGTGGAGATCCAGATAGTTGGAGATGATTTGACAGTAACTAACCCCAAACGAATTGAAACAGCTGTT

GAGAAGAAAGCTTGCAATTGCCTACTACTTAAAGTAAATCAGATTGGAAGCGTCACCGAGGCAATACAA

GCACATCTTTTAGCAAAGAAAAACGGGTGGGGAACCATGGTATCGCATCGTAGTGGAGAAACTGAGGAT

GCTTTCATTGCTGATCTTGTAGTTGGTTTAAGC

Hexapoda [X17034] GACCTGACCACCGAGCTGGGACTCTTCCGAGCCGCCGTGC

CCTCCGGCGCCTCCACTGGCGTCCACGAGGCCCTGGAGCTGCGCGACAACGACAAGGCCAACTACCATG

GCAAGTCGGTGCTGAAGGCCGTGGGCCATGTGAACGACACCCTGGGACCCGAGCTGATCAAG-GCCAAT

CTGGATGTGGTTGACCAGGCGTCCATTGACAACTTCATGATCAAGTTGGACGGCACCGAGAACAAGAGC

AAGTTCGGAGCCAACGCCATCCTGGGCGTTTCCCTGGCCGTGGCCAAGGCTGGAGCCGCCAAGAAGGGC

GTGCCGCTGTACAAACACATTGCCGATCTGGCTGGCAACAAGGAGATCATCCTGCCGGTGCCCGCTTTC

AACGTGATCAACGGCGGCAGCCACGCCGGCAACAAGCTGGCCATGCAGGAGTTCATGATCCTGCCCACC

GGCGCCACCAGCTTCACAGAGGCCATGAAGATGGGCTCCGAGGTGTACCACCACCTGAAGAATGTGATC

AAGGCCAAGTTCGGTCTGGACGCCACCGCTGTGGGCGATGAGGGCGGCTTCGCCCCCAACATCCAGTCC

AACAAGGAGGCTCTGAACCTGATCAGCGATGCCATCGCCAAGGCCGGATACACCGGCAAGATCGAGATC

GGCATGGACGTGGCCGCCTCCGAGTTCTACAAGGATGGCCAG---TACGATCTGGACTTCAAGAACGAG

AAGAGCGACAAGTCGCAGTGGCTGCCCGCCGACAAGCTGGCCAACCTGTACAAGGAGTTTATTAAGGAC

TTCCCCATCGTCTCGATTGAGGATCCCTTTGACCAGGACCACTGGGAGGCCTGGTCCAACCTGACCGGC

TGCACCGACATCCAGATCGTGGGCGATGATCTGACCGTGACCAACCCCAAGCGTATTGCCACCGCCGTG

GAGAAGAAGGCCTGCAACTGCCTGCTCCTGAAGGTCAACCAGATCGGCACCGTCACCGAGTCCATTGCC

GCCCATCTGCTGGCCAAGAAGAACGGCTGGGGCACCATGGTCTCCCACCGTTCCGGTGAGACCGAGGAC

TCGTTCATCGGTGACCTGGTCGTCGGTCTGTCC

Malacostraca [AF100985] GACCTCTACACCCACAAGGGCCTATTCCGTGCTGCTGTTC

CCTCTGGAGCATCCACAGGTGTCCATGAGGCACTGGAGATGCGTGATGGAGACAAGTCAAAGTACCATG

GCAAGTCTGTCTTCAAGGCCGTCAACAACGTGAACAGCATCATTGCTCCTGAAATTATTAAG-AGTGGA

CTGAAAGTCACTCAGCAGAAAGAGTGTGATGATTTCATGTGCAAGTTGGACGGCACTGAAAACAAGAGC

CGCCTTGGTGCCAATGCCATCTTGGGTGTCTCCCTGGCCATTTGCAAGGCTGGTGCTGCTGAGCTTGGC

ATTCCCCTCTACAGACACATTGCTAACCTTGCCAACTACTCCGATGTGATCCTGCCTGTGCCAGCCTTC

AACGTCATCAATGGTGGTTCTCACGCTGGCAACAAGCTGGCCATGCAGGAGTTCATGATCCTGCCCACT

GGTGCCACCAGCTTCACTGAGGCCATGCGCATGGGCTCTGAGGTGTACCATCACCTCAAGGCTGTGATC

AAGGGCCGCTTTGGTCTGGATGCCACTGCTGTTGGTGATGAGGGTGGCTTTGCTCCCAACATCCTGAAT

AACAAGGATGCTCTCACCCTGATTCAGGAATCCATTGAGAAGGCTGGCTACACTGGCAAGATTGAGATT

GGCATGGATGTGGCTGCTTCAGAGTTCTACAAGGGTGAGAACATTTACGACCTGGATTTCAAGACTGCC

AACAACGATGGCTCTCAGAAGATCACTGGGGACCAACTTAGGGACATGTATATGGAATTCTGCAAAGAG

TTCCCCATTGTTTCTATTGAAGATCCCTTCGACCAGGACGACTGGGAGAACTGGACCAAGATGACCTCT

GCCACCAACATCCAGATTGTTGGTGATGACTTGACTGTGACCAACCCCAAGCGCATTGCTACAGCTGTT

GAAAAGAAGGCTTGCAACTGCCTCCTCCTGAAGGTCAACCAGATTGGCAGTGTGACAGAGTCTATTGAT

GCTCACCTTCTGGCCAAGAAGAATGGCTGGGGCACTATGGTTTCCCATAGGTCTGGTGAGACTGAGGAC

TGCTTCATTGCTGATCTTGTTGTTGGTCTCTGC

Xiphosura [L_polyphemus] GACCTTACCACTGACAAAGGTATGTTCAGAGCAGCAGTCC

CAAGTGGAGCATCTACTGGAATATACGAAGCTCTTGAGCTTAGAGATGGAGACAAGACAAAATATCATG

GCAAAAGTGTTGGAAAGGCTGTTGACAATGTGAACAGTATTATAGCTCCAGC-TCTTTTGGCCAAGAAT

TTTGAAGCAACTCAGCAGGGGGAGATTGATGAATTTATGTTATCATTAGATGGAACAGAAAATAAAGCT

AAACTTGGAGCTAATTCTATTTTGGGAGTATCCTTGGCTGTTTGTAAAGCTGGAGCAGCACAAAAGAGT

GTTCCCCTGTACCGTCACATTGCTGACTTGGCTGGTTATGGAGATGTGATCTTGCCAGTCCCTGCTTTT

AACGTAATCAATGGGGGAAGTCATGCTGGTAACAAGCTAGCTATGCAGGAGTTTATGATCCTGCCAACT

GGAGCTAGCTCCTTCACGGAGGCCATGAAGATGGGTAGTGAGGTGTATCATCATTTGAAAAATGTCATC

AAGAAAAGGTTTGGTCTTCAGGCCACTGCTGTCGGAGATGAGGGAGGTTTTGCTCCTGACATCCAGAGC

AACAAGGAGGCCCTGGAACTTATAAAAGAAGCTATCCAAATAGCTGGTTATGTTGGTAAAATTGAAATT

GGCATGGATGTGGCTGCTTCAGAGTTCCATAAAGAGGGAAAG---TATGATTTGGACTTCAAGAATCCC

AATTCGGACTCTTCTCAGTGGCTCACACCTGATGCACTTGCTGCCATGTATCAAGAATTCATTAAAGAC

TACCCTATTGTATCTATTGAAGATCCATTTGACCAAAATCGCTGGGATGCTTGGACATCTTTCCAGGCA

GCTGTGCAGATTCAAGTTGTTGGTGATGATCTGACAGTAACAAACCCCAAGAGAATCCAAATGGCAGTG

GAAAAGAAATCTTGCTACTGTCTCCTGTTAAAAGTCAACCAGATTGGAAGTGTAACTGAAGCCATTAAG

GCGCATCAGCTAGCTAAATCAAACAACTGGGGAACAATGGTGAATCATCGTATTGGTGAAACTGAAGAT

ACAACCATTGCTGACCTGGTGGTTGGACTGTGC

[g3pdh nchar=889]

Annelida [Nereis macrydi] TCTGGTCCTCCGTGCCGCTCTGGCCAATGGTTTGGACGTT

GTTGCCGTCAACGACCCTTTCATTGACCTTGAATACATGGTGTACATGTTCAAGTATGACTCCACACAC

GGTCGTTACAAGGGAGAGGTCAAGCTCGATGGTGGAAAACTTATTGTTGACGGAAAGGCCATTGCCGTT

TTCCAGGAGATGAAGCCCACTGCCATCCCCTGGGGTAGCGCTGGAGCCGATTACGTCGTTGAGTCCACT

GGCGTCTTCACAACAATCGAGAAGGCCAAGGCTCACTTGGAGGGAGGCGCCAAGAAGGTTGTCATCTCT

GCCCCCTCTGCTGATGCCCCAATGTTCGTCATGGGCGTCAATGAAGAGAAGTACGAGCCATCCATGTCC

ATCGTCAGCAACGCCTCTTGCACCACAAACTGCCTGGCTCCCGTGGCGAAGGTCGTGAACGACAGCTTT

GGAATCGTTGAGGGTTTGATGACCACTGTCCACGCTTACACTGCCACCCAGAAGACCGTTGACGGTCCA

TCTGCCAAGGCCTGGCGTGATGGTCGTACGGCTGCCCAGAACATCATCCCCGCCTCTACTGGTGCCGCT

AAGGCTGTCGGCAAGGTCATTCCTGACCTCAACGGAAAACTGACCGGCATGGCTTTCCGTGTGCCCACT

CCCGATGTCTCCGTGGTTGATCTGACTTGCAAACTCAGCAAGGGGGCCTCCATGGATGAAATTAAAGCT

GCCGTCAAGGCCGCCGCTGAGG--GACCCATG-AAGGGAGTCTTGGGATACACAGAGGAGCAGGTCGTG

TCCTCCGACTTCATCGGAGATACTCACTCATCCATCTTTGATGCCAAGGCTTGCATTGCACTCACACCT

ACATTTGTCAAACTCATCTCC

Arachnida [Formictopus_sp] TCTTGTCCTTCGTGCATGCTTGGCTAAGGGAGTAAATGTT

GTGGCTGTGAATGATCCATTTATTGATGTCAAATACATGGTGTACATGTTCAAATATGACTCCACACAT

GGAAGATACAAGGGTGATGTTCATGAAGAGGGTGGAATGCTCGTGGTTGATGGACAGAAGATCCACGTC

TTCCAAGAGATGAAACCTGCTAGCATTCCATGGGGAAAAGTTGGTGCAGACTATGTTGTAGAATCTACT

GGTGTCTTCACTACAATTGAAAAAGCTTCGCCCCATATTGAAGGAGGTGCCAAGAAAGTAATAGTCTCT

GCACCATCTGCTGATGCACCAATGTTTGTCATGGGTGTCAACCATACTTTATATGAGCCATCTATGACA

ATTGTCAGCAATGCGTCTTGCACCACAAACTGTTTGGCACCTCTAGCTAAAGTCATCAATGACAATTTT

GGCATTATTGAAGGCTTAATGACCACCGTTCATGCTGTTACTGCTACACAGAAGACAGTTGATGGACCA

AGTGCTAAGATGTGGAGAGATGGCCGTGGTGCTGCTCAGAACATCATCCCAGCGTCCACTGGTGCAGCT

AAAGCTGTTGG-AAAGTTATTCCAGAATTAAATGGAAAACTGACGGGTATGGCCTTCCGTGTTCCTACT

CCTGATGTATCTGTGGTGGATCTGACTTGCCGCCTTAACAAAGAAGCAACATATGATGAAATCAAAGCT

GCTGTAAAGGCTGCATCTGAAAGTGACAACTGGAAGGGAATTTTGGGATACACTGAAGATGAGGTTGTG

TCATCTGATTTTATTGGAGATACCCATAGCAGTATTTTTGATGCAAAGGCTGGCATTTCTTTAAGCAAG

ACTTTTGTAAAACTTGTTTCC

Branchiopoda [AJ289783] CTTGGTGCTTCGCGCTTGCATCGAAAAGGGAGCTACGGTT

GTTGCCGTCAATGATCCCTTCATTACTCTTGACTACATGGTGTACATGTTCAAGTATGACTCTACCCAT

GGCCGCTTCAAGGGAGAAGTGAAGGAAGAAGGTGGCAAGCTTGTTGTCAATGGACATCACATTCAGGTC

TTCAGCGAGCGTGACCCCAAGAACATTCCATGGGGAGCAGCTGGAGCTGAATACGTTGTTGAATCTACT

GGTGTTTTCACCACTTTGGACAAGGCACAGGCTCACATTGATGGAGGAGCCAAGAAAGTTATCATCTCT

GCCCCATCTGCTGATGCCCCCATGTTTGTTGTTGGAGTCAACCTTGAAGCATATGATCCATCCATGAAG

ATTGTTTCCAATGCTTCTTGCACCACCAACTGCCTGGCTCCTCTGGCTAAAGTCATCAATGACAACTTT

GGTATCATTGAAGGCTTGATGACTACTGTCCATGCCATCACTGCAACCCAGAAAACCGTCGATGGACCT

TCCGGAAAGTTGTGGCGTGATGGCCGTGGTGCTGCCCAGAACATTATCCCTGCCTCTACTGGTGCTGCC

AAGGCCGTAGGTAAAGTCATTCCTGAACTGAACGGAAAATTGACCGGTATGGCTTTCCGCGTACCCGTC

CACGATGTCTCCGTTGTTGATCTGACCTGCCGCCTGTCCAAGGAAGCCAGCTACGACGAAATCAAGGCT

GTCGTTAAAGCAGCAGCTGAA---GGCCCGATGAAGGGTATTTTGGGCTACTGCGACGAGGAGGTCGTC

TCCACAGACTTCATTGGTGACAACCACTCTTCCATCTTCGATGCTGCTGCAGGCATTGCTCTCAACAAA

ACTTTCGTCAAGTTGATTTCA

Chilopoda [Lithobius_sp] TTTGGTCCTACGTGCTGCGTTGGACAAGGGTGCGGAAGTT

GTTGCCATCAATGATCCCTTTATTGATGTTAATTACATGGTTTACATGTTCAAGTATGATTCAACCCAT

GGCAGACATAAGGGAGACATTCACGAAGAAGGTGGCATGTTGGTAGTGAATGGACACAAGATTCACGTC

TTCCAGGAGATGAAGCCAAACAATATTCCGTGGTCAAAAGCTGGCGCCGAGTACATTATTGAGTCAACT

GGTGTTTTTACAACCCTAGACAAAGCTCAGACTCATTTCGAGGGTGGTGCTAAGAAGGTGATCATCTCT

GCACCATCTGCAGATGCCCCCATGTTTGTAATGGGCGTAAACCACGAAGCCTACGATCCCAACATGAAG

ATCGTTAGCAATGCTTCGTGCACAACCAACTGTTTGGCTCCTATGGCCAAAGTTATCAATGATAACTTT

GAAATAATTGAAGGCCTAATGACAACTGTTCATGCCATTACTGCAACTCAGAAGACCGTTGATGGCCCC

AGTGCAAAGTTGTGGCGTGATGGACGTGGAGCCCAGCAAAATATTATTCCTGCATCGACTGGTGCTGCC

AAGGCTGTTGGCAAAGTCATTCCTGACTTAAATGGGAAACTGACTGGCATGGCATTCCGTGTCCCTACC

CCAGATGTGTCGGTAGTTGATTTAACTTGCCGCATTAAGAAAGAGGCAACTTACGAAGAAATCAAGGCA

GCAGTCAAATCTGCAGCAGAAAGTGATCACTGGAAAGGAATTTTGGGTTACACTGAAGATGAGGTGGTA

TCTTCCGACTTTATTGGAGATTCTCACAGCTCAATCTTTGATGCCAAAGCTGGCATTTCTCTGAACAA-

AATTTTGTGAAGCTTATTGCC

Diplopoda [Millipede_sp] TTTGGTTGTCAGGGCAGCTCTAGAGAAGGGTGCTGAAGTT

GTTGCCATTAATGACCCTTTCATTGATGTTAACTACATGGTGTATATGTTCAAATATGATTCCACACAT

GGTCGTTTCAAAGGAGATATTCATGAGGAAGGTGGAATGCTGGTTGTGAATGGCCATAAAATCCACGTT

TTTCAAGAAATGAAACCTGCCAGTATTCCTTGGTCAAAAGCTGGTGCAGAATATGTCGTAGAATCCACT

GGAGTTTTTACAACCATTGAGAAAGCACAGTTACACTTTGAAGGCGGGGCTAAGAAGATAGTCATCTCT

GCTCCTTCTGCTGATGCTCCCATGTTTGTTATGGGAGTCAACCATGAGTCTTATGATCCAGGAATGACT

GTAGTGAGCAATGCATCTTGCACCACCAATTGTCTGGCACCACTTGCAAAAGTGGTAAATGACAATTTT

GAAATAGTTGAAGGTCTGATGACCACTGTTCATGCTGTGACTGCTACTCAGAAGACTGTAGATGGTCCT

TCTTCAAAGATGTGGCGAGATGGTCGTGGCGCCCATCAGAATATTATCCCAGCGTCCACTGGAGCTGCA

AAAGCTGTTGGAAAGGTTATTCCTGATCTGAATGGAAAACTGACTGGCATGGCATTCCGTGTCCCAGTC

GCAGATGTATCTGTTGTGGACTTAACTTGCCGTATTAAGAAAGAGGCTACGTACGATGAAATTAAAGCT

GCTATTAAAGCTGCTTCAGAGAGTGACAATTGGAAAGGAATCTTGGGCTATACTGAAGACGAGGTTGTT

TCATCAGACTTTGTTGGAGACACGCATAGCTCCATTTTTGATGCAAAAGCTGGAATTTCTCTGAATAAG

AACTTTGTGAAACTCATCTCA

Hexapoda [BT004485] CTTGGTGCTCCGCGCCGCCATCGATAAGGGCGCCTCCGTG

GTGGCCGTCAACGATCCCTTCATCGATGTCAACTACATGGTTTACCTGTTTAAATTCGACTCGACTCAC

GGTCGTTTCAAGGGCACCGTTGCGGCTGAGGGCGGATTCCTGGTGGTGAACGGCCAGAAGATCACCGTG

TTCAGCGAGCGCGACCCGGCCAACATCAACTGGGCCAGTGCTGGAGCCGAGTATGTGGTGGAGTCCACC

GGAGTGTTCACCACCATTGACAAGGCGTCCACCCACTTGAAGGGCGGCGCCAAGAAGGTCATCATCTCG

GCCCCATCCGCCGATGCGCCCATGTTCGTGTGCGGCGTTAACCTGGACGCCTACAGCCCCGACATGAAG

GTGGTCTCCAACGCCTCGTGCACCACCAACTGCCTGGCTCCCCTGGCCAAGGTCATCAATGACAACTTC

GAGATCGTCGAGGGTCTGATGACCACCGTGCACGCCACCACTGCCACCCAGAAGACCGTCGACGGTCCC

TCTGGCAAACTGTGGCGCGATGGACGTGGCGCCGCCCAGAACATCATCCCGGCCGCCACCGGAGCCGCC

AAGGCTGTGGGCAAGGTCATCCCCGCCCTGAACGGCAAGCTGACCGGCATGGCTTTCCGCGTGCCCACG

CCCAATGTCTCCGTTGTGGATCTTACCGTCCGCTTGGGCAAGGGAGCCACCTATGACGAAATCAAGGCT

AAGGTCGAGGAGGCCTCCAAGG--GACCCCTG-AAGGGAATCCTGGGCTACACCGATGAGGAGGTGGTC

TCCACCGACTTCTTCAGCGACACCCATTCGTCTGTGTTCGACGCCAAGGCTGGCATTTCGCTGAACGAT

AAGTTCGTCAAGCTAATCTCG

Malacostraca [C_sapidus] TCTGGTACTTCGTGCTGCTCTGCTGAAAGGCGCCGAGGTT

GTGGCTGTGAATGATCCTTTCATTGCCCTGGACTACATGGTTTACATGTTCAAGTATGACTCCACCCAT

GGCGTGTATAAGGGTGAGGTGAAGGCAGAGGATGGAGCTCTGGTTGTTGATGGCCACAAGATTACTGTA

TACAATGAGATGAAGCCCGAGAACATTCCATGGAGCAAGGCTGGCGCTGAGTATGTTGTGGAGTCCACG

GGTGTGTTCACCACTATTGAGAAGGCTTCTGCTCATTTCACTGGTGGTGCCAAGAAGGTTATCATCTCT

GCTCCTTCAGCTGATGCACCCATGTTTGTGTGTGGTGTGAATCTGGAGAAGTATTCTAAGGACATGAAG

GTGGTCTCCAATGCCTCCTGCACCACTAACTGCCTGGCACCAGTTGCCAAGGTACTTCATGATAACTTT

GAGATTGTCCAGGGTCTCATGACCACTGTACATGCTGTTACTGCCACCCAGAAGACTGTTGATGGACCC

TCTGCTAAGGACTGGCGTGGTGGCCGTGGTGCTGCACAGAACATCATCCCATCCTCCACTGGTGCCGCT

AAGGCTGTAGGCAAGGTCATCCCTGAGCTGAACGGAAAACTTACCGGCATGGCCTTCCGCGTCCCCACC

CCTGATGTGTCTGTGGTTGACCTGACTTGCATTCTGGGAAAGGATTGCTCTTATGATGATATCAAGGCT

GCCATGAAGGCTGCTGCTGAG---GGTCCCCTCAAGGGTGTCCTGGGATACACTGAGGATGATGTTGTC

TCCTGTGACTTCACTGGAGATGAGAGGTCCTCTATCTTTGATGCCAAGGCTGGAATTCAGCTGAGCAAG

ACCTTTGTCAAGGTTGTTTCC

Xiphosura [L_polyphemus] CCTAGTTCTCCGT-TTTGTTTGGAGAAAGGAATTGAAGTT

GTAGCTGTTAATGATCCTTTTATTGATGTTAATTACATGGTTTACATGTTCAAGTATGATTCTACACAT

GGTCGTTACAAAGGTGAAATCCGAGCTGAAGGAGGAATGCTGATTGTTGGTGGACAGAAAATCCATGTT

TTTCAAGAGATGAAACCTAGTGCCATTCCATGGGGAAAAATTGGTGCAGAATATGTTGTGGAATCAACT

GGAGTTTTCACAACATTAGAGAAAGCAAAACCACACATTGAGGGAGGGGCCAAGAAGGTTATCATCTCT

GCACCTTCAGCTGATGCTCCCATGTTTGTCATGGGTGTGAACCACGAAAAGTATGATCCTACAATGGAA

ATCGTCAGTAATGCATCTTGTACCACCAACTGTTTAGCTCCCCTTGCTAAGGTCATCAATGATAACTTT

GGTATTGTTGAAGGGCTTATGACCACAGTTCATGCTGTTACAGCCACCCAGAAGACCGTTGATGGACCA

AGTTCTAAGGCATGGCGGGATGGTCGTGGGGCCAATCAAAATGTCATTCCTGCTTCAACAGGAGCTGCC

AAGGCTGTGGGTAAAGTTATTCCAGAATTAAATGGCAAACTGACTGGCATGGCTTTCCGTGTCCCTGTT

TCCGATGTCTCTGTTGTGGATCTGACTTGTCGGCTTGCTAAGGAAGCCTCTTACGATGAAATTAAAGCT

GCAGTAAAAGCTGCTTCTGAAAGTGACCAGTGGAAAGGGATCTTGGGATACACAGAAGATTCAGTTGTG

TCATCAGATTTTATAGGCGATTCTCACAGCAGCATATTTGATGCTGCAGCAGGTATTTCACTGAACAAA

AACTTTGTGAAGCTGATTTCA

[h3 nchar=296]

Annelida [AF185251] GGAGGCAAGGCCCCCAGGAAGCAGCTGGCCACCAAGGCTG

CCCGTAAGAGCGCCCCGGCCACCGGAGGTGTGAAGAAGCCCCATCGTTACAGGCCCGGAACCGTCGCTC

TCCGTGAGATCCGTCGTTACCAGAAGTCCACCGAGCTGCTCATCCGCAAGCTCCCCTTCCAGCGTCTGG

TCCGTGAGATCGCCCAGGACTTCAAGACCGATCTGCGCTTCCAGTCCTCTGCCGTCATGGCTCTGCAGG

AGGCTTCTGAGGCTTACCTGGTTGGTCTGTTCGAGGACACCAACCTGTG

Arachnida [AF110877] GGTGGGAAGGCACCAAGAAAGCAGCTTGCGACCAAAGCTG

CTAGGAAAAGCGCTCCAGCTACAGGAGGTGTGAAGAAACCTCATCGTTACAGGCCTGGTACAGTAGCTC

TGCGTGAGATTCGTCGCTACCAGAAATCGACTGAATTGTTGATCAGGAAACTACCATTCCAACGGTTGG

TTCGTGAGATCGCCCAGGATTTCAAGACTGATCTTCGATTTCAGAGCTCTGCAGTAATGGCACTTCAGG

AAGCTAGTGAGGCCTATCTTGTTGGCTTGTTTGAAGATACTAACCTTTG

Branchiopoda [AF110870] GGCGGAAAGGCCCCCAGGAAGCAGCTCGCAACCAAGGCTG

CGCGCAAGTCGGCCCCCGCCACCGGAGGGGTCAAGAAACCCCATCGCTACAGGCCCGGAACAGTCGCCC

TCCGAGAGATCCGCCGCTACCAGAAAAGCACCGAGCTTCTCATCAGGAAGCTTCCCTTCCAACGGCTCG

TCAGGGAAATCGCCCAGGACTTCAAGACCGACCTTCGCTTTCAGAGCTCGGCTGTCATGGCCCTACAGG

AGGCGAGCGAGGCCTACCTCGTCGGACTCTTCGAGGACACCAACCTCTG

Chilopoda [AF110853] GGTGGAAAAGCTCCCCGTAAACAACTGGCAACCAAGGCCG

CTCGTAAGAGTGCACCAGCCACCGGAGGAGTGAAGAAGCCCCATCGTTACAGGCCCGGAACAGTCGCTC

TCCGAGAAATCCGTCGTTACCAGAAGAGCACCGAATTTTTGATCCGCAAGTTGCCCTTCCAGCGCTTGG

TCCGTGAAATCGCTCAGGACTTCAAGACCGATTTGCGTTTCCAGAGCTCCGCTGTCATGGCTCTGCAGG

AAGCATCCGAAGCTTACTTGGTGGGTCTTTTTGAGGACACCAACTTGTG

Diplopoda [AF110859] GGTGGAAAAGCGCCAAGGAAGCAGCTTGCCACAAAGGCGG

CAAGGAAAAGTGCCCCTGCAACTGGCGGAGTGAAAAAGCCCCATCGCTACAGGCCTGGAACAGTTGCTC

TGCGTGAAATTCGTCGTTACCAGAAAAGCACCGAGCTGTTGATCCGCAAGCTGCCCTTCCAGCGTTTAG

TTCGAGAAATCGCGCAGGACTTCAAGACAGACCTTCGTTTCCAAAGTTCTGCTGTGATGGCCCTGCAGG

AAGCAAGCGAGGCTTACTTGGTTGGTCTATTTGAAGACACCAACTTGTG

Hexapoda [AF370817] GGCGGAAAGGCGCCGCGCAAACAGCTCGCCACCAAGGCGG

CGAGGAAGAGCGCGCCCGCCACCGGCGGCGTCAAGAAGCCCCACCGCTACCGGCCCGGAACCGTCGCGC

TCCGAGAAATCAGGCGCTACCAAAAGAGCACCGAGCTGCTCATCCGCAAGCTGCCCTTCCAGCGCCTCG

TGCGAGAGATCGCACAGGACTTCAAGACCGACCTGCGCTTCCAGAGCTCCGCCGTCATGGCGCTGCAGG

AAGCCAGCGAGGCCTACCTCGTCGGCCTCTTCGAAGACACCAACCTGTG

Malacostraca [AF110869] GGAGGCAAAGCCCCTCGCAAGCAGCTCGCCACTAAGGCTG

CGCGCAAGTCGGCGCCTGCCACTGGCGGAGTGAAGAAGCCCCATCGTTACCGCCCAGGTACCGTTGCTC

TTCGTGAAATCAGGCGCTACCAAAAGAGCACTGAATTGCTCATCCGCAAGCTGCCTTTCCAGCGTCTCG

TGCGTGAAATCGCACAAGACTTCAAGACTGACCTGCGCTTCCAGTCATCAGCCGTTATGGCTCTTCAGG

AAGCCAGCGAAGCCTACCTCGTTGGTCTTTTTGAAGACACAAACTTGTG

Xiphosura [AF370813] GGCGGAAAAGCACCAAGAAAACAACTGGCCACTAAAGCTG

CTCGTAAGAGCGCTCCAGCCACGGGAGGTGTAAAGAAACCTCATCGTTACAGGCCCGGAACTGTAGCCC

TTCGTGAAATCCGTCGTTACCAGAAGTCAACTGAGCTGCTCATCAGAAAACTCCCTTTCCAGAGACTGG

TGAGAGAAATCGCCCAGGACTTCAAGACTGACCTGAGATTCCAGAGCTCTGCTGTCATGGCTCTTCAGG

AGGCCAGTGAGGCATACTTGGTGGGTCTCTTCGAAGACACTAACCTGTG

[RNA POL II Nchar=582]

Annelida [U10336] CGTCGTCTAATCAAAGCAATGGAAAGTGTCATGGTAAAGT

ATGATGGTACTGTTAGGAACCAGATCGAACAGCTGATTCAATTGCGTTACGGAGAGGATGGATTGGCCG

GCGAGTGGGTGGAGTTTCAAAATCTACCGTCACTCAAACCGTCAAATAAGGCGTTTGAGGCCGGATTTA

AATTTGATCCGACCAATGAAAAACACCTTAAGAATTACCTGGACGAAGATATATTAAARTCATTAAAYG

GYGATGCTAATGTTATTGCTGAAGTTGAGAGTGAGTATAAACAATTACTCGAGGATCGTACTGCAATTA

GACAGATTTTCCCGTCTGGTGATAGCAAGATTGTCCTTCCTTGTAATTTACAAAGACTTATATGGAATG

CACAGAAGATATTTAGAATCCACACGAGAAAACCATCCAACCTACATCCTGTCAAAATTATCGAAGATG

TACGAGAACTGAGTAAAAAGTTTATGATTGTTAAAGGGGAGGACAGACTTAGCAAAACTGCTAATACTA

ACGCCACATTACTCATGAACATTTTAGTTAGATCAACTCTATGTTCCAAAAGGGTCATT

Arachnida [U90035] AGACGACTGATCAAAGCTATGGAGAGTGTAATGGTAACTT

ATGATGGYACTGTAAGAAACAGCACTGGACAGGTTATTGAGCTCCGTTATGGAGAAGATGGACTAGATG

GTGGAATGGTGGAATTCCAGCATTTGCCAACACTGAAGCCATCTGACAAAGCTTTTGAAAAGCGATTCA

GATTTGATGCCGCAAATGAAAGGTATTTGAGACGTATTTTTACAGAAGATGTGGTTAGAGATCTCCTTG

GAAGTAGCACAGCATTAAGTGAATTTGAAAAGGAGTGGGAGAGGCTGAAAACTGACAGAGAAGTGCTGA

GAATCATCTTTCCAACAGGCAACAGCAGAGTGGTKTTRCCTTGCAATCTACTGAGAATGATATGGAATG

CTCAGAAAATTTTCCATGTGAATACTAGAGCTCCCACAGATCTCAGTCCATTGAGAGTCATACATGGTG

TTGAGGAACTTGTGAAGAAACTGGTTATTGTACCTGGAGAAGATCGACTYAGCATTCAAGCAAATGAAA

ATGCCACAATCTTATTTAGAGCACTCCTCCATTCCACACTGTGTACAAAAAGAGTTGCT

Branchiopoda [U10331] CGTCGTCTCATCAAAGCTATGGAAGCCTGTATGGTTGCCT

ATGACGGGACTGTCCGTAACTCAGTTGGTCAAGTTATTCAGCTTCGATACGGTGAAGATGGTCTGGCCG

GGGAATTAGTAGAATTTCAATCTCTTCCTACTATCAAACTATCAAATCGGGCTTTTGAATCAAAATATC

GATTTGATCCAAGCAATGAGCGTCAGTTGAGAAAAACTTTTACAGAAGATGTGACGAAAAGTCTGCTTG

GAGATTCTGAGGTGATTACAGAGATTGAAAAGGAGTGGGAGGCGTTGGTTAAGGACAGGGAAGCCTTGA

GGAAAGTGTTTCCAAGCGGTGAAAATAAAGTTGTACTGCCCTGTAATCTCCAGAGAATGATTTGGAATG

CACAGAAGACGTTTCATATTAATAAGAGAATGCCCTCCGATTTGTCGCCTTTACGTGTTATTCAAGGTG

TTCGAGACCTTTTGAAAAATTGTGTTATTGTCAACGGAGAAGACAAACTATCAAAACAGGCCAACGAGA

ACGCCACACTTCTGTTCCAGTGTCTCGTACGGTCGACTCTTTGTACGAAACGACTTGCT

Chilopoda [AF139006] CGTCGTCTTATAAAGGCTATGGAGAGCATAATGATTACAT

ATGATGGAACTGTGCGTAACAGTGTTGGTCAGCTTATTCAGTTGCGATATGGAGAAGATGGTCTTGATG

GAGGAGCTGTGGAATTTCAGACATTGCCTACTCTAAAGCCTTCAAATAAAGCTTTTGAGAAGAAATTCA

AATTTGACATTTCAAATGAAAGGCAATTAAAGAAAATATTCAATGAAGATATAGTGAAGGAATTGATGG

GCAGTGCTAACATTGTTGGTGAATTAGAAAAAGAATGGGAGACTTTAAAAAGGGACCGGGAAACATTGC

GACAAGTTTTCCCCAAAGGAGATAGTAAAGTTGTATTACCATGCAATTTACCTCGTATGATTTGGAATG

CACAAAAAATTTTCCACATCAATACTAGAGTGCCTACAGATTTAAATCCATTCAGAGTCATTGAAGGTG

TTAGAGAATTGGTGAAAAAGATTGTAATTGTGCAAGGAGAGGATCCGTTGAGTCGAATGGCTAATGAAA

ATGCAACACTGTTGTTTGACTGTTTGCTTCGTTCTACCTTATGCACAAARAGAGTGGCC

Diplopoda [AF139001] CGTCGGCTGATCAAAGCTATGGAGTCGGTGATGGTGACGT

ACGATGGCACAGTGCGAAACAGCGTCGGACAGCTCATTCAGTTGCGTTACGGCGAGGACGGCCTAGATG

GGGGCGCCGTGGAATTCCAGGCCCTSCCTACCCTGAAACCATCCAACAAGGCGTTCGAGAAAAAGTTCC

GCTTTGACGCCAGCAACGAAAGGCAATTACGCCGTGTTTTTAACGAAGAGATCGTGAAGGACCTGTTTG

GCAGCGCCTCGGCYGTTGGGGAGCTGGAAAGAGAGTGGGAMACGTTGAAATTGGACCGAGAGGTGCTSC

GGACSATTTTCCCAAAAGGCGACAGCAAGGTCGTGTTGCCCTGTAATCTTCAAAGGATGATCTGGAACG

CRCAAAAGATTTTCCACATCAACGTCCGCACGCCCACCGATCTCAGTCCGCTGCGAGTTATTGAAGGGG

TGCGAGATCTGACGAAAAAGCTGGTGATTGTCGTGGGTGAAGACGCCCTGAGTAAGCAGGCCAACGACA

ACGCCACTTTGCTGATCAACTGCTTAATTCGGTCGACACTGTGCACCAAACGAGTGGCC

Hexapoda [U90040] CGACGTCTGATAAAGGCTATGGAGTCTGTCATGGTTCATT

ATGATGGAACAGTGCGTAACTCTGTGGGCCAGTTGATTCAGTTACGTTATGGTGAAGATGGTCTGTGTG

GTGAAACTGTAGAGTTTCAGAATCTGCCTACAATCAAACTATCAAATAAGGCATTTGAGAAGAAGTTCA

AATTTGATCCTACCAATGAAAGATATTTGCGTAGAATATTCAATGAAGACATTCTCAAGGAACTGATGG

GTAGTGGTGATGTAATCTCAGAATTGGAAAAAGAGTGGGAACAGCTTGTGAAGGACCGTGAAGCACTAA

GACAGATCTTCCCAAGTGGAGAGAGCAAAGTTGTATTGCCATGCAACTTACAGCGTATGATATGGAATG

TGCAGAAGATCTTTCATATCAATAAACGTGCTCCAACAGATTTGAGTCCATTAAGGGTTATTCAAGGTG

TCAGCGATCTCCTGAAGAAGTGCATCATTGTGGCTGGAGACGACCACCTCAGCAAGCAGGCCAATGAGA

ACGCAACATTGCTCTTCCAGTGTCTTGTGCGCTCAACACTGTGCACTAAATGTGTGTCT

Malacostraca [AF138970] CGTCGTTTGATAAAAGCTATGGAAAGCGTTATGGTAAACT

ATGATGGAACTGTAAGAAACAGTGTTAGTCAAGTTATTCAGCTTAGATATGGTGAAGATGGGTTGGCCG

GAGAATATGTAGAGTTCCAGAAAATGCCAACTGTCAAATTATCTTACAGAAGATTTGAAGATAAATACA

GATTTGATGTAACCAATGAAAGATATCTAAGGCATTTATTTAATGAAGACGTTGTGAGAGAGCTTCTTG

GCTCACCAGAAGCCATTAATATTTTAGAAGTAGAATGGCAGAAACTTCAAGAAGATAGAGTAGCTCTTC

GACAGGTTTTTCCAAAGGGAGACACTAAGGTTGTGTTGCCTTGCAATCTTGAACGTATGATTTGGAATG

TTCAAAAAATTTTTCATATCAATAAAAGAATGCAGACAGATTTATCTCCTATAAAAGTTGTTGAAGGAG

TTAATGAAACATTAAGGAAATGTATGATCGTGTCAGGGGAAGATCGAATCAGTGTTCAAGCAAATGAAA

ATGCTACTCTTCTCTTTCATTGCTTAGTTCGATCCACTCTGTGTACTAAAAAAGTGTCT

Xiphosura [U90037] CGACGTTTAATCAAAGCTATGGAAAGTGTAATGGCTACTT

ATGATGGAACTGTGAGAAACAGCACTGGGCAGGTGATTCAGTTGAAGTATGGAGAAGATGGTTTAGATG

GGACAGCTGTAGAAGTTCAGTCACTACCAACACTGAAACCTTCAGATAAAGCATTTGAGAAGAAGTTTA

GGTTTAATGCATCCAATGAAAGGTATTTACGACGTATCTTTACTGAGGATGTAGTGAGAGACTTGATGG

GCAGTGCCACTGCACTGAGTGAACTAGAGAAAGAATGGGAAAAACTGAAACATGACAGGGAATTATTGA

GGGCCATTTTCCCTACAGGTGATAGTAAGGTAGTTCTACCTTGTAACCTTCAGAGAATGATCTGGAGTG

CACAGAAGATTTTTCATGTCAATCAGAGAGCCCCTACAGATTTAAGTCCTTTGAAAGTGATTGGAGGTG

TCGAAGAACTTGTGAAGAAGCTAGTGGTGGTGCCTGGTGAAGATAGGCTGAGTATCCAGGCTAATGATA

ATGCAACAATACTTTTCCGTGCCTTGCTGAGATCAACCCTTTGTGCTAAGCGTGTTGCT

[MITOCHONDRIAL GENES]

[Note: accession numbers refer to the complete mitochondrial genome. Accordingly, they are the same for all the genes of all the considered taxa]

[12s rRNA nchar=842]

Annelida [NC_001673] CTAATATACATGTAAGTCTAAGCTACCCCGCACCACATAT

AAACCCTAAATGGAGAATAACTATATTAGACATATCTCATATGGTAAAGCGTCACAGTAAGAAAATCTA

CCTTATTGCAAAAGCAAGAGCTGGTTATTAAGATCAGAGTTGGCAATATTCGTGCCAGCTGCCGCGGTT

AGACGATAAACTCAAGCT----AATTCATATAAG-ACTAATTGC-AAGGCGATCTAAAAAATAACTC--

------------------AAAGTCTAATTTATATAATCCGA-GACCCGTAAACGCC--------TATTT

ACCGTAAAACCA---------TAGACTAAAACACGGATTAGATACCCGTCTATTTATGGAGTAACTAA-

-------AGTCGAAAAATACGAACTA--CAGTTTAAAACTTAAAGATTTTGGCGGTGTCTTA-TCAACC

CAGGGGAACCTGTCTCATAACTCGATAACCCACGA-CACTCTCACCCTCCCTAGACTAAA----CAGCT

TGTGTACTGCCGTCGTAAGCACACCTCTAAAA-GCCAAGGAAGTGTGCAATAATGATTGTCTCACCCAC

GTCAGGTCAAAGTGCAGCCCATGGACGGAGAT-----GATGGGTTACACC----TAAACAAAGATACGG

AATACAGCATTAAGAGCTGTGTAAAGGAGGACTTGAGTGTAACAGTATTACAAAATTAAA---GTGAAT

CTGAATCTAAGACATGCACACATCGCCCGTCACTCTCGCCTAAAGG----------------------C

GAGATAAGTC-GTAACAAAGTAGGTGTAACGGAAGTTGCCCCT

Arachnida [NC_004370] T---AGTTTGTATTAAAATAATTTAAACT-TTCTTTA--T

-ATTATATAATATATATTTTTTGAAAATAGAAG-----AAAAATTTATACTT--TTAAAAAAATAAA-G

TAGAAGTTTAAAAAG-ATGATT------------TGGC-----TAAA-CTTGTGCCAGCCGCCGCGGTT

ATACAAGTGAATCATTTT---TAAAAAAATTAAA-AATAATAAA-AATATAAATTAAATTTTATAATTT

TAA--------------AAAGGTGAAAT--------TTATA--ATCTTTATATTAA--TTAGTTTGATT

TTAAAAAAATTT---------AATTTTTAAACTAGGATTAGATACCCTATTAT------TTTAAGCTG-

------TATGTTGGTAGTAAGTAAAATTTAT---GAAATCATAAAATTTTGGCGGTATTTTAAGCTTGT

TAGAGGAATTTGCTCTGTAA-TGGACACAACGCCTAG-ATCTTACTTAATTTGGTATTAAAAGTCAGTT

TGTATACCACTATATTTAATTATATTGAGTAGTTATATTTAAGATTTTTAAA-ATAA---AAAAAATAT

ATTAAGTCAAGGTGCAACTAATAATTATGAAT---GAGGTGAATTACATTA-ATTTT-AATGT-TATTA

TAATATTGAAAAAGAAATTTTTTA----GGATTTAATAGTAAAATGTTAATATA-ATGAATATTTGAAT

AAAGCTCTAAAATATGCACATATCGCCCGTCGCTCTCAGCAGT--------------------------

GAGATAAGTCAGTAACAAAGTAAAAATACTGGAAAGTGTTTTT

Branchiopoda [NC_000844] TTAGGGAAAGTTTGAATCTGGCTTTGGCTCTATTTTGAGT

TAAATCTATATATAAACAGGGGATTTAAATAAAACAATAAGTAGTAGTAAGT--TTTAGGAAACAAATA

TTTGGGCCTAGTTAAACTCATAGAAT--------TGAC------TAAAATCGTGCCAGCCGTCGCGGTT

AGACGAAGAATTTTAGTAGAGTAAAAGTTTTGTTTAGTTAACATTCGATCTCGTAAAAGATGGTGAAAT

TT---------TGTTGATAAGGTGAAATTTTTAATTTAAGGGAAATTCTTAAGAAA----TCTGTTGAG

ACTAAAAAATTT---------AGGTAAAAAACCAGGATTAGATACCCTGTTAT------TCTAAATAAT

AGTG-TAAATAGGGTAGTAAAAGTTGTTCTT---CAAACCCAAAGATTTTGGCGGCATCTTATCCTAA-

TAGAGGAGCTTGTCCTATAA-TTGATAGTCCCCATTTTATCTTACCCTTTTTTGTTA--------AGCT

TGTATACCGCCGTTGTCAGATTACTTTA--------AAAGAACGTTTTCAGGAAAAATATTTTTCTTAC

TTCAGGTCAAGGTGCAGTTTATAAAAGGGCA----GTGATGAGCTACAATT--TTTAATAGAAATACGG

ATTTTAGGCTTAAAACTCAGGTGAAGGTGGATTTATTAGTAAATTTACTTAAGTACAGTAAG-TTGAAT

AAGGCAATAGGATGTGCACATATCGCCCGTCACTCTCTTCTCAAGAG----------------------

GAGATAAGTC-GTAACAAAGTAGATGTACTGGAAAGTGCATCT

Chilopoda [NC_002629] TTCCATAAAGTTTGGCTCTGGCTT--GTT-AACTTGCATT

TTTTGTTTTTTACATACAAGAGT----AAGTATTTTGTAGTGCTTAATA-------TTAAATAATTAGA

TATAGATTTAGAATAA----AAGTGTTA-----GGAGT-----CTAAGGTTGTGCCAGCAGACGCGGTT

ATACTATCTCCT-ATGTA----AGTTTTTTATAATAAGAAGTTTTTATATTTAATAAAGTTTTTAATGG

TTA---------TTCATGCGG-TGAAATGCATAATGTAATT-TATTTTTGATCTAAATAATTTTAATAA

GCTTTCAGCTTT---------A-TAAATAAACCAGGATTAGATACCCTGTTATTGTAAATTTAAATTAT

-----TT---TAAGTAGTATAAG-----TAA-TTGAAACTTAAAGAGCTTGGCGGCGTTTTAGGCAATC

TAGAGGAATCTGTATTTTAA-TCGATAGTCCACGAATTACCTTACCAGGGTTAGTATTTGA---TAATT

TGTATACCGTTGTTGTTAATTGAA---CTTAA--AGGTTG---CTTTTAGTATTTTT-GTTAAAATTAT

GACAAATCAAGGTGCAGTTAATTTCCTGGTT--AATA--TGGATTACATT---TGT--TTTATTAGCGG

ATCTTAGTGTTAAAGTTTATTTGAAGTTGGATTTAGTTGTATAAATTCTATAGTATGGAATT-TAGA-A

TGTGCTCTGAAACGTGTACACATCGCCCGTCACTCTCATTATTAG-----------------------T

GAGAGAAGTC-GTAACAAAGTAGGTGTACTGGAAAGTGTACCT

Diplopoda [NC_003343] T---ATAAA-CTTGATTTCAATTT--GTT-TTCTTCCTCT

TCTTTTTTCCTATATAATATTATT--TAGTTAATTAGTATTACTTAGTGGGGGGATTTGGATAATAGTA

TTAAACTTAACAGTAATAAGAAGTATTT-----TCAAC-----C-AAGCTTGTGCCAGCAGTTGTGGTT

ATACAAGCGAGGGAAGGA----AGGAGCGTGCGGTGGTAGTAATTTGTTTAATGTATAATGTTTCATTG

GAA---------TTAGGGTGGGTAAAATCTGCTTGGTTATTGTATACATAATATAT-TATAGTTAAAAT

GCTAATAAAATT---------A-AGATTACACCTGGATTAGATACCCAGCTATTCTAAAAGTAACATTT

-----TCACATGAGTAGTATTAGG---GTGC-TTGAACTTTAATGAATTTGGCGGTATTTTAGGCTTGG

TAGAGGAACTTGTTCTGTAA-TCGATAACCCTCGA-TAAGGGAACTTTCTTTTGCTTTC------AATT

TGTATATCGCTGTCGTCAGAGGGCTTTCTTAA--ATGGTG---CTTTCTATTTTCATAGTCTGAGGGAC

GTCAAGTCAAGGTGCAGTTCATAAGGAAGGTTGAATAAATGAGTTACAATAAATGTA-TTTATTAACGG

AAGAGGGGTGGAAAACTTTTAATAAGGTGGATTTATTTGTAAGTGTTTACTAGTATGGAGTA-CTGA-A

AAAGCTCTGAAATATGCACATATCGCCCGTCATTCTTGTCTTTAGA----------------------T

GAGACAAGTC-GTAACATAGTAGAGGTATTGGAAAATGTCTCT

Hexapoda [NC_001712] TATTCTAAAGTTTTATTCTTGCTT--ATT-TATTCACTTT

TTCTTTATATTATATATAAGTTTTGTTAGACTAAATGTTCTATTTATTTATAGTAATTAAATTTAATTA

TCAAGTTATTTTGGAATTAGTAATTGAT-----GAAGTATTGGCATATTTCGTGCCAGCAGCCGCGGTT

ATACGATTAATACAAGTG----AATATTTTTGGTTGATGTAGTTATAAATTATTTTGAGT-TTTAATAA

TTA---------ATTATTAGGTGAAATTTTATTTTATTATT--GCTCTTAATTTGA-------------

-CCTATAAAATT---------ATAAAATAGACTAGGATTAGATACCCTATTATT-TAAATGTAAATTTT

GTT--TTACCTGGGTATTATTAGTTAAGGTC-TTTAAACCCAAAGAATTTGGCGGTATTTCATTCCATT

CAGAGGAACCTATCTCATGA-TTGATAGTACACGATTTACTTTACTTAATTTATTT----------GTT

TGTATATCTCCGTTATCAGAAAATCTTTTTGG--AGAAAAAATTTTCTTGTTTTTTTATTAAAATTTAT

TTCAGGTCAAGGTGCAGCTTATAGTTAAGTGT--ATGA-TGGGTTACAATAATTTTTTTTTATTATGGA

TTTAATTTTGTAATATTTTAATGAAGGTGGATTTGATAGTAA--TTTAAATTATTTAATTTAACTGATA

TTGGCTCTGAAGTGTGTACACATCGCCCGTCACTCTCGTTATTGATTAAAATTTTATATCTTTTAATAT

GAGATAAGTC-GTAACATAGTAGATGTACTGGAAAGTGTATCT

Malacostraca [NC_002184] TTACAATAGGTTTTATTAAAACTAAAGGT-TAATAAA--T

TGTTTGAATGTAGAGGTTTCTTTAAGAAATAAATTCTCAGTACCTAATGCTA--ATCAATAAATGAACG

TTAGAATTGGTAATC-CTAATTATATAC-----CTGGT-----TAAAATTTGTGCCAGCAGCCGCGGTT

AGACTGAGAGGTAAAATG---AAAGAAATTTGGTTAAAAACAGT-TATATTTATTAATTTTTTTCTTTT

AAAGGCCTATATTAATAAAGGGTGAAATCAGTTTTTTGATA--AATAGTAAAATAA--AAGTTTTAATC

TTAATTGAAGCTGTTAAGATAAAGGGATGAACCAGGATTAGATACCCTGTTACACTTTATTTAAATTAT

AAT---TACCTGGGTACTAAACAGTTATTATCTTGAAACTCAAAGGATTTGGCGGTAATTTAGTCTATT

TAGAGGAACCTGTCCTATAA-TCGATAAACCACGAAATATCTTACTTTATTTTGTAATTATTA-CAGTT

TGTATACCGTCATTATTAGGTAACTTTAATA---AGATGTAGAGTTATTGAA-ATAGTTTAGCTAGTAT

ATTAGATCAAGGTGCAGCTTATGATAAAGGAA---GAGATGGGTTACAATATATTAA-AATATACGAAA

TAATAAAGGAATCTTTATTATTGAAGGTGGATTTAAAAGTAAAAAGATTTTAAC-AAGATCTTTTGATT

TTAGCTCTAGGTTATGTACACATCGCCCGTCGCTCTCGTCAATTTAAG--------------------C

GAGATAAGTC-GTAACATAGTAGGTGTACTGGAAAGTGTACCT

Xiphosura [NC_003057] TTTCTTTAACTGTATAAATAATATAAACA-TACTTAGATT

TCTATGACAATTTAATTGATTTTTGTTGTTTTTTTCGTAGTATTTAGTTCTG--AATAACTCATTAGGG

TGAGGTTCGGTAATTTATAAGTTAGG-------TCGGT-----TAAA-ATTGTGCCAGCTACCGCGGTT

AGACAGA-GGACCTTAGT---TAAACTTTTTGATTTTTAAAATTATGAGTT-TTTAATACTTATTATAT

TTA---------TCTTGAAAGGTAGAATTTTTATAGTTGGG--GATAATAGGTTA-----GTTTTTGTT

TTTTTGAAGCTT---------TGATTATAGACCAGGATTAGATACCCTGTTAT------TTTAAGGTGT

AAAGGAAATTAGGGTAGTAATTGTTGATCAT---GAAACCTAAAAAATTTGGCGGTGCTTTAAGCTGTT

CAGAGGAATCTGCTCTGTAA-TCGATGGTCCTCGTTTAATTTTACTTTATTTTGTTATTA----CAGTT

TGTATACCGCCGTCTTTGATTGCCTTTA-----TAGAGTTAAAGCTATCGTTTAAAATTTATTTTTTAT

GTCAGGTCAAGGTGCAGCTTATGGTAAAGGTT---GAAGTGGATTACAATTAATTTA-TTAATACGGAT

GTTTTATTGAAAGGATAGAATTGAAGGTGGATTTGAAAGTAATTTTTTATTAAATATGTAATTGTGAAT

AGGGCTCTAAGGCATGTACACATCGCCCGTCGCTCTCGCTTTT--AGG--------------------T

GAGATAAGTC-GTAACATAGTAGATGTATTGGAAAATGTATCT

[16s rRNA nchar=1313]

Annelida GCCTATGTTTATCTTATAAATAAAAACTAATAAAAACACT

TAAA----CTGATAATTTCATAATAAATCTTTACAATAGTACTATAGAGGAAGTAGTCAACAT--AATA

AAGTAGTGGTTTATACACGTACCTTGTGCATCATGGTTTTACAAGCCTCAAAT--TAATAATATTA-CC

CGAATTCTAAGCGAGCTGTCCC---TTCATAGCTAAGAGCCCACCACTAGTTGTAGCATCAACTTTGGA

AAATGGGGGGATAGGGGCTAC---ATACCAATCGCGCTAGAAAAT--CTCTGGTTT---TCAGTAAAAT

TTACCAATAAAACATGTAGCGTCC---ACCTACACTGCAAGACTACAG----AGGATAAGCCCTGTATT

CAAA--AACTAGATATGCCCTCCTTCCAGTATAGGCCTAAAAACAGCCACTAATAGTACCTCACCGTAA

ACACCATTAAATTAATTCTATACCCTGTTCAAATA--AACTGAAA--------------TTTTTGACAA

ACCTTAAATCTT-----------AAAATATT---ATGTAAAAATAAGTATTAATTTTATAACCTAAGTT

ACAGCTACCATGTATGTATTATATATTTACAACT--TATAAAGGAACTTGGCAAATTCTTATT-TCGAC

TGTTTAACAAAAACATTGCTCTCAGTAACCTTAATTAAGAGTAACTCCTGCCCAGTGAGTAATTC---A

ACGGCCGCGGTATCCTAACCGTGCAAA-GGTAGCATAATCACTTGCCCATTAATTGTGGGCTAGAATGA

A-GGATAAACGAAATAAATACTGTCTC----TATAAGCCGCTTAAAAATACCCTCTAACCGAAGAGTGT

TAGATAGCGTCGAAGGACAAGAAGACCCTATAGAGCTTAAT----------TTAAATAAATATGAAAAA

ATTTACTAAAATTC----------------GGTTGGGGCGACCAGGG-------AATTA-----CCCAT

CATCCCTAAACAAAAGATAAATGTATCAAAACACTGACCCTTCTACAAG------ATCATTAAAACAAG

CTACCTTAGGGATAACAGGCTAATCTCACTAGAGAGTCCTTATCAATAGTGAGGATTGGCCCCTCGATG

TTGGCTTAGGGA-ATCTCTATGACGCAAAAGTCATATAAAGATGGTTTGTTCAACCAATAACACCCTAC

ATGAGCTGAGTTCAGACCG-CGTAAGCCAGGTTAGTTTCTATCCTCGATCACTTTATCTAT--TTATAG

TACGAAAGGACCTAATT------AGAGTAAT

Arachnida GATAAAA--TTTTATTTAAATGTATGT--TTAAAAAAGTT

TTT------TTATAA------AAAACTGTAAGGGAAAAA--TGAAAATTTTAAAAAT---TTA--A-AA

ATGAAAAAGTTCATTAGGGTACCTTTTGCATTAGGGTTTTTAGAAGAAATTAAAGCATTTTAATTT-CC

CGAAATTAAAATGAGCTATTAAAATATTTTAATTAT-GTGGAAATATAATAAAAAATATATTAATAGAA

ATGAAATTTTATTCATATTTAATGATATCTGGTTAT-----AAT--TTTTTGATTTTAGATCATAATTA

TATTTGAAAAGTTTT------TAAATAATTGTATAATTTTATCTACGG----GGGATAAGCTTGGTAGA

TT----TTCTTTATA-ATTTTATAAT--ATTTA--ATTAAGGATTAAA-ATTTTCTAAGTC---TTTTT

AAAAAGAATTAAAAAATAATTAAAAAATTTAATTA--AGAT---------------TTTTTTATGATTA

AATTAATTATTGTTT----------AATAAA---ATTATTAAAAAATTAGTAAATTGAAAAAAATAATA

AGAAAT--TTAAAAAAAATTTAAAAATGGAAATTTAATTATAGCAATTCGGCAAATTGATTTAATTGAC

TGTTTACCAAAAACATTTCATTTTGTTG-TGTAATAAAATGTATAATCTGCTCAATGATTTTTT---AA

ATTGCTGTGGTATTTTGACTATACGAA-GGTATTGAAAT----AAGATTTTAAATGAGTGCTAAGA-GA

ATGATTGAACAATTA-TAGGCTTTCTTT-AGTTA-A-ATAATTAAATTTAATTTTTTAGTGCAAAAGCA

AAAATTAAATTTAGGGACAAGAAGACCCTATGAATTTTAAT----------TTAATTTATAATTTGAAA

TTTTAAATTAAATTTGATT---------------GGGGCGATGGAAA-------AAGAA-------TGA

GTATCTTTTTT-AGTTTTAAAAATTGGT----------TCCGTTTTTAA----CGATTAAATGAGAAAA

ATACTCTAGGGATAACAGCGTAATAATTTTGGATAGTTCTTATAGATAAAATAGTTTGCGACCTCGATG

TTGGATTAGGAT-TCTTTCTTGGCGAAGAAGTTAAGAAAAAGAAGTTTGTTCAACTTTTAAATTCCTAC

ATGATCTGAGTTCAGACCGGCGTGAGCCAGGTTGGTTTCTATC--TTAATTTAAAAGATATTTTTATAG

TACGAAAGGAATTAAAA---ATTAAAATAAT

Branchiopoda TTTGTCC-AAATTGTGTAAGTACGAGTTAAAGAAATTATC

AGCC-ATCCCTATAGATTAC-AGTACTGTGAAGGAATGTTGAAAAACTATGTCAAAC---TTA---AAA

AAGAAGATTTATTTTATCGTACCTTGTGTATCAGGGTTCTGCAAATTTCTTTT--TACATAAATTATTC

CCGAAGTTAAGCGAGCTATATTTCAAGGTTTATAAATGTAGCAAAATTTTTTTGAATTGAAATATGG-G

GTGAAATGCCATTCGAGCTTT--TTTATCTGGTTTTCTGGGAAACGAATTTAATTCGATT-TATCTGAG

TTTTTATTTTAGTATTTAATTTAAAAATTTGGGCGGTTAAAGTCTTGG---GGGGATGAGCTCTCGAGG

CAAATTTAATTGATATAATAATTAACTTGGTTTTAGATGATTTTAGGC-TTAAAAGTGGCTTAAAATAA

TAAGTTTTTTGTAATTTACATCTCAGTAGTCAGTATTTTTTAGTGTTTATCTATCTACCAGAATACTTA

AACTAACTTTTGATTT-AAGGTAAAGATGCTTAAATTAGTAGAATTTAATGTTGATT-TTTTATTAGCA

GGGTAAG--TTAAAATTTAAAGTAAATTT-AAGTATTTTAAAGGAACTCGGCAAATTGTTTTC--CGCA

TGTTTATCAAAAACATCTCCCCCTGTT---TTTATAGGGGGTATCGCCTGCTCAATGCATTAGT---AA

ATAGCCGCAGTATTCTGACTGTGCTAA-GGTAGCATAATCATTAGTCTCTTAATTAGAGGCTGGTATGA

ATGGTGAGACGAGAAAAAAGCTGTCTCT--AAAATA-TTTGTTGAATTTCATTTTTAAGTGAAAAAGCT

TAAATGCGTTTGGGGGACGATCAGACCCTTTGGAGCTTTATTTCA------TTAAAGTTTTAGGTTACT

TTTTATAACAAAAATTATGA--TGAAATTTTGTTGGGGCGACAGAAA----GTTAAAAA------GTAC

CACTTTCTTTA-AAAAACATGTATAGATGGAAAATTGATCCCTAAGGAG----GGATTAGAAGACTAAG

TTACCCTAGGGATAACAGCGTAATCTTTTTGGAGAGTTCTTATCGATAAAAAGGTTTGCGACCTCGATG

TTGGATTAAGAA-ATTAGCAAGGTGCAGAAGTTT-TGTTGGAAAGTCTGTTCGACTTTTGATTTCTTAC

ATGATCTGAGTTCAGACCGGCGTAAGCCAGGTTGGTTTCTATCCTCAAATTTTATGGCCTAT-TTTTAG

TACGAAAGGATTAAGAT----AGGGGGAAGC

Chilopoda TTTAAGTTCTGGAATTTTTGTT-TAAAGGAAAAATTGTTT

ATTA---GGTAATATTT----AATGATATTTAATTAATAATAACCGAG--AGGGATTTAATGAGTTGTA

AGGAAGATGGAGGTT---TTACCTTTTGTATTAGGGAATAACAAAATATTTAT-TGGATGTTAAAATCT

CGAGT-GCTAATGAGCTATTTTTTATGAATA-TTAACGTTTTAATGTTTTTGGGCAATTTAAAATAGAG

GTGATATGCTTTTCGTATTAGCGGATATCTAGTTATCTGATTA-TCATTTTAATTG-GCA---TTTTTA

GGT-TGGGAGTTTTCTTTTATTTA---AATGATGATTTTAT----TAG-----GGCTAAGCTT-----G

ATA----AAT--AAG-GAT-ATTTTT--AATTGGAAGATTTTATAGGC-TTGGAAGTGGCC---ATTAA

AAAGTGTGTTATAACATGTAGATTA----GGATTTTTATGTATAT--------------TCTTTTATTA

GGATAATAGAGA-----------ATAATAAATTCTTTA-CAAATAATGTTATTATTAGTAAAATTAATT

TTTTAATTGTGGGATTTTATTAAAGACT--AAAA-----TAAGGAATTCAGCAAATATTATCT-TCAAC

TGTTTATCAAAAACATTGTTCTTTGGGT-TTATATGAAGAATAAGGTCTGCCCAATGA-TTATTT-TAA

TGG-CCGCAGTATCTTGACTGTGCAAA-GGTAGCATAATCAATTGTCTTTTAATTGGAGTCTGGTATGA

ATGATTTAATGGGGA-TGCACTGTCTT--ATTT-TAGATGGTTGAATTTTTAAGGTAGGTGAAGATACT

TATATGATAATAAAAGACGAGAAGACCCTATTAAGTTTTACGTTA------TAC---TATTATTTAACG

GA--ACTATATTAT--TTTTATTACGT-TTAGTTGGGGCAATTGTGG-------AATAA-----GGAAA

ACTTCTTGTAATGAAAATATTTATTTTTATA-TTGAAATATGATCCAAGGATTTGATTATTAGAAAAAA

TTACTTTAGGGATAACAGCGTAATGTTTTCTTAGAGTTCTTATCGATGAAAAAGTTTGCGACCTCGATG

TTGGATTAAGAT-ACCTTTTTAGTGCAGCAGCTA-ATTAAGGTAGTCTGTTCGACTATAAAATTCTTAC

ATGATCTGAGTTCAGACCGGCGTGAGCCAGGTCGGTTTCTATCTTT-ATTAGGATTAAATAGATTTTAG

TACGAAAGGATTAAATC---TATCAAAGGAT

Diplopoda GTTATAATATATAATGAAAGTTATTTAGCGTGAGTAGGTT

AGTT---TGAAATAT------GGTAGTAGTAAAG-AGTACTG--TAAA--GGGGGTTTAATTA--TAAA

AAAGATTTTATTATTAAATTACCTTTTGTATTAGGGATATTTAAAATAAAAGT-TTAGATAAGCTATCC

CGAATTGCTTGTGGGCTAACTAAGATTTGTA-TTATTGTTGCATAAATATGAATAATTTTTAGTTAGGG

ATGAAATATTAGTCAAACGGCGGGATATCTGGTTTTCTTATAAGTAAATTGAATTT-ATAGAGTAATTA

ATTCTTAAAGTATTGTTAGGATTAGCTAATAATGGGTCAATATTATGG-----GGGTAAGTTCTCTTAG

GTA----GATTTAAT-AATGATTATT--GATTAAATTTTGTTATTA-T-TTAGGTGGGAAA---GTTAA

TTATTAAAATATTATTTGAGGAGTA--TGAGAATATGAGATAAAG--------------TAAGTTAT--

---TTACAGA-A-----------ATATTGAATATATTAGTAGTTTATGGTGTGTTTAGTTTAATGGGCA

TGAGAA----GAGAGTTAATGAAAAATT--AGGTGTTGTTAAGGAACTCGGCA--TAGTAATC-TTGCC

TGTTTAATAAAAACATGGTTCTTCGGGC-TTTAATGGAGAATCTGGCCTGCCCACTGAATTATAT-TAA

AGGGCTGCAGTATTTTGACTGTACAAA-GGTAGCATAATCATTAGTCTTTTAATTGAAGACTGGAATGA

ATGGTTTGACAGGGT-TACACTGTCTC--AATAATAGAAAGTT-AATTTTACATCCTTGTGAAAAGGCA

AGGATAATTTATAGGGACGAGAAGACCCTATAAAACTTGATTTTAA-----TAAATATATTACTTAGAA

GATTAATTTAATAT--ATTCGTTAAGGGTTTGCTGGGGCGGTATTTA-------TTTTA-----CATAA

ATTTGATGAAATATTGATGATTAGCTTAGTAATTGATCCGGTATTTTGG---CCGATAATAAGAAGAAG

TTACTTTAGGGATAACAGCGTAATGATTTCTGAGAGTTCTTATTGACGAAATTGTTTGCGACCTCGATG

TTGGATTAAGGA-TTCTTTTTGGCGCAGTTGTTA-ATAAAGATAGTCTGTTCGACTATTAAATCCTTAC

ATGATCTGAGTTTAAACCGGTGTGAGCCAGGTTGGTTTTTATCTTTTATTAATGAAACAGAAGTGGTAG

TACGAAAGGACCCCATTGTTTCTCAAATGGT

Hexapoda TTTAATTATTTTTGTCTTAGTATATTTTATTGAAATAATT

TTT--TTAATTATATTTTCATAGTAATGTTAATGAAT----TAATAATTATTAATTTAAATTA-TA-AT

AAGTAGGAATTATTTTCTTTACCTTTTGTATCAGGGTTTATCAAAATTTTAAT-TTGTATAAATTAATC

TCAATTTAGGTTGATCTATAAATAAATGATATTTATTGTTTCATAAATATTATTAATTTATTTATAGAA

ATGAAATGTTATTCGTTTCCTAATATATTTAGTTTCTTAAGAAA-AAATTTAATTTTTTAAAATTAATG

CTTTTATTTAATTTTTTAGTATAAAGTATTAATTTATTAATTTTTTAG----GGGATAAGC-TCTAAAA

ATTA-ATAACCTATA-ATTTATTAATTGAAATA--TTTAATAATAAGC-TTAGTACCAGCT---ATTTT

TTGATTACGTTATAGTTCATTATTT--TTTTGTTT--AGAT------------------TTTATAATTA

TTTTAGGTTGTTTAT--TAAG--ATGATGAATTTAATTTTAAAGTTTTTGTAATAATGATGGAATTAGT

ATAATTATTTTGTTTTATTTTATTTTATAGAATTTATTATAAGGAACTAGGCAATATAAATTT-CCGCC

TGTTTATCAAAAACATGTCTTCTTGAT--AATATTTTGAAGTCTAACCTGCTCACTGATTAATT--TAA

AGGGTCGCGGTATTATGACTGTGCAAATGGTACCATAATCATTAGTTTCTTAATTGGGGACTGGAATGA

ATGGTTGGACGAGAAATTTACTGTCTCTTAATAATA-TTTTTAGAATTTAACTTTTAAGTTAAAAGGCT

TAAATATTTCTTGGG-ACGAGAAGACCCTATAGAGCTTTACATTTATTAAATTAATTTTTATTATATAG

TTTAATTTTAATGTTAATT--TTTATGTTTTGTTGGGGTGACATGAA------GAATAA------TTAA

ACTCTTCATTA-TAAATCATTAATTTATGTTTATTTGATCCATAATTTG----TGATTATAAGATTAAG

TTACCTTAGGGATAACAGCGTAATCATTTTTTAGAGTTCTTATCGGTAAAATGGATTGCGACCTCGATG

TTGGATTAAGATTAATTATTGGGTGTAGTAGCT--CAATAATTAGTCTGTTCGACCTTTAAATTCTTAC

ATGATCTGAGTTCAGACCGGCGTGAGCCAGGTCGGTTTCTATC-CTAAGAATAAGTATTATTATATTAG

TACCAAAGGACCATATA---ATAAAAATATT

Malacostraca TTTGAAATGTATTTTTTTAGTAGAGTGAATCGAAATATTT

TATAATAAATTATAGACTAA-AGTACTGTAAAGGAAAGATGAAATAATTTGAAAAATGTATTAATA-AA

AAGTAAAGTTAAATTCTTGTACCTTGTGTATTAGGGAAAATCAAAATAATCTTATTATTTAAAGAAATC

CCGAAAGAAAAAGAGCTATTATAAATATATAGTTTTCGTATTAATGAAATTATCAAATTTATACTAGTA

GTGAAATGCTAATCGTTTTTT--CATATCTGGTTATTGGTGAATTAAATTTAATTTGATTATATTGAGG

TAATCAAAAGCTTTAATATAATAAAGAATAGGAGGGAAAAGCTTCTTGTTCTAACATAGGTGTGTTATG

AT---ATAATGAATA-ATTATTTTATTGAATTAGGCTTAAAAACAGCT-ATATTAATAAAA---CGTTC

TAGTTAATATAATTTTTCTTTATTA--TTTTAATA--AAATGAATCTAACTTGTAGTAGCCAATATTTA

TGTTAAGTAAAATACCATAAGTTATAATGATTTTATTAGTAGAAATACATTTGTGTAAATAGA-TAACA

TTAAATAATCTATATATTTTTATTTTTTTTAGGTATAATTAAGGAACTCGGCAAATACTACTT-TTGCC

TGTTTATCAAAAACATGTCTATATGAT--TGTTATATAAAGTCTAGCCTGCCCACTGAATTATTTTTAA

AGGGCCGCGGTATACTGACCGTGCGAA-GGTAGCATAATCATTAGTCTTTTAATTGAAGGCTTGTATGA

ATGGTTGGACAAAAAGTAATCTGTCTC--AGTTATA-ATAGTTGAACTTAACTTTTAAGTGAAAAGGCT

TAAATACTTTAAGGGGACGATAAGACCCTATAAAACTTAACAATAATTTGATTAAATTATAAATTGTTA

GTATAACTTGATTTTAATTAATGTTTGTTGCGTTGGGGCGACGGGAATATAATTAGTAACTGTTCTTAA

ATATTTTATTA-ACAAGTAT-AATTGAAGAATAATTGATCCTTTATTAA----AGATTAAAAGATTAAG

TTACTTTAGGGATAACAGCGTAATCTTCTTTGAGAGTCCTCATCGACAAGAAGGTTTGCGACCTCGATG

TTGAATTAAGGT-ATCCTTATAATGCAGCAGTTA-CAAAGGAAGGTCTGTTCGACCTTTAAATCCTTAC

ATGATTTGAGTTCAGACCGGCGTGAGCCAGGTCGGTTTCTATCTCTTAATTTTATTATAATTACTTTAG

TACGAAAGGATTAAGTA---GTTAAAATAAT

Xiphosura TTT------TATTAGTTGAGTAAGTTGTATTGAATGATTT

TGGA--TGATTATATTTTATTAGTACTGTGAAGGAAGGATGAAATATGGTGAAATATTTATTAGGATAT

TAGAAAAGATTAAATCTTGTACCTTTTGTATCAGGGGTGAATAATTGAAATTATTTATTT--ATTTTTC

CCGAAGGAAAGAGAGTTAATATGAAATTGAAATTGATGTAGTAAAATCAAGTTTTATTTTGTGTTGGAG

GTGAAATGTCAAGCGATCTTTTTGATATCTGGTTCTTTGAGAAATGAATTTAGTTCAGCTTTTGAAAAT

AAAAGTTATTTTTTTTTATTTTTTTATTTTCAGGAAGTGAGTATCTAG----GGGATAATC-TCTAGAT

AT------ATTTATA-AGGTTTGTAG-GAAAGA---TTAGTTGTAGAT-TTAGAAATGATC---ATTTT

GTGTAATAGTAGATTTATTTTTTTTTATTTTATTTTTAGGTTTAG-TATCAAGGATGTATTGATAATTG

--TTAACAAATTTTT--------AAAATGTTTGTATTAGTAGAAGTGAGGAGAGTTAGAATTGTTATTA

AGGGTTGTAGTAAAAAAGACTGTAGGTT--AATTTTTTTTAAGGAACTCGGCAAATATTTTTT-TCGCC

TGTTTATCAAAAACATGGTTTTTTGTT---TTTATGAAAAATCGGACCTGCCCAATGAGGAGAT--TTA

ATGGCCGCGGTATATTGACCGTGCGAA-GGTAGCATAATCATTTGCTTTTTAATTGAGGGCTAGTATGA

ATGGTTGGACGTAAAAAAATCTGTCTT--GGAAATA-GATTTTGAATTTTATTTTTTAGTGAAAAAGCT

GAAATTTTACTAAGGGACGAGAAGACCCTATTAAGCTTTACTTTT------TTGGTTTTTTTTAT-TAA

TTTTCGGTTGGGAAAGGCTA-AGAGAGTTTTACTGGGGCGGTAGAGA-------AAGAA----ACTTAT

CTTTTTTTTTATAATAATACTTATTTGTGAATTTTTGACCCACTTTTAG----TGGTAATAGGAGTAAG

TTACTGTAGGGATAACAGCGTAATTTTTTCGGAGAGTTCTTATCGGCGAAGAAGTTTGCGACCTCGATG

TTGAATTAAAGA-GTCAGTAGGGCGGAGAAGTTC-TATATGAAGGTCTGTTCGACCTTTAAATCTTTAC

GTGATTTGAGTTCAGACCGGCGTGAGCCAGGTCGGTTTCTATCTTTAGTTATTAGGGAGGATGTTTTAG

TACGAAAGGACCAAACA---TTATAAATTTT

[ATPase 6 nchar=495]

Annelida ATGATTTTA---------ACCTCTTTCATATTAA---TGA

TAATCGCCACAACTTTTACCCTATATCTAGCTTCCACCCCTATTGTCTTAGGTGTAAATATTCTCATAA

TAGCCCTACTCTTAGCCTCCACATTTGCGTCCTTTATAAGCTCCTGATTTGCATTTTTAATTTTTCTAA

TCTACATCGGCGGCATGTTAGTCATATTTGCCTACTTTCTAGCTTTA---ACCCCCAA----CCAACAA

ATTTCAAACTTCAATATTATACCAT--ATGCTCTAATCACATTATTAACATTTTCGGCACTAACATACA

CCACCAACATTAAAATCCCCACTTTTTCTGATATTAGTCAAGGAAACTCAATTTTGTATATATCCAGAA

CTGCACCATTCCTCATCCTTCTCGCCCTAATCCTCCTCCTTACGATAGTTATTGTAGTA-----AAATT

AACCAGACGGTCAAGGGGCCCTCTCCGCCCATTCTCCCCAT

Arachnida AATAATTTATC---TTTAAAATTTCAAAAATTTATTCCTA

TTTACATTTCTATTTTTTTTTCAATTTTAATATTTAATTGTTTAGGATTAATTCCTTATGTTTTTACTC

CCTCAAGGCACATTATCTTGTCAATAATTATAGCATTTCCTTTTTGAATAACTTTAATATTAAAAGGA-

--TGAATTACATCTTTTAATAAAATAATAACTCATTTAGTCCCTTTAGGATCACCAATAATACTTACAT

TTTTTATAGTTATTATTGAGACTATCAGAAACTTAATTCGTCCTATTACTCTTTCCATTCGTTTATCTG

CTAATATAATTAGAGGCCAT-TTATTAATTCATCTTCTTACTTCTATTCCACTTT---CCTATCCTTTT

AG--AATACTTATTATTTTACCTATTATATTATTTTTAATAATTTTAGAAACAGCTGTTGCTATAATTC

AAAGATATGTTTTCATTACTCTTTCATCCCTTTATACAAAT

Branchiopoda ACTCTAGTAGGAGTGGGGGGGGCTCAGGGGCACACACTCA

TTTTTATCTCACTATTTTTATTTATTTTATTTAATAATTTTTTTGGGTTGGCACCGTACGTATTCACAG

CATCCAGCCACTTAGCTATGACCCTGGCCCTAGCTTTCCCACTTTGACTAGCATTTATTCTTTACGGG-

--TGACTTAGTCACACTACTCATATGCTCGCCCATTTAGTTCCTTTAGGGACCCCCCCAGTTTTGATAC

CCTTTATGGTTCTTATCGAAACCGTGAGTAACGTTATCCGCCCTGGGACCTTAGCTGTACGTTTAGCAG

CTAATATGATTGCTGGCCAC-TTACTTCTAGTACTGCTAGGTAATCAAGGGCCCT--CGTTGTCCTCTT

CTCTTTTAAGAATTCTTCTGGTTACCCAGATTTTACTTTTAACGCTAGAAAGCGCGGTAGCTATCATCC

AGTCTTACGTATTTGCTGTTCTGGCGACTCTTTACTCTAGA

Chilopoda CTACTATCA---------AACACTAAGGGCCTTAATGCCC

TTACAATTCCCCTCATTCTACTAATTATATTTAACAATTCCTTAGGATTAGTTCCTTATGTATTTACAA

GAACAAGCCATATAGCTATAACCCTAACTCTCGCACTACCCCTATGACTTTCCTTCATACTATTTGGA-

--TGAATTAATAATATAAACCATATATTTACTCATTTAGTTCCCCAAGGTACCCCCGGCCCATTAATAA

TATTTATAGTTTTAATTGAAACTGTTAGTAATGTTATTCGGCCGGGAACACTTGCTATCCGCCTAGCTG

CTAACATAATCGCAGGACAC-TTGTTACTAACCCTCTTAGGAAACCAGGGGCCCT--CAATATCTTTAG

TAATATTAAGAGGGTTAGTATTTGCCCAAATTCTTCTACTATTATTAGAATCAGCAGTAGCATTAATTC

AGTCATATGTATTTGTAGTACTAAGAGTTCTTTATTCTTCT

Diplopoda ACACTACTAGGCCCCTCTTACTTCACTAGCTCCCCCTTAA

TCCTTATTACCTTATTCCTATTTATTTTAACTAACAATATCTTAGGCCTAGTTCCCTATATCTTTACTG

CATCAAGCCATCTATCCTTCACTCTCTCCCTTGCCGTCCCTCTATGGTTAACAGCCATCCTCTATGGC-

--TGACTACAGAACACTATCCATTCACTAGCCCACTTAGTTCCACAAGGAACTCCTAATGCCCTAATAA

TATTTATGGTTTGCATCGAGACCACAAGTAACTTTATTCGACCCATTACTCTTTCAGTTCGACTTGCAG

CCAACATAATTGCAGGCCAC-CTTCTAATAACTCTACTAAGTAATGCTCTAGCTA-ATATTAACTTTAT

AGCTTACGCCACCTTAGTCC-CAACACAACTTGCACTAATCACACTAGAATCAGCAGTAGCTATTATTC

AAGCCTACGTATTTACAGTCCTAACAACCCTATATATTAGA

Hexapoda ACATTATTAGGAAAAAACTCATTTCAAGGATCAACACTAA

TTCTAATTTCAATTTTTATCATAATATTATTTAACAATTTTATAGGATTATTCCCATACATTTTTACAA

GAACTAGTCATATAACATTAACATTCTCAATTGCATTACCAATATGAATAAGATTTATATTATTTGGA-

--TGAATTAATAATACTAATCATATATTTACACATCTTGTCCCACAAGGAACACCAAATGCACTTATAT

CATTTATGGTTCTAATTGAAACAATTAGAAATGTTATTCGGCCAGGGACCCTAGCTGTACGATTAGCTG

CAAATATGATTGCAGGACAT-CTTTTATTAACATTATTAGGAAATACAGGACCGT--CACTAACAACAA

GAATTATATTATTTCTAATTATTGGACAAATATTACTTTTAATTCTTGAATCAGCCGTAGCTATAATTC

AAGCATACGTATTCTCAATTCTAAGAACATTATATTCAAGA

Malacostraca ATTTTATTAGG---GTCATCACATACGGGTTCAACTCTTA

TATTTGTAAGACTTTTTACTTTTATTGTATTTAATAATTTTTTAGGTTTACTGCCTTACGTATTTACTA

GAACAAGACACCTAATCATAACCCTCGCTCTTGCATTACCTTTATGGTTAGCTTTCATAATATTTGGG-

--TGGATTAATCATACACAACATATATTTGCTCACCTTGTACCACAAGGAACGCCAGATGCCCTTATAC

CTTTTATAGTTTTAATCGAAACTATTAGAAATGTTATCCGACCAGGGACCTTAGCTGTTCGATTAGCAG

CCAATATAATTGCAGGTCAT-TTATTACTTACTCTCTTAGGAAATACTGGTCCAT--CCTTATCAACTA

CCTTAGTTTTTTTGCTTATTATAACACAAATTTTACTGTTAATTTTAGAAGCTGCTGTAGCAGTAATTC

AATCATATGTTTTTGCCGTTTTAAGAACTCTTTATGCCAGT

Xiphosura ATTCTACTATCAAATTCAAAAAAACCTGGAATAACTTTCC

TCCTAATCTCCCTATTTTGACTAATCTCAATAAATAACTCCTTAGGCCTTCTACCACATATCTTCACAT

CTACAAGACATATTATAATAACTCTCTCATTAGCCCTTCCAATCTGAATAACAATTATACTATTCGGA-

--TGATTAAATAACACTACCCATATATTTGCCCATTTAGTTCCCCAAGGAACCCCACCAGCCCTAATAA

TATTCATAGTCTGCATTGAATCTATTAGTAATCTTATTCGACCAATCACATTATCAGTTCGCTTAGCTG

CAAATATAATTGCTGGTCAC-CTCCTGCTTACCCTTCTCAGAAATAGAGCAGTCATGTCTAGACTTTCT

A--CTACACTAACAATTTCTATTGCCCAAATTGCCCTCCTTACTTTAGAAATAGCTGTAGCACTAATTC

AAGCCTACGTATTCGTAGTTTTATCAACACTTTACTCCACA

[ATPase8 nchar=164]

Annelida ATGCCTCACCTATCTCCCATAAGATGAATTACTTCTATAT

TAATATTCTGAATTTCCGTAT--CAATTCTTTTTTCCACCCTATGATGATCCAAC-AATTATTT-ATTC

AGTTCAAAAATAACTAATTGCGCCCCCAAATCC-CTTACACCTTGAAATTGATTA

Arachnida ATTCCTCAACTTTTTCCAATAAATTGAATTTGTCTATCTA

TTTTATTTTCTTTATTACTTAGCTTTTCTCTAATTAACTTATATTTTTTTTTAATAAAAACAAAAAAAT

TATTACCAAATTTTATTA--AAATTAATAAA-----TTTTTATTGAA-ATGATAA

Branchiopoda GTGCCCCAAATCTGACCTATAAATTGAGTTATTCTTTTTT

GGATTTTCGCTTTGACTTTTG--TGATATTTATGACCTTCCTTTATTTCACAAACTTTTCTCCCAAAAT

TAGACTAGAGAAGTCCCATCAAACTACCCTGAGCCACCTAGACTGAAAATGATAG

Chilopoda ATACCTCAAATATCCCCTCTACCTTGAATAATCCTAATAT

TAATTTTCATCATTTCCCTAA--TAATCTTTGCCTCACAAATACATCACAACAAAATATTTTCATCCCC

AGAAATTTCTACGTCTCT--AG-ATAAAAAAAGTC-AAT--CTTGAATATGATAA

Diplopoda ATTCCTCAAATATTCCCGACCCAATGAATCACCTTAACCC

TCTTTTTTACTAGCATAGTAT--TAATCTTATT-----CGTAAAAATTAACTACT-TTTTCTCTCAACC

AACTCCCCCAGCTTCCCCTACTTCCCCAATTACACTTGCTGCCTGACTATGATAA

Hexapoda ATCCCTCAAATATCACCAATAATATGATTTTCACTATTCA

TTATATTCTCAATAACAATAA--TATTATTTAATCAATTAAACTTCTTCTCTTATAAACCAAATAAAAT

TATAAG-AAGTAATAATA--AAATTAAAAAAAAAAACATTAATTGAATATGATAA

Malacostraca ATTCCACAAATAGCCCCTTTATTATGATTAAATCTTTTTC

TTATATTTTCAGCTACATTTG--TTATATTTATTGTACTAAATTATTTCATTAAAGTACCATCTAAAAT

TGAGAAATCTTCATCTCA--ATTACAAAAAATAGA-AATAACTTGAAAATGATAA

Xiphosura ATTCCTCAAATAGCCCCTCTTAATTGAGCCATAATAACAA

TCATATTTTCTCTCTCCCTTT--TAGTTTCAATAATTATCCTTTACT---CAAA--TTTCAACTCAACT

CCTCCAACAAAAATAAAAATAAAAACCTCCCAAAAAT-TAATTTGAAAATGATAA

[COX I nchar=1534]

Annelida ATGCGATGATTCTACTCAACTAATCACAAAGATATTGGAA

CTTTATACTTCATTCTTGGGGTATGGGCTGGCATGGTGGGAGCCGGAATAAGACTTCTTATCCGTATTG

AGCTAAGACAACCTGGTGCATTCCTAGGAAGTGACCAATTATACAATACAATCGTTACTGCGCACNNNT

TTGTTATAATTTTCTTCCTAGTGATACCAGTCTTCATTGGCGGGTTTGGGAACTGACTTCTTCCCCTAA

TACTGGGCGCTCCTGATATAGCATTCCCACGCCTTAATAACATAAGATTTTGACTTCTACCCCCCTCTC

TTATTCTCCTAGTTTCCTCAGCTGCCGTAGAGAAGGGAGCCGGAACAGGCTGAACAGTGTACCCCCCTC

TTGCCAGAAATCTCGCCCATGCTGGGCCATCTGTAGATTTAGCTATTTTTTCCCTTCATTTAGCAGGTG

CGTCATCTATTCTAGGGGCTATTAATTTTATTACCACTGTAATCAACATACGCTGAAGTGGGTTACGAC

TAGAACGAATCCCTCTGTTTGTCTGAGCTGTATTAATTACAGTAGTTCTCCTCCTCCTATCCCTTCCTG

TACTTGCCGGAGCAATCACAATACTCCTAACAGATCGAAATCTTAATACCTCATTTTTCGACCCCGCTG

GTGGAGGGGATCCAATTTTATATCAACACCTTTTCTGATTCTTTGGTCACCCAGAAGTATATATTCTTA

TTCTTCCTGGGTTTGGGGCCATTTCCCACATTGTTAGACACTATACAGCTAAACTTGAGCCATTTGGAG

CCTTAGGGATAATTTATGCAATACTAGGAATCGCAGTTTTAGGATTTATTGTCTGAGCACACCACATAT

TTACCGTTGGCTTAGATGTGGACACCCGGGCATATTTCACAGCAGTAACCATAATTATCGCAGTACCGA

CAGGTATTAAAGTATTTAGTTGATTAGCTACCATTCACGGGTCAAAGATCAAATATGAAACACCAGTGT

TATGGGCCTTAGGATTTATCTTTTTATTTACAACGGGAGGTTTAACTGGAATTATTTTATCTAACTCCT

CCCTAGATATTATTCTTCATGACACATACTATGTAGTAGCACACTTCCACTACGTGTTGAGAATGGGCG

CCGTATTTGCAATCTTTGCTGCCTTTACTCATTGATTCCCCCTACTAACAGGGCTTACCCTACACCACC

GATGAGCCAATGCACAATTCTTCCTCATATTCTTAGGGGTAAACACTACATTCTTTCCCCAACACTTCC

TAGGATTGAGCGGTATACCTCGGCGATATTCTGACTACCCTGATGCTTTTATAAAATGAAACGTCGTGT

CATCATTTGGGTCTCTCCTGTCCTTTGTAGCATTAATACTGTTTATTTTTATTTTATGGGAAGCCTTCG

CCTCACAGCGAAGAGTAATCTCAAGGCCCCACATATCATCAGCTCTTGAATGGTCTGACCCTATTCTAC

CTCTAGATTTTCATAATTTAAGGGAGACCGGAATCATTACATACC

Arachnida CCGCGATGACTTTTCTCCACAAATCATAAAGACATTGGAA

CTATATATTTAATTTTCGGAAGATGATCAACTATAGTGGGGATATCAATAAGAATTTTAATCCGAACTG

AATTAGGCCAACCCGGATCTTTAATTGGGAATGACCAAATTTACAATGTTATTGTAACAGCCCATGCTT

TTATTATAATTTTTTTTATAGTTATACCTGTAATAATTGGGGGATTTGGTAACTGATTGATTCCTTTAA

TATTAGGAGCACCTGATATAGCTTTCCCTCGAATAAATAATCTAAGTTTTTGACTATTACCCCCTTCTT

TATTTTTATTAATCAATTCTTCCTTAGTAGAAAGAGGAGCAGGGACAGGATGAACTGTTTATCCTCCTC

TATCATCTAACATCTCCCATTCAGGTGCATCAGTCGATATAGCAATTTTTTCTCTTCATTTAGCAGGCA

TTTCTTCAATCTTAGGAGCAATCAATTTTATTACAACAATTATTAACATACGTTCCCCTGGAATATCAA

TAGAACGAATACCTTTATTTGTTTGATCAGTTTTTATTACAGCGATTTTACTTCTTCTTTCCCTTCCTG

TTCTTGCTGGAGCAATTACTATATTACTAACAGATCGAAATTTTAACACTTCATTTTTCGACCCTTCAG

GAGGAGGTGATCCTATTTTATATCAACATTTATTTTGATTTTTTGGGCATCCTGAAGTTTATATTCTTA

TTCTTCCTGGATTTGGAATAGTTTCCCATATTATTTGTTTTCACACAGGAAAAAAAGAACCTTTCGGAA

CATTAGGAATAATTTACGCTATATTAGCAATTGGTTTTTTAGGATTTATTGTTTGAGCCCATCATATAT

TTACTGTTGGTATAGATATCGACACTCGAGCTTATTTTACAGCAGCAACTATAATTATTGCTGTTCCAA

CAGGAATCAAAATTTTTAGTTGACTCGCTACTCTTCATGGGTCTAATATTAATTATAACTCTTCTATAC

TTTGAGTACTAGGATTTATTTTCTTATTCACTATTGGAGGCTTAACTGGAATTATTTTAGCTAATTCTT

CAATTGATATTATTTTACATGATACCTATTATGTGGTAGCTCATTTTCATTATGTTCTTTCCATAGGAG

CTGTATTTGCAATTATAGGATCAATTACACATTGATTTCCTTTATTTTTTGGTTTAAATTTTAATTCTC

TTTGGTTAAAAATTCAATTTTTTTCTATATTTATTGGGGTAAATATAACCTTTTTCCCTCAACATTTTT

TAGGATTAAGAGGGATACCTCGACGATACTCTGATTACCCAGATTTTTTTTCCAAATGAAACTTAATTT

CTTCGTTAGGAAGAATAATTTCTTCTGTAAGAGTAATTTTTTTTGTTATTATTATATGAGATGCTATAA

CATCAAAGAAAATTATTATTGTTTCTCAATTTTCTAACTCTGCTAATGAATGACAATTAAATTTTCCAC

CTTCAGAA---CACACCTTTAATCAAAATAACATTCTTATTAAAT

Branchiopoda CGACGTTGACTCTTCTCAACTAATCATAAGGACATTGGCA

CTCTCTATTTTATCTTTGGTATTTGATCAGGGATAGTAGGCACTGCTCTTAGACTTTTAATTCGCGCCG

AACTGGGGCAATCAGGAAGTTTAATCGGAGACGATCAGATTTATAATGTAATTGTTACCGCCCACGCGT

TCGTAATAATTTTTTTTATAGTTATGCCCATCATAATTGGGGGGTTCGGGAACTGATTAGTCCCCCTTA

TACTAGGGGCCCCGGATATGGCCTTCCCTCGACTTAATAATTTAAGATTCTGATTTCTTCCTCCGGCAC

TTACACTACTTTTAGTTGGGGGGGCAGTAGAAAGTGGGGCTGGGACAGGGTGAACCGTGTACCCCCCAC

TCTCGGCTGGGATTGCTCATGCGGGGGCCTCTGTAGATCTAAGAATCTTCTCCCTCCATTTGGCGGGTA

TTTCTTCTATTCTTGGGGCTGTCAACTTTATTACTACTATTATCAATATACGATCGGCTGGGATATCAT

TAGACCGAATTCCTTTATTTGTGTGAGCAGTGGGCATTACTGCGTTACTTCTACTATTGAGCCTACCAG

TCCTAGCAGGGGCAATTACTATGCTTCTTACTGATCGTAACCTCAATACCTCCTTTTTTGACCCTGCAG

GAGGGGGAGATCCGATCTTATACCAGCATTTGTTTTGGTTCTTTGGTCATCCTGAAGTATACATTTTAA

TTTTACCCGGGTTTGGTATAATTTCTCATATTATTAGCCACGAAAGAGGTAAAAAGGAAGCATTCGGCA

CGCTTGGGATAATTTACGCTATACTAGCTATCGGGGTGTTAGGCTTCGTAGTATGGGCCCACCATATAT

TTACTGTGGGCATGGATGTTGACACACGAGCGTATTTTACTGCAGCTACAATGATTATTGCGGTTCCTA

CAGGAATTAAGATCTTCAGATGACTTGGCACACTTCACGGAACCCAGCTTGTATTTACCCCTTCTCTCT

TGTGAGCGGCAGGGTTTGTGTTTCTGTTTACAGTAGGGGGGCTTACTGGGGTAGTTTTAGCCAACTCAA

GAATTGACATTATTCTTCATGACACGTACTATGTCGTAGCTCATTTTCACTACGTTTTATCTATAGGGG

CAGTATTCGCTATCTTTGCAGGAGTAGCCCATTGATTCCCTCTTTTTACCGGGTTAACCTTGCAAGCCC

GTTGGTTAAAGATTCACTTCTTTACAATATTCGTAGGAGTAAATTTGACCTTTTTTCCGCAACATTTCT

TAGGATTAGCAGGTATACCCCGGCGTTACTCAGACTACCCTGATGCCTATATGACTTGAAACGTTATCT

CATCTGTAGGGTCCGTAATCTCGTTTGTGGCTACCCTGGGGTTTATTTTTATTATCTGGGAGTCTTTTG

TAAGACTGCGACCGACTTTGTTCTCAACACACTTATCAACTTCAATCGAATGACAGCATTCTTTTCCCC

CCGCTGAG---CATAGTTATAACGAACTAGTATTTATTTCCCAAT

Chilopoda CTGCGATGAATATTTTCTACAAATCATAAAGACATCGGAA

CTATATACTTTGTCCTAGGAATTTGGTCAGCAATAATTGGTACAGGTCTTAGTCTTCTTATTCGACTAG

AACTAAGCCAGCCCGGAAGTTTAATTGGGGATGACCAGATCTATAACGTTATTGTTACCGCTCATGCTT

TTATTATAATCTTTTTTATAGTTATACCAATCATAATTGGAGGATTTGGAAACTGACTTGTTCCATTAA

TATTAGGCGCACCAGACATGGCTTTCCCACGAATAAATAACATAAGATTTTGACTCCTCCCCCCTTCAT

TAACCCTTCTACTTTGTTCAGCAGCAGTAGAAAGAGGTGCAGGAACAGGCTGAACCGTCTATCCCCCTC

TATCTTCTAATATCTCTCATAGAGGAGCGTCAGTAGATATAACGATCTTTTCGTTACACCTCGCTGGTG

CGTCCTCAATTTTAGGGGCTATTAATTTTATTTCAACAATCATTAATATACGAACAAGAGGAATATCAT

TTGAGCGAGTGCCCTTATTTGTATGGTCAGTAAAAATTACAGTTATTTTACTCCTACTATCTCTCCCAG

TTTTAGCCGGAGCAATTACAATATTGTTAACTGATCGAAACTTAAATACTAGATTCTTCGACCCTACAG

GAGGAGGTGACCCAATCTTATATCAACATTTATTCTGATTCTTTGGGCATCCCGAAGTCTACATTTTAA

TTTTACCTGGATTCGGAATAATCTCCCATATTGTGAGTCAGCAAGCAGGAAAAAAGGAGCCATTCGGAA

CCCTTGGAATAATTTATGCTATATCTGCTATTGGTATCCTAGGATTTGTAGTATGAGCACATCATATAT

TTACTGTAGGAATAGACGTAGATACCCGTGCCTACTTTACAGCAGCTACTATAGTAATTGCCATCCCAA

CAGGAATTAAGATTTTTAGCTGACTTGCCACCTTACATGGTGCACAATTAGTTTATACTGCCCCATTAA

TATGATCCCTAGGGTTCATCTTTCTTTTTACGGTAGGGGGACTTACAGGTATTATTCTAAGAAATTCAT

CAATTGACATTGTCTTACACGATACGTATTACGTAGTTGCCCATTTTCACTACGTCCTCTCTATAGGAG

CAGTATTTGCAATTATAGCAGGAATTATTAATTGATTTCCCCTATTTTTAGGGATCTCGATAAATCATA

CATGACTAAAAATCCAATTCTTTATTATGTTCTTAGGAGTAAACCTTACATTTTTCCCCCAACATTTTC

TTGGTCTTGGAGGAATACCTCGACGATATAGTGATTACCCAGACTCTTATACAACATGAAACATTGTAT

CTTCAATAGGCTCACTAATTTCCTTCTTTGGCATCCTAGCCATAATCTTTATTATATGAGAGGCACTAA

GTGCACAGCGCCCCCTTATTACTCTGATAAATATACAATCATCATCAGAATGACAACATAACACTCCCC

CAAGAGAC---CACACTTACAATCAACTCTCCTTATTAAGAAACT

Diplopoda ACGCGATGACTCTTCTCCACTAACCACAAAGACATTGGAA

CAATGTACTTAATCTTTGGCGCATGAGCCGCTATAGTAGGAACTGCCTTAAGAATACTAATTCGTCTAG

AACTAGGCCAACCAGGTAGACTCATTGGAGATGACCAAATCTACAACGTAATTGTTACTGCACACGCTT

TCGTCATAATCTTCTTCATAGTAATACCAATTATAATTGGCGGATTCGGAAACTGACTAGTCCCTCTCA

TACTAGGAGCCCCAGATATAGCTTTTCCCCGCCTAAATAACATAAGCTTCTGGCTTCTTCCCCCAGCAT

TCTTTCTCTTAATTGCATCTTCTGCAGTTGAAAAAGGGGCAGGCACAGGTTGGACTGTATATCCCCCTC

TAGCCTCCAACTTAGCCCATGCAGGCCCATCAGTTGATATAGCCATTTTTTCTCTCCATCTTGCAGGTG

CATCCTCTATCCTAGGCGCCATCAATTTTATTACCACAATCATCAATATACGGTCCCAAGGAATATTAT

TAGAGCAAATACCCTTATTCGTATGATCAGTAAAACTCACTGCCATTCTACTTCTTCTTTCCCTTCCCG

TTCTAGCAGGAGCTATTACTATACTACTAACCGACCGAAACTTTAATACATCCTTCTTTGACCCTGCCG

GCGGGGGAGACCCTATCTTATATCAACACTTATTTTGATTTTTTGGGCACCCTGAAGTTTATATTCTAA

TTCTCCCTGGGTTCGGAATAATCTCTCACATTATTGTTCAACAAAGAGGAAAAAAAGAAGCATTTGGAG

CCCTCGGAATAATCTACGCAATAGTAGCAATTGGCCTCCTAGGGTTTATTGTATGGGCACATCACATAT

TTACAGTAGGAATAGACGTTGACACACGAGCCTACTTTACAGCAGCCACTATAATCATTGCCGTCCCCA

CAGGAATTAAAATTTTCAGCTGATTAGCCACCATTCACGGAACCCCTCTATCCTATGACACCCCTATAT

TATGGGCCCTCGGTTTCGTATTTTTATTTACAGTAGGCGGCTTAACTGGTGTAGTTCTAGCAAACTCCT

CTATTGATATTATACTTCACGATACCTATTATGTAGTAGCTCACTTTCATTATGTCCTCTCTATAGGAG

CCGTCTTTGCCATCCTAGGGGGAATAACATTTTGATTCCCGCTAATAATAGGAGTAACATTAAACCCTA

AATGAAGAAAAATTCATTTTATTATTATATTCTTTGGAGTCAACTTAACCTTCTTTCCTCAACATTTCC

TTGGACTCAGAGGGATACCCCGCCGATACTCTGACTACCCTGACGCTTACACTACATGAAATGTTGTAT

CTTCAACAGGTTCCATTATATCTTTCCTAGGTGTAATAATATTCCTCTTTATCATATGAGAAGCCCTTA

TTAGCCAACGTCCCGTCCTATTTTCAACTTCAAAAAGCCATTCAATTGAATGACACCACGGCTTTCCAC

CTCAAGAC---CACACATATAATCAAATAATCTCCCTAATCAAAT

Hexapoda CAAAAATGATTATTCTCAACAAACCACAAGGACATTGGTA

CACTGTATTTTATATTCGGGGCATGAGCTGGAATAGTAGGAACATCAATAAGAATAATTATTCGAGCTG

AATTAGGTCAACCAGGAACAATAATTAACGATGATCAACTATATAATGTAATCATTACAGCACACGCAT

TTGTTATAATTTTCTTCATGGTTATGCCAATTATAATTGGAGGATTCGGAAATTGATTAGTACCATTAA

TAATTGGAGCTCCAGATATAGCTTTTCCACGAATAAATAACATAAGATTTTGATTATTACCACCATCAT

TAACACTCCTACTAATGTCTTCTGTAGTAGATAATGGAGCTGGTACAGGATGAACAGTATATCCTCCAC

TAGCCAGAGTCATTGCTCATAGAGGAGCTTCTGTAGATTTAGCAATTTTTTCATTACATCTAGCAGGTG

TTTCCTCAATTTTAGGAGCTATTAATTTCATTACAACAGCAATCAATATACGATCAAATAATATAACCC

TTGATCAAACACCATTATTTGTTTGATCAGTAGCAATTACAGCCTTATTACTTTTATTATCATTACCAG

TATTAGCTGGAGCAATTACTATATTATTAACTGATCGAAACCTTAATACGTCATTCTTCGACCCGGCAG

GAGGAGGTGACCCAATTTTATATCAACACTTATTTTGATTCTTTGGTCACCCAGAAGTTTATATTTTAA

TTTTACCAGGATTTGGTATTATTTCACATATCGTTTGTCAAGAAAGAGGAAAAATTGAATCATTTGGAA

CAATTGGTATAATTTATGCAATATTATCAATTGGATTAATAGGATTTATTGTATGAGCTCATCACATAT

TTACAGTAGGAATAGACGTAGATACACGAGCTTATTTCACCTCAGCAACAATAATTATTGCTGTACCAA

CAGGAATTAAGGTATTCAGATGAATAGCAACATTATACGGAACTAAATTCAAATTCAATCCACCATTAT

TATGAGCATTAGGATTTATTTTCCTATTTACAATAGGAGGTTTAACTGGTCTTGTACTTGCAAATTCAT

CTCTAGATATTGTTTTACATGACACATATTATGTAGTAGCACATTTCCACTATGTATTATCTATAGGAG

CAGTATTTGCAATTATAGGAGGAATTATTCAATGATACCCTTTATTTACAGGATTAACTATAAATAGTA

AATGACTAAAAATTCAATTTACTATTATATTTATTGGAGTAAACTTAACATTCTTTCCTCAACACTTTC

TAGGATTAGCAGGAATACCACGACGATATTCTGATTATCCTGACGCTTATACATCATGAAATGTTATCT

CCAGAATTGGATCAACAATTTCAATCACAGGAATTATTATATTCATTTTAATTATATGAGAAAGAATAA

TTAAGCAACGAAATGTATTTATTTGAACAAATATAAGAAGATCAACAGAATGATTACAAAATAATCCAC

CAGCAGAA---CACAGATACTCAGAACTACCACTAATTA---ATT

Malacostraca CAACGATGATTATTTTCTACAAATCATAAAGACATCGGAA

CTCTATATTTTATTTTCGGAGCTTGAGCTGGAATAGTAGGTACAGCCCTTAGTCTTATTATTCGTGCTG

AATTAGGTCAACCAGGAAGCCTTATTGGAGATGACCAAATTTACAATGTAGTAGTTACAGCTCACGCTT

TCGTTATAATTTTCTTTATAGTTATGCCTATTATAATTGGAGGTTTCGGGAATTGGCTTGTCCCTTTAA

TGTTAGGTGCTCCAGATATGGCATTTCCCCGAATAAATAATATAAGTTTCTGACTTTTACCCCCTTCGC

TAACTTTACTTTTATCTAGAGGTATAGTCGAAAGAGGAGTGGGAACTGGATGAACAGTATACCCTCCTT

TATCAGCCAGAATTGCTCACGCAGGTGCTTCAGTTGATCTAGGTATTTTTTCATTACATTTAGCAGGGG

TCTCATCAATCTTAGGAGCTGTAAACTTTATAACGACCGTTATCAATATACGATCTACAGGGATAACTA

TAGACCGAATACCACTTTTTGTTTGAGCAGTATTTATTACAGCTCTACTCCTACTGTTATCTTTACCAG

TCCTAGCAGGAGCTATTACTATACTATTAACAGATCGTAATTTAAATACATCCTTCTTTGATCCAGCAG

GAGGTGGTGACCCAGTCTTATATCAACATTTATTTTGATTTTTCGGTCATCCTGAAGTATATATTTTAA

TTCTTCCTGCCTTTGGGATAATCTCACATATTATTAGTCAAGAATCTGGTAAAAAAGAAGCTTTTGGAA

CATTAGGAATAATCTATGCTATACTAGCCATTGGTGTTCTAGGATTTGTAGTATGAGCTCATCATATAT

TTACTGTAGGTATAGACGTTGATACTCGTGCTTACTTTACATCTGCTACGATAATTATTGCTGTCCCGA

CGGGTATTAAGATCTTCAGCTGACTAGGAACATTACACGGTACTCAATTGAATTATAGTCCTTCTTTAA

TTTGGGCATTAGGGTTTGTATTTTTATTTACAGTTGGGGGTCTAACAGGAGTTGTCCTTGCTAATTCAT

CTATTGATATTATCTTGCACGATACTTATTATGTAGTAGCCCACTTCCACTATGTTCTTTCAATAGGAG

CCGTATTTGGTATTTTTGCAGGTATTGCCCACTGATTTCCTCTTTTTACCGGTTTAACCCTGAACCCAA

AATGATTAAAAATCCACTTTCTAGTTATATTTATTGGGGTAAACATTACATTTTTCCCTCAACATTTTT

TAGGGCTTAATGGTATACCTCGACGCTATTCAGATTATCCAGACGCCTACACAGCATGAAATGTTATAT

CATCTATTGGATCTACAGTATCATTAATTGCAGTACTAGGTTTTGTTATAATTGTATGAGAAGCCTTAA

CTGTAGCTCGGCCAGTTATATTTTCTTTATTTTTACCTACTTCGATTGAATGACAACATAATCTCCCAC

CCGCAGAT---CATAGTTATATAGAAATTCCTTTAATTACTAATT

Xiphosura CCGCGATGACTTTATTCAACAAATCACAAAGACATTGGAA

CAATATATCTAATTTTTGGAATTTGAGCCGCAATAGTAGGGACAGCTCTCAGAATCTTAATTCGAGCCG

AACTTGGCCAACCTGGCTCATTAATTGGAGATGATCAAATTTACAACGTAATTGTTACAGCCCACGCAT

TCGTAATAATTTTTTTTATAGTTATACCTGTAATAATCGGAGGATTTGGAAACTGACTTATTCCTCTAA

TATTAGGGGCCCCTGATATAGCTTTTCCCCGACTCAATAACATAAGCTTTTGACTTCTCCCCCCATCTT

TTCTTCTATTACTCAGATCAGCTGCAGTAGAAAGAGGAGCAGGAACAGGTTGAACCGTATACCCTCCTC

TAGCATCAGGTATAGCTCACGCAGGAGCCTCAGTAGACTTGACAATCTTTTCTCTCCACTTAGCAGGAG

TATCATCAATTTTAGGTGCAATTAATTTCATTACCACAATTATTAATATACGAACATCCGGAATAGTAC

TTGAACGAATACCATTATTCGTTTGATCAGTTAAAATTACTGCAATCCTTCTTCTTCTATCTCTCCCTG

TTCTTGCTGGAGCTATTACAATACTCCTAACAGATCGAAACTTCAATACATCATTTTTTGACCCTGCAG

GAGGGGGTGACCCAGTCCTATACCAACATTTATTTTGATTTTTTGGGCACCCTGAAGTCTACATTTTAA

TTCTTCCTGGGTTTGGAATAATCTCTCATATTATTAGCCACCAAACAGGAAAAAAGGAACCTTTCGGGA

CTCTTGGAATAATTTATGCCATATTAGCTATTGGCATTCTTGGTTTTATAGTATGAGCTCACCATATAT

TTACAGTGGGAATAGACGTAGACACACGAGCATACTTCACAGCAGCTACAATAATCATTGCTGTTCCCA

CAGGAATTAAAATCTTTAGATGACTAGCTACCCTACATGGATCACAACTCTCATACGACCCACCTCTTC

TATGAGCCCTAGGGTTTGTTTTCTTATTTACAATCGGAGGATTAACTGGAGTAATCCTAGCTAACTCCT

CCATTGATATTATCCTCCATGACACATACTACGTCGTAGCCCACTTTCACTATGTCCTCTCAATAGGAG

CAGTATTTGCAATCTTAGCAGGGGTCACTCATTGATTTCCATTATTCTTTGGAATAGCAATAAACCCAA

AATGACTAAAAATTCACTTTTTAGTTATATTTATTGGAGTAAACGTCACTTTCTTCCCTCAACATTTCC

TAGGTTTAAGCGGAATACCCCGACGATATTCAGACTACCCAGATGCTTTCACTACCTGAAATGTTTTAT

CATCCTTAGGCTCTCTCCTCTCTTTTATTGCCGTCATAGGATTCATCTTCATTATATGAGAATCCATCA

TTAGAAAACGCCCTATTATTTTTTCTAACCATCTTCCCTCCTCAGTAGAATGACAACACAATATTCCAC

CAGCAGAC---CATACATATAATCAATTAACAATATTAATCAAAT

[COX II nchar=679]

Annelida ATGCCAAACTGAGGTCAAGTAATATTTCAAGACGCCGCATC

ATCTGTCATGCTCCAACTAGTATCCTTTCACGACCATGCTTTATTAGTCCTAACTCTAGTCCTAACAGT

GGTCGGCTATGCTCTCCTAGCACTCATATTAAACAAACAAGTAAACCGTTACATTATAGAAGCTCAAAC

AGTAGAAACAATCTGAACTATTTTACCAGCTCTTATTCTCCTAGTTCTAGCCCTACCATCTTTACGCAT

TCTTTATATTACAGACGAGGTGAGACAACCATCTATTACTGTGAAGACTATTGGGCATCAATGATATTG

AAGATACGAATATACTGATTTCTTAAATGTAGAAATAGATTCATATATGCTACCAACCTCAGACCTACT

ACCGGGGGACTATCGACTCCTAGAAGTAGATAATCGTATGGTAGTACCTATACAATTAGAAATTCGAAT

ACTAATCACTGCTGCAGATGTGATTCACTCATGAACAGTTCCAGCTCTCGGGGTAAAAGTGGATGCCGT

GCCTGGACGTCTAAACCAAATTGGATTTACAACTACACAACCAGGGGTATTTTATGGTCAGTGCTCAGA

AATCTGCGGTGCTAATCACTCATTTATGCCAATTGCAGTGGAAGCTATTAACACTAAATCCTTCATAAG

ATGAGTCTC-CAATTTT

Arachnida ATGATAACTTGATCTAATATTATGTTTTCTAACAGAAACTC

CCCTATTATAGAACAAATAATTTTTTTTCATGATCATTCCATATTAATTATTATTATAATTACCATTAT

TACATTATACATAATTGCAAATATTATAACAAACTCATTTTCATCTCGATTTCTAATAGAAGGACAAGA

AATTGAAACCATTTGAACAATTATTCCAGCAATCACATTAATTTTTATTGCTATACCCTCATTACGTCT

TCTTTATATACTCGATGAATCTTTCTCTCCTTCTATTACTGTTAAAATTATCGGGCATCAATGATATTG

ATCATATGAATTTTCAGATTTTAACATT---GAATTTGACTCTTTCATAATCCCCTCCCATGAAATAAA

AAATAATTCATTTCGTTTACTAGACGTTGATAATCGAATAGTACTTCCTTTTAATTCCCACATTAAATT

CTTAATTTCGTCAGCAGACGTAATTCACTCTTGAACAGTTCCATCTTTAGGAATAAAAATAGATGCTGT

TCCTGGGCGTCTCAACCAATCCTTTTCCTTTGCTAATCGACCTGGATTATTTTTTGGACAATGTTCTGA

GATTTGCGGAGCAAATCATAGATTTATACCAATCTCTCTTGAAATTACATCCTCAAATAATTTTATTAA

ATGATTAAAATTATTCT

Branchiopoda ATGGCAACATGAGCACAAATTGGATTCCAAAATAGAGCATC

CCCTCTAATAGAACAACTTATCTTTTTCCACGACCACGCCCTTCTTATTCTTATTTTGATTACCACTCT

AGTAGGATATTTTATACTTAGTTTAGTCACCAACAAATTTGTCAACCGTTACTTGCTTGACGGACAGAT

AATCGAAATTATCTGGACTGTTCTTCCTGCTGTTATTTTAATCATCCTAGCCCTGCCCTCATTACGGCT

CCTCTACCTCATTGATGAGACCACAGAACCCAGAATCACCTTAAAGACTGTAGGCCATCAATGATACTG

AAGTTATGAATATTCTGATTTCAAGGATATCGAATTTGATTCTTACATGATGCCATCGAACGACCTAGA

AAAAGGGCAATTCCGCCTTCTTGAAGTAGACAACCGAGTGATTTTACCATACCTCACCCAGGTACGTCT

ACTAGTCACAGCAGGAGACGTAATCCACTCCTGAACAATCCCCAGTTTAGGAATCAAAGCTGACGCCGT

ACCTGGTCGTTTAAATCAACTTAACGTATTTTTTAATCGACCAGGTGTCTTTTATGGTCAATGCTCCGA

AATTTGTGGGGCCAATCATAGTTTTATACCCATCACTGTAGAGGCGGTTAACCCCGCGGACTTCCTAAG

TTGAGTTAAATCATTCT

Chilopoda ATGGCAACATGATCTTCCTTATCCTTCCAAGACAGCTCTTC

TCCACTAATAGAACACCTTACTTTCTTTCATGATCACACTATAATTATTATTTTATTAATTACTATATT

AGTTGGATATATAATAGCCTCCCTTCTCATAACAAATCTTCCTAATCGGCTACTTACAGAACAACAATC

AATTGAAACAATCTGAACTCTTGTTCCGGCTATTACCTTAATTTTTATTGCCCTCCCTTCTCTTCGGCT

ACTATACCTACTAGATGAGGCAAGAAACCCAAGAATAACCTTAAAAACAATTGGACATCAATGATATTG

GTCCTATGAATACTCTGACTTCAAAGACGTGGAATTTGACGCATACATAATTCCTACACAAGAATTAGA

AATAAAGCATTTTCGACTATTGGACGTAGATAATCGAACAACTCTTCCATTTATAACACAGATTCGATG

TCTAATCTCAGCCGCCGATGTCCTTCACTCCTGAACAGTTCCCTCATTAGGGGTAAAAGCAGACGCCGT

CCCGGGACGATTAAATCAAGTATCTTTCCTAATTAAGCGCCCTGGGATCATATATGGACAATGTTCAGA

GATTTGTGGAGCAAACCATAGTTTTATACCTATTGTTATCGAGAGAGTAAACACAAAAACATTTTCTAA

GTGAATTATAAACTTTC

Diplopoda ATGGCAGCCCCACATACACTCCTTTTTCAGAATAGTGCCTC

CCCCTTAATAGAACAGCTAATTATATTTCATGACCACGCCCTCTTAATTTTAATCCTCATCATTTCCCT

AGTCTCCTACATATTTATCATACTTATATTTAACCAACTAACCAACACTCAACTTTTAGAAGGACAAGA

AATTGAGACTATCTGAACAATCTTCCCAGCCATTATCCTAATCTTCATTGCACTCCCATCTCTTCGTTT

ACTTTACTTATTAGATGAAATCAAAACCCCCTCATTAACAGTAAAAACCATAGGACACCAATGATATTG

GTCCTATGAATATTCAGATTTCACCGATCTAGAATTTGATTCCTACATAGTCTCAGACCCAGACAT---

---TAACCAATTCCGTCTCTTAGAGGTCGATAATCGAACTGTGGTCCCCACCAACTCCCAAATTCGAGT

CTTAATTAGAGCCCTTGACGTAATTCACTCATGAGCCATTCCAGCCCTAGGCGTAAAAGCGGATGCTGT

CCCAGGACGCCTAAATCAAGTATCTTTCTCCATCTCACAACCAGGAATCTGATTTGGTCAATGCTCAGA

GATCTGCGGAGCAAATCACAGCTTCATACCCATTGTAATTGAAGCTGTCCCTCCCACACAATTTATCTC

ATGAGTGATAACATCAA

Hexapoda ATGGCAACATGATCAAACTTATCATTACAAGATGGAGCTTC

ACCATTAATAGAACAATTATCATTCTTTCATGATCATACAATAATTGATCTATTATTAATCACAATAAT

TGTAGGATATTCGCTTAGATATATATTATTAACAAAATATACAAACCGAAATATACTTCATGGTCATTT

AATTGAAACTATCTGAACAGCACTACCAGCAATTACATTAATCTTTATTGCATTACCATCATTACGATT

ACTATATTTACTTGATGATTCATCAGATGCTATAATTACAATTAAAACAATTGGACGACAATGATACTG

AAGTTATGAATATTCAGATTTCATTAATGTAGAATTTGATACATATATAACTCCTGAAAATGAATTAAA

TACAGATGAATTCCGACTCTTAGAAGTTGATAATCGAACAACATTACCTATAAATACAGAAGTACGAGT

ATTAACTAGAGCATCTGATGTACTCCACTCATGAGCAGTACCAGCTTTAGTATTAAAAATTGACGCAAC

ACCCGGACGACTAAACCAAGGTATATTTATAATTAACCGCCCAGGTCTATTTTTCGGTCAATGCTCAGA

AATCTGTGGAGCTAATCATAGATTTATACCAATTGTAATTGAAAGAACATCAATTAAACTTTTCATTAA

ATGATTATCTAACATAA

Malacostraca ATGCCAACATGAGGTCACTTAGGTTTACAAGATAGAGCTTC

TCCTCTTATAGAACAATTAATTTTTTTCCATGATCACGCTATAGTAGTATTAATTTTAATTACAACATT

AGTTGGATATATAATATCAACTTTATTTTTTAATAATTTTACAAATCGCTTCTTATTGGAAGGACAAAC

TATTGAAATTGTATGGACAGTACTTCCCGCTCTAATTTTAATTTTTATTGCACTTCCTTCTTTACGATT

ACTATATCTATTAGATGAAGTTAATAATCCAAGTGTTACCTTGAAAACTATTGGACACCAATGATACTG

AAGTTACGAGTACTCAGACTTTTTACAAATTGAATTTGACTCTTATATAATTCCATCAAATGAATTATC

AGAAGACGGATTTCGACTTTTAGATGTGGATAATCGAACTGTTCTACCTATGAATACTCAAATTCGAGT

ATTAATTAGAGCTGCTGATGTTATTCATTCATGAACAGTACCTGCCCTTGGTGTAAAAGCAGATGCAAT

TCCAGGGCGACTTAATCAAGTAAGTTTTTTAATAAATCGACCAGGATTATTTTATGGTCAATGTTCAGA

AATTTGTGGGGCAAATCATAGATTTATGCCTATTGTTGTTGAAAGTGTATCAGTTAAATCATTTTTAAA

CTGAATTTCCTCAGCTA

Xiphosura ATGGCAACTTGATCCCACCTCCTATTTCAAGACAGAGCTTC

CCCTACTATAGAACAAATAATTTTCTTTCATGATCACACAATAATTATCTTAACCTTAATTACAACTCT

AGTTGTATACATAATAATAAATACTATATACAATTCCTTTACTAATCGAGTTCTTTTAGAAGGTCAAGA

AATTGAAACGTTCTGAACCATCATCCCAGCACTCATATTAATCTTTATTGCCTTACCCTCACTCCGACT

TTTATACCTTATAGACGAAATTAATAATCCTGCTCTAACAGTAAAAACCATTGGTCACCAATGATATTG

GTCATATGAATACTCAGACTTCTCCTCCATCGAATTTGATTCCTATATAATCCCTAGAAGAGAAAACCT

CCCCTCCTCATTCCGATTATTAGATGTTGACAACCGCACAATCCTTCCAATAAACACCCAAATTCGAAT

AATAATTACTGCTGGTGACGTTATCCACGCTTGAACAGTTCCAGCTCTAGGTATAAAAATTGATGCAAT

CCCAGGCCGTTTAAACCAGTCCTCAATTATAATTAACCGCCCTGGCCTATTCTTCGGACAATGCTCAGA

AATTTGTGGAGCAAATCACAGCTTCATACCAATTGTTGTTGAAAGTGTAAACACTTCGTCCTTCATCAA

ATGAATAAATTCAATAG

[COXIII nchar=781]

Annelida GATTCG--TCAACCCTTCCACCTCGTTGAGTACAGCCCATG

GCCTCTAACCTCA-TCTATTGGAGCTTTTACCCTAGCTATCGGATTAGCTAGGTGGTTTCATAACCATG

GATTCTTATGCCTAACCCTAGCCGCTTTTCTTATCATCGTTTCCATAATTCAGTGATGGCGAGATGTCG

TGCGAGAGGGC-ACATACATGGGTCATCATACCAGCTTAGTAACTACCGGCTTACGTTGGGGTATAATT

TTATTTATTACTTCAGAAGTGATATTTTTCCTCGCCTTCTTTTGAGCCTTTTTCCACAGAAGCTTATCC

CCCACACCAGAAATTGGCTGTTCCTGACCTCCAACAGGAATCCACCCCTTAAACCCATTCAGAGTCCCC

CTGCTAAACACTGCTGTTCTTCTAGCCTCAGGGGTTACAGTAACCTGAGCTCATCACAGACTAATAAGA

GGTAAGCGTATTGATGCCACTCAAGCACTAATTCTAACTGTCTGCTTAGGTGCCTACTTCACTTTCCTC

CAAGCTGGCGAATACATAGCCGCCCCATTTTCTATTGCTGATAGGGTGTATGGCACTACATTCTTTGTG

GCAACTGGATTTCATGGGCTTCACGTTCTAATCGGGTCATCTTTCCTAGCTATTTGCTTAGCGCGTACA

TGGTCC-CACCACTTCTCTGCTGGGCATCACTTTGGATTCGAAGCCGCTGCCTGATACTGACACTTTGT

AGATGTGGTGTGAATCTGCCTATATCTATGTATTTACTGATGAGGCTCCT

Arachnida ATGATATTTCATCCATTTCACATAGTAGAAAAAAGACCTTG

ACCATTTTCTAGATGTATTACATCTATTATG-ATTACTATAAGAAGAATTATAACACTCCATTTTTCAT

TTTCTCATATATTTTCATTAGCATTAATTATTTTAATATTAACTCTTTTTCAATGATGACGTGATGTAT

CTCGAGAAGCTTGCTTTTCAAGGCCTTCATTCTCATAT-GTTTTATGAGGATTAAAATTTGGAATAATT

TTATTCATTATTTCTGAAATTTTTTTTTTTATTTCTTTTTTTTGAGCTTTTTTTCATAGAAGACTATCT

CCTAATGTAGAAATTGGAGCCATATGACCTCCTACAAATATTTATCCTTTTAATCCATTTGAAATTCCT

CTTCTTAACACAACTATCTTAATTTGCTCTGGTATTTCAATTTCTTGATCCCATCATAGAATTATTAAT

AATAATTTTAAAGAAGCTTTTTATGCATTATTTATTACCATTCTACTAGGAATCATATTTTCTATTTTA

CAAATATGAGAATACATACAAGCACAATTCTCTATGAGAGACAGAATTTTTGGTTCAACATTTTTTATA

ACAACAGGTTTTCACGGAATTCATGTAATTATTGGAACAACTTTTTTAATTATTTCTCTTTTTCGA-AT

AAATAAAAACCTAATATCATCATCCCATCATTTTGGATTTGAAGCCGCTGCTTGATATTGACATTTTGT

CGATGTAGTATGATTATTTTTATTTACTTTTATATACTGATGAGTATTCT

Branchiopoda CATATAAATCACCCCTTCCACCTCGTAGATAAAAGCCCCTG

GCCTATTTTAAGA-GCCTTCAGAGTAATAAGATTAGTTAGAGGTCTAGCTAAATGATTTCATACTTTTA

ATATAGACTTGGCAATCCTAGGCATTTTGTCTACCACCCTAGTGATAATTCAATGGTGACGAGACGTAG

TCCGCGAAGGA-ACTTTCCAAGGCCTCCATACAAGTAAGGTTGGCGTAGGGCTTCGTTGGGGAATAATC

TTGTTCATTGCCTCAGAAGTTTTATTTTTTGTCTCATTTTTTTGGGCGTTCTTTCACAGTAGCCTTGCC

CCCGCCGTTGAGCTGGGAAGAGCTTGACCCCCCCTTGGTATTAAACCCTTTAATCCATTTCAGATCCCC

CTTCTAAATACTGCTATTCTTTTAGCCTCGGGGGTCACAGTTACTTGGGCACACCACGCTTTAATGGAA

AATAACCATACTCAAGCTTTTCAAGGATTATTTTTAACAGTCTTTCTCGGCTTTTACTTTACCTCTTTA

CAAGCCCTAGAATACTTTGAGGCCCCTTTCTCTATCGCCGACGCTGTATACGGAACCACTTTTTTTGTG

GCAACAGGGTTTCACGGACTTCATGTTATCATCGGGACAACTTTCTTACTAATTTGCCTTATCCGT-CA

TACCCTTCATCATTTTTCTTTTACCCATCATTTTGGGTTTGAAGCGGCAGCATGATATTGGCACTTTGT

TGACGTTGTTTGACTATTTCTTTTTATCTCTATCTACTGGTGGGGCAACT

Chilopoda AAAACAAGCCATCCTTATCATATAGTTAACCCAAGACCATG

ACCAATC-CTAGCCGCTGTAGGAGTATTTATTACAATAACAGGAGTAACCACATGATTTCACACATCAA

TAAACTATTTAATAATCTTAGGTAATATTTCAATTATTATTATTAGCGCCCAATGATGACGAGATATTA

CCCGAGAAGCC-ACTTTTCAAGGCCTCCATACTATCCCAGCAGTATATGGCTTAAAATGAGGCATAGTA

CTATTTATTATTTCAGAAGTTTTCTTTTTTCTTTCCTTCTTCTGAGCATTCTTTCACAGAAGAATAGGC

CCCTCTCCCGAAATTGGATCAATTTGACCCCCCATAATAATTACCCCCTTAAACGCCTTTCAAGTACCC

CTACTAAATACGGCAATCCTCCTATCATCAGGAGTGTCTGTCACCTGAGCGCACCATGCCCTTATAGAA

AACAATTATTCTCAAATAAAAACAGCCCTATTAATTACCTTAATCTTAGGGGTATACTTTACCCTGCTT

CAAGCTTTTGAATACAAAGAAGCCGCCTTTTCCATTACAGACGCCACTTTTGGTTCTACATTTTTTATG

GCCACAGGATTTCACGGACTTCACGTAATTATTGGAACTACCTTCCTTGCCGTATGCTTTATGCGA-CA

TAATGTAAACCATTTTTCTTCTACTCACCATATAGGATTTGAAGCAGCAACTTGATACTGGCACTTCGT

AGACGTAGTTTGACTATTCCTATTTCTCTCTATTTACTGATGAGGAAGTT

Diplopoda ATGACCAACCACCCTTATCACTTAGTCGAAAAAAGCCCATG

ACCCTTA-ACAGCCTCACTCGGCGCATGATGCCTAACCTTAGGAAACGTATTCTGATTTCACTCATTTA

CCCCTCTGCTTGCCTTAACAGGCAGCATAATCTTAATTTTAACAATAATCCAATGATGACGAGACGTAT

CACGAGAAGGC-ACACTTCAAGGCCTACACACTATTAAAGTAGTAGTAGGCCTAAAATGAGGAATAATC

CTATTTATTGTATCCGAAATCTTCTTTTTCATCTCATTCTTCTGAGCCTTCTATCACAGAAGACTTGCC

CCCGTCCCCGAGATCGGATCCCTATGACCTCCCACTCATATCTCCCCATTTAATCCATTTCAAGTACCA

CTTCTAAATACAGCCATCCTACTAGCCTCCGGAGTCACAGTAACGTGAGCTCACCACAGACTTATAGAA

AATAATCTATCTCAAAGCAAATTAGCACTCTCCCTCACATTAGGACTAGGAATTTACTTTACTGCTCTC

CAAGCATTCGAGTACATCGAAGCCCCCTTTGCTATTAGAGATTCAATCTATGGTTCAACATTCTTCGTA

GCAACAGGCTTTCATGGACTTCACGTCCTTATCGGCTCTTCTTTTCTTCTAGTATGCCTAATTCGA-CT

AAGAACACATCACTTCTCCAGCCACCATCATTTTGGCTTTGAAGCAGCTGCCTGATACTGACATTTTGT

AGACGTAGTCTGACTATTTCTTTATGTTTCAATTTACTGATGAGGAATAT

Hexapoda AACAACAATCACCCATTTCATATAGTAGATTATAGACCATG

ACCATTAACTGGA-GCAATCGGAGCAATAATTCTAACCTCAGGAATAACTAAATGATTTCATACATTCA

ATATAAATTTATTAATAATTGGAATAACTGTCATTGTATTAACAATAATTCAATGGTGACGAGATGTAG

TTCGAGAAGGT-ACATTTCAAGGTCTACACACTAAATTAGTATCAAAAGGACTGCGATGAGGAATAATT

TTATTTATTGCATCAGAAGTTTTATTTTTCGCCTCATTCTTCTGAGCATTCTTTAATAGTAGATTAGCA

CCAACAATTGAACTAGGAATAAAATGACCTCCAATAGGAATTCAACCATTTAATCCAATCCAAATTCCA

CTACTTAATACTGCAATTTTACTAGCGTCAGGAGTTACAATTACATGAGCACATCACAGAATCATAGAA

TGTAATCATTCACAAGCATTACAAGGATTATTCTTTACAGTAATATTAGGATTTTATTTTACTTTATTA

CAAATATACGAATATTGAGAAGCACCTTTTACCATTGCAGACGCAGTATATGGATCTACATTCTTCGTA

GCAACAGGATTCCATGGGCTACATGTAATCATTGGTACAACATTCTTATTAACATGCCTAATTCGA-CA

TATAATAAACCAATTCTCATCTAATCACCACTTTGGATTTGAAGCTGCAGCATGATACTGACACTTTGT

TGATGTAGTATGATTATTTTTATATTTATCAATTTACTGATGAGGTAGAT

Malacostraca CACGGACACCACGCTTTCCATTTAGTAGATATAAGACCATG

ACCACTTACAGGT-TCAATTAGAGCTATAATATTAACCACAGGACTAGTTAAATGATTTCATCAATTTA

ACCCTGACCTTTTATTTTTAGGAATTATTGCGACAACTCTTACTATAATTCAATGATGACGAGATATTA

CGCGAGAAGGT-ACTTACCAAGGATTACATACTAAAGCAGTTACTATCGGCCTTCGATGGGGTATAATC

TTGTTTATTACTTCAGAAGTATTATTTTTTTTCTCTTTCTTTTGAGCTTTTTTCCACAGAAGATTATCT

CCTAACGTAGAAGTAGGTAGTTGTTGACCTCCTGCAGGAATTCAAACCTTTAACCCTTTTCAAATTCCT

CTCCTTAATACAGCAATCCTTCTTGCTTCAGGTGCTACTGTAACTTGAGCTCACCATGCAATCATAGAA

TCTAACCACACACAAGCTATTCAAAGATTAGCTATCACAGTATTATTAGGTATATATTTCACAGCTTTA

CAAGCATTAGAGTATTATGAAGCTCCGTTTACAATTGCAGATTCAGTATATGGTTCAACATTCTTCGTA

GCTACAGGATTTCACGGTCTACATGTTATTATTGGTAGTACATTCCTCTCAGTATGCTTATATCGTTTA

TACAAA-TGTCATTTTTCAGCCATACATCACTTTGGATTTGAAGCTGCCGCTTGATATTGACATTTTGT

AGATGTTGTATGATTATTCCTCTATATTTCTATTTATTGATGAGGAGGCT

Xiphosura AAACACACACATCCATTCCACATAGTAGACCAAAGTCCATG

ACCCTTAACTGGA-GCTCTAAGAGCTCTCACTTTAACAATAGGACTCATTAAATGATTTCATAAAATAA

ATCCTAACCTATTAATACTAGCTATATTTATTACTTTAGTAACAATAATCCAATGATGACGAGATATCA

TCCGAGAATCC-ACCTTCCAAGGAAACCACACTTCAATTGTAATATCAGGACTACGGTGAGGAATAATC

CTATTCATCGTATCAGAAATTCTATTTTTCGCTTCATTTTTCTGAGCATTTTTCCATAGAAGACTTTCC

CCAAGTATTGAACTAGGATCCTCTTGACCACCTTCAGGTATTTCACCTTTTAATCCTTTTCAAATCCCT

CTTCTTAATACCGCAATTTTACTATCATCAGGCGTAACCATTACTTGAGCCCACCACAGAATTATGGAA

AACAATCACCCTCAATCTCTTCAAGCCCTATTCCTTACTATCATCTTAGGTCTTTACTTCACTAGCCTG

CAAGCCTGAGAATACTGAGAAGCCCCATTCTCTATTGCAGACTCAGCCTACGGAACAACCTTTTTTGTA

GCCACAGGTTTTCACGGACTTCACGTAATCATTGGCACATCATTCCTTTCCATCTGCTTCATCCGC-CT

AATATTTTTTCACTTTTCCCCTAATCACCACTTTGGGTTTGAAGCTGCCGCATGATACTGACACTTTGT

TGATGTAGTTTGACTCTTCCTCTTTATCTCTATTTACTGATGGGGATCTT

[CytochromeB nchar=1085]

Annelida CCGGCAATTAAAATTATTAATAGTACCCTAATTGATCTTCC

CGCGCCTAATAATATCTCC-ATTTGATGAAACTACGGATCACTTCTGGGCCTATGCCTTGTAATCCAAG

TTTTAACAGGCCTATTTCTAAGAATACACTACGTACCCAACATTGAAATAGCTTTCTCATCAGTAGCCC

TCATTTCTCGAGACGTGAACTACGGCTGACTTCTTCGGTCTATTCACGCTAATGGAGCATCTATATTTT

TTCTATTTATCTATCTCCATGCGGGCCGAGGTCTATATTATGGCTCGTATAACCTCAGTGAAACTTGAA

ATATTGGGGTAATTTTATTTCTTCTCACCATAGCCACTGCATTCATAGGTTATGTTCTGCCCTGGGGAC

AAATGAGATTCTGGGGAGCGACAGTAATTACTAACTTATTCTCAGCAATTCCCTACATCGGGAAAACTT

TGGTAGAGTGAATTTGAGGTGGGTTTGCAGTAGATAACGCTACCCTAAACCGATTTTTCGCATTCCATT

TCATTCTCCCGTTTGCTATTATAGGGGCGACTATCCTACACATCATATTTCTTCACGAGTCAGGATCTA

ACAACCCCATTGGTCTAAATGCAGACTCCGACCGAATCCCGTTTCATCCCTATTATTCTATTAAAGACA

CCCTCGGTTATACGTTAGCAATTTCAGCTCTATCTTTAATAGTTTTATTCGAGCCTAACTTATTTACCG

ACCCTGAGAACTTTTTAATAGCAAACCCTCTTGTAACACCTATTCATATTAAACCTGAATGATATTTTC

TATGAATATATGCCATTCTACGTTCAATTCCTAATAAGCTAGGGGGGGTGATAGCACTATTCGCAGCCA

TCGTTATTCTATTTATTCCACCG--CTAACAAGTGTCATAAATAAGCGGAGCCTCTCATTTTACCCCCT

AAATAAGACAATATTCTGAGGCCTTGTAGCATCCTGAGCTATTCTTACATGAATTGGGGGTCGACCTGT

AGAAGACCCCTTTATCATCATCGGGCAAGTATTTACATCCTTGTACTTTATCTACTTTATTTCCAGTCC

TACCATCTC

Arachnida ATGAACTTAAAAAAAATTATAAACCCAATTTCCAACCTCCC

TACCCCATCAAATATTTCTTATAT-ATGAAATATAGGTTCTCTTTTAGGAATATGTTTAATAATTCAAA

TTTTAAGAGGTCTTTTTTTAGCAATGAATTTCTCCAGAGACATTACTACAGCATTTAATATAATATCTC

ATATTTCACGAGATGTTAATAACGGTTGATTAATCCGATCTATCCATTCAAATGGAGCATCAATATTTT

TTATTTTCATATATTTGCATATCGGCCGAGGAATTTATTACTCTTCATTTTTTTTTTTAAAAACTTGAA

TAACAGGAATTATTATAATTTTTATTCTAATAGCCACAGCTTTTCTAGGCTATGTTCTCCCTTGAGGTC

AAATATCTTTTTGAGGAGCAACAGTAATCACAAACTTATTTTCAGCTATTCCATATATTGGCTCTATAT

TAACTTATTGAATTTGAGGGGGATTTTCAGTTGATAATAACACCCTAACTCGATTCTTTTCTTTGCATT

TTATTCTTCCTTTTATATTATTATTAATAGTAATAATCCATATTATAATAATTCACGAAAAAGGGTCGA

GAAACCCTTTAGGATTAAATTTAAACATTGATAAAATCCCTTTTCATCCATATTTTACAGTAAAAGATA

TTTTAGGATGTTTAGTAACTTTACTTTTTTTTTCTATTATTGTTTTAATTATACCATACATTCTTAATG

ATTCAGAAAATTTTAACGTTGCTAACCCATTAGTTACTCCTCCTCATATTCAACCCGAATGATATTTTT

TATTTGCATACGCTATTCTCCGATCAATTCCTAACAAATTTGGAGGTGTAATTGCATTAGTAATATCAA

TTTTAATTATTATTACTCTTCCCTTTTCTATAAAAAATAAATTTTCCTCATTTTATT-TCTTTCCCACA

AAAAAACTTT-TATTTTGAACTATAGTAAATTTATTCTTACTTTTAACATTCTTAGGAGCTTGCCCTGT

AGAATATCCTTTTGTAATTACCAGTCAAATTTTAACTATTATATATTTTTCTTTTTTTTTAATTATTCC

TT-TATTAT

Branchiopoda CCCCTAATAAAAATTCTTAACAGAGCCGTAGTGGATCTCCC

TGCACCCTCAAATATCTCA-AGATGGTGAAATTTTGGTTCATTGTTAGGTCTCTGTTTAGTTACCCAGA

TTTTTACTGGAATTTTCCTAGCTATACATTACACCCCCCACGTTGAAATAGCATTTTCAAGTGTCATTC

ATATCATCCGAGATGTAAATTATGGCTGACTTTTACGTACGATTCATGCTAACGGAGCTTCCTTTTTTT

TCATTTGTCTGTATCTCCACGTTGGACGTGGACTATACTACGGGTCTTACTTATTCTTACTCACTTGAT

TCTCAGGGATTTTACTTCTCCTCCTAACTATGGCAGCCGCTTTCATGGGATACGTTCTTCCTTGGGGGC

AGATATCTTTCTGGGGGGCCACTGTAATTACCAATTTACTCTCTGCTATCCCTTATATAGGAGATATAA

TTGTTCAATGACTGTGGGGAGGCTTTGCTGTAGATAATGCGACCCTCAACCGGTTTTTTAGCTTTCACT

TTCTGATCCCCTTCATTATTATAGGAGTAGTTATTATTCACCTCTTGTTCCTCCACCAGACAGGGTCAA

ATAATCCTCTTGGTCTTAAGAGAGATTCTGATAAAATCCCTTTTCACCCCTACTTTACTATTAAAGATT

TAGTAGGATTCCTCTTCATATTAAGATTTTTAATTATTTTAACACTATTAGCCCCTAATTTGCTAGGAG

ACCCAGAAAACTTTAACCCAGCCAATCCTCTGGTTACCCCTGTACATATTCAACCTGAATGATATTTTT

TATTTGCCTACGCAATTCTTCGATCGATCCCTAATAAGTTGGGGGGGGTTCTAGCCCTTTTATTGTCAA

TCTTAATCCTAGCCATCATGCCAATTTGGCATAAGAGAGAAATAAAGGGA--TTAGAATTTTACCCATT

TAATAAGTTTTTATTTTGATCACTAATCGGGACTGTATTTATTTTAACCTGAATCGGAGCAAAGCCTGT

AGAAGACCCCTACGTTTTAGTGGGCCAGCTTTTTACCGCCATCTACTTTAGATACTTTATTCTAGCCCC

TCTTACTTT

Chilopoda CCCCTTATTAAAATTATTAATGGGTCATTAGTCGACCTCCC

AACCCCCCTCAGAATTTCATATTT-ATGAAATTTTGGCTCATTATTAGGCCTTTGCTTAGGTATCCAAA

TTCTTACAGGACTATTTCTAGCAATACACTATACCGGAGATACATTAATTGCATTTGACTCTATTACAC

ACATTTGTCAGGATGTAAATGACGGCTGACTAATACGAGTGATTCATGCCAACGGAGCTTCTGTATTTT

TTATTTGTTTATACATACATATTGGGCGAGGAATATACTTTGGGTCATATATACTTATATTCACTTGAT

TCTCCGGTGTTTTGCTCTTATTATTAGTTATAATAACAGCATTTGTGGGGTATGTACTACCGTGAGGCC

AAATATCATTTTGAGGGGCGACAGTAATTACAAAATTATTATCCGCTCTTCCTTATATTGGAGGGACAA

TAGTACAATGACTATGAGGAGGGTTTGCAGTAGCTAATGCAACCTTAACTCGATTTTTTGCCTTCCACT

TCATTCTCCCTTTTATTGTCGCAGCAGTGGTTATCCTTCATTTACTATTTTTACACCAAACAGGATCAA

ACAACCCCCTAGGAATAAATAAAGA---TTATAAAATCTCTTTCCACCCAATATTTTCCTCAAAAGATA

CTCTCGGCTTTCTCATTCTATTCTTCTTCTTATTGTTCATTTCATTGCTGTATCCCTACAGATTAGGAG

ATGTAGAAAATTTTATTCATTCTAACCCTCTTGTAACCCCCATTCATATTCAGCCTGAATGATATTTTT

TATTTGCCTATGCCATCTTACGTTCAATTCCCGATAAACTTGGAGGAGTATTAGCCCTCCTCATGTCTA

TCTTAATTTTATTAACACTTCCTCTCTCTA-TATCACGAAATTTTAACTCTACCTCTGCCTACCCAATT

ATAAAAATCT-TCTTCTGGCTTCTAGTATCAAATGTCTTTCTATTAACTTGAATCGGGGCCCGTCCCGT

AGAAGATCCTTACATTATAGTAGGACAAATTTTAACTGTAACATATTTCCTATTATACTTTATTTTACC

TGCCCTATC

Diplopoda CCTTTAGTAAAAATTATAAACTCTGCCCTAATTGATCTCCC

TAGCCCATCCAACATTTCTTACCT-GTGAAACATGGGTTCCCTACTAGGAATATGCTTAATAATCCAAA

TTTTAACAGGCCTATTTTTAGCTCTTCACTTCTCTGCAAACACTGACATCTCTTTCTTTACAGTAACCC

ACATTACCCACGATGTTTCATTAGGCTGACTCATCCGATCAATTCACTCCAACGGAGCCAGACTCTTCT

TCATCTGCCTCTATCTTCATATTGCTAAAGGAATCTATTACAATTCCTTTACTCTTCAATTAACCTGAA

TGTCAGGAATTACTATCCTTCTACTGGTAATAATAGCCACCTTCTTAGGCTACGTTTTACCATGAGGAC

AAATATCTTTCTGAGCAGCCACCGTTATCACAAATCTTCTCTCAACAATTCCCTATATTGGTAATATAC

TAGTTCAATGAGTGTGAGGGGGATTTGCCGTAGACAACGCCACATTAACTCGCTTCTTTACATTTCACT

TCCTAATTCCGTTCATTGTAGTATTTATAGTATTAATCCATTTTCTATTTCTCCATCAAACAGGATCTA

ATAACCCCCTAGGCATTAACAGAAGAACAGACAAAATCCCGTTCCACCCCTTCTTCTCAAGCAAAGATT

TTTACGGAATTATTCCCACCCTAACAACGCTTTTCCTCGTTAGCTGACTATATCCATCCCTACTTATTG

ACCCAGAAAACTTTATTCCAGCAAACCCACTTGTAACGCCAATTCACATCCAACCAGAGTGATATTTTC

TATTTGCATACGCAATTTTACGATCAATCCCCAACAAGCTAGGAGGACTCGTTGCTTTACTAAGCGCCA

TCCTAATCTTCTACCTATTCCCCCTAATCTCCA--CAAAAGTGCTAAAGGTAAACTCCTTTAGATTTCC

AAGCAAACTCCTATTCTGAAATTTTACTAGCGTATTTATCTTACTCACCTGAATTGGCGCCCGCCCAGT

AGAACCACCCTATATTATGGTAGGACAAATCCTAACTGCCCTGTACTTTAT---CCTTATCCTAATTCT

TCCCCTTAT

Hexapoda CCAATAATTAAAATTATTAATAATTCACTAAATGATTTACC

AGCACCAACAAACATTTCA-ATATGATGAAACCTTGGATCATTACTAGGAATATGCTTGATAATTCAAA

TTGTTACAGGTTTATTCTTAACTATACATTACACACCAAATATTGAAATAGCATTCTCAAGAGTAGTAC

ACATTTGCCGAGACGTGAATAATGGATGATTAATCCGAACATTACACGCAAATGGGGCTTCAATATTCT

TCATCTGCATATATTTACATGTAGGACGAGGAATTTATTATGGATCATACATGTATATAAATACATGAA

TAACAGGAACAATTATTTTATTCTTAGTAATAGCAACAGCATTTATAGGATACGTTTTACCATGAGGTC

AAATATCATTTTGAGGAGCAACAGTAATTACAAATTTACTATCAGCAATTCCTTATATTGGAACAGACA

TTGTTCAATGAGTTTGAGGAGGATTCGCAGTAGATAACGCAACATTAAATCGATTCTACACATTCCACT

TTGTACTACCATTTATTGTTATAGCAATGGTTATAATTCATTTATTTTTCCTTCATCAAACAGGATCTA

ACAACCCAATTGGATTAAATAGAAACATTGATAAAATTCCATTCCATCCTTACTTCACTTACAAGGATA

TAATTACATTCATCATCCTAATAATAATTCTAATCATATTATGCTTAATTGACCCTTATATATTAGGAG

ATCCCGATAATTTTGTACCAGCTAACCCCTTAGTAACACCAATTCACATTCAACCAGAATGATATTTTC

TATTTGCATACGCAATTTTACGATCTATTCCTAATAAATTAGGAGGAGTTATTGCATTAGTTATATCAA

TTAGAATTTTAATAATCATACCATTCTATAATAAAACAAAGTTCCGAGGAAATCAAT-TCTATCCAATA

AATCAAATTA-TATTCTGAATTATAGTAATCGTAATTTGTCTATTAACATGAATTGGAAAACGACCAGT

AGAAGAACCATATATCATAACAGGACAAATTTTAACAATCATCTACTTCTCATATTTCCTATTTAACGT

ACACATCGC

Malacostraca CCTTTATTTAAAATTTTAAATGGAGCTGTTATTGACCTCCC

AGCACCAGCTAACATTTCA-ACTTTGTGAAACTTTGGTTCTCTACTTGGTTTATGCTTAGTTATTCAAA

TCGTTACTGGACTCTTTTTAGCTATACACTATACTGCTCATGTTGACCTAGCATTCTCTAGTGTGGCAC

ATATTTGTCGAGATGTAAATTATGGATGACTTCTCCGAACGTTACATGCTAATGGAGCGTCTTTCTTCT

TCATTTGTCTGTATATACATACCGGACGAGGTATTTATTATGGATCGTTTTTATATATACATGCTTGAT

CAGTAGGTGTCATTATTCTTCTACTAGTTATAGCGACTGCCTTCTTAGGATATGTGTTACCTTGAGGAC

AAATATCATTCTGGGGAGCCACTGTAATTACGAATTTATTTTCAGCTATTCCATATATTGGTACAGATC

TTGTACAATGAATTTGAGGTGGATTTGCAGTCGATAATGCTACATTAACTCGATTCTTCACTTTTCATT

TTTTATTCCCGTTTATCGTAGCAGCAGCAACTATTATTCATATTCTTTTTATTCATCAAACAGGATCTA

ACAATCCGCTAGGAATTGTTAGTAATGTAGACAAAGTACCTTTTCATCCTTATTTTACATTTAAAGATA

TTACTGGATTTATCGTAATACTAGCAGGACTTATTCTATTAACATTATTAAACCCTTATTTATTGGGAG

ATCCAGACAACTTTATTCCCGCCAATCCACTTGTTACCCCTGCCCATATTCAACCGGAGTGATATTTTT

TATTTGCATATGCTATTTTACGATCAATTCCTAATAAATTAGGAGGTGTTATTGCCCTAGTAATATCTA

TCCTCATTTTATTAATCTTGCCTTTTACCCACGTAGCAAAATTTCGAAGATTAACGT-TTTATCCTTTA

AATCAACTTA-TATTTTGATCATTAGTAAGTATTGTCTTCTTATTAACTTGGATTGGGGCACGGCCCGT

TGAAGATCCTTATGTAATTACTGGTCAGATCCTGACTGTTCTTTATTTCTCTTATTATATTATTAACCC

ACTTACACT

Xiphosura CCTTTAATAAAAATTATCAATTCATCCCTTATTGATCTTCC

TTCACCATCAAACATTTCATATAT-ATGAAATTTCGGCTCCCTATTAATCCTCTCCCTATCAATCCAAA

TCTTAACGGGAATTTTCCTCTCCATGCATTATACATCTGACATTTCACTTGCATTTTCCAGAATCTCAC

ATATTTGCCGTGATGTAAACTACGGATGAATATTTCGAGTAATTCATGCAAACGGAGCTTCACTTTTCT

TTATCTGCCTTTATCTTCACGTAGGACGAGGTATTTATTATGGCTCTTACATAAATCACATAACATGAA

ATTCTGGCATTATCATTCTTCTCCTTTCAATAGCAACAGCATTTCTAGGCTATGTCCTCCCATGAGGAC

AAATATCCTTCTGAGGAGCAACAGTAATCACCAACTTAGTCTCAGCAATTCCATACATCGGGCAACTTC

TAGTCCAATGATTATGAGGAGGATTCTCAGTTGGTAATGCTACCCTCACCCGATTTTTTACTTTACACT

TTATATTACCATTCATAATTTTAGCTATAATTATACTTCATATTCTATTTCTTCACCAAACAGGATCTA

ATAACCCCTTAGGTATCAACAGAAACACCGACAAAATTCCTTTCCACCCTTACTTTTCCTCAAAGGACA

TTTTTGGCTTCCTTTTAATTTTAATACTATTTTCAGTAATTTCCATAACCTCCCCCTACTTATTGAGAG

ACCCAGAAAACTTCAATCCAGCTAATCCTCTTGTAACCCCAATTCATATTCAACCAGAATGATACTTCT

TATTTGCATATGCCATTCTACGATCAATCCCTAACAAATTAGGGGGAGTAATTGCACTTCTCCTTTCAA

TCCTTATTTTATTCATCCTCCCCCTTACTAATAACCCCAACTTTCGAAGCCTAAATT-TCTACCCCATC

AATCAATTCACT-TTCTGAGCCCTAATTTCCGTATTTATTCTCCTCACATGAATTGGCTCCCGTCCCGT

AGAAGAACCTTATGAACTAATTGGCCAAATTCTCACAATTACTTACTTTTCATATTTCATTATCAACCC

TATCCTTTT

[NAD1 nchar=941]

Annelida GAATATCCCGTTTTTTACATCTGTGTTAATAAGATTGG--T

ACTTGCGCTCCTAGCAATAGCCTTCTACACACTAATAGAGCGAAAATTCCTTGGGTACTTCCACCTACG

AAAAGGGCCTAATAAGGTAGGGCTAATGGGGCTTCCGCAACCATTTGCTGACGCAATTAAACTTTTTGT

AAAGGAGCAAGCTAAACCTAACCCCTCGAATCAAACCCCGTTTCTATTTGCCCCTACCATAGGATTAGT

TTTAGCTCTCT--TAATGTGAGTAATCTACCCCCATTCCCATCAATCATTTTTCATTCAATTTAGG-GT

CCTATATTTT---TTATGTGTATCAAGAATAAACGTATATACGACCTTTCTCGCTGGCTGAAGATCCAA

CTCTAAATATGCTCTACTGGGAGCTTTACGGGGGGTTGCTCAAACTATTTCATACGAGGTTAGAATATC

CTTAATTCTTCTCAGATCCTTAATTATTTTATCAACTATAGATTTCACTAAAAT-----ATTCTCG---

-TATTCCTGAATCCTATTTATATTTATTCCCTTGGCAGTAGTATGGTTCATTACTAATCTAGCAGAGAC

TAATCGAACCCCGTTCGATTTTGCAGAGGGCGAGTCAGAACTGGTATCCGGGTTTAATGTTGAGTACAG

GGCTGGCCTTTTTGCCTTAATCTTCATAGCAGAGTATGCAAATATCTTAATTATGAGCCTATTCACAAG

TGTTATTTTTATAAGGACCTGCGCTAGGGGTATAGCCAGAGATCTAGTCCTAATTCTTCAAACTATTAC

CTTAGCCATGCTCTTTGTGTGGGTTCGAGCAACATACCCCCGAATACGTTACGACCATCTAATAAACCT

CACATGAAAAAGATTTCTCCCCCT-ATCTCTAGCCCTATTAATGATATCTATTCCAATCGCAATAATGC

TGT

Arachnida ATGATT-TCATTTATT--AGTTTTATTTTTTTAATTT---T

ATGTGTTTTAGTAAGAATTGCTTTTTTTACTTTATTAGAACGAAAAATTTTAGGCTATGTTCATATTCG

TAAGGGTCCCAATAAGGTAGGTTTATGAGGTATTTTTCAACCGTTTAGAGATGCTGTAAAATTGTTTAG

AAAAGAAATAA-ATTTAATATTTTATATAAATATGTCTGTTTATATTTTAATGTC--TTTAATTTCG--

-TTAATATTAATAATATTTTTGTTGTTTTTATTCAAATGGAAATATAATCAAATTTTAATTGAGTATGG

ATTAGTTTTTATATTATGTGTATCCAGATTAAGAGTTTATGTAATTTTAATAGGAGGATGGTCTTCTAA

TTCTAAATATTCTTTATTAGGTGCTTATCGAGGTGTTGCTCAAGTAATTTCTTATGAAGTAAGATTTTC

TTTGCTTTTAATTAGAATTGTTTTTTTTTGTGGGAGTTATAATATCTATAATGTTAGAATTTTCCAAGA

TTTTTGAATATTTATAATGGGGTTTTTAAACTTGTTTTTAATTTGAATAGTTTCTTGTTATGCCGAAAC

TAACCGAAGTCCATTTGATTTATCTGAGGGAGAGTCAGAGCTAGTTTCAGGATTTAATGTAGAGTACGG

CTCATGAAATTTTGCATTATTATTTATGGCAGAGTATGGAAATATCATTATATTTAGATTAATTACA--

TCTTATTTATTTATAG------------GGT-----CTAGG-GGACTATTAATAATT-AATATGTTAAT

TGTGATAATTATTTTTATTTTAATTCGAGGGACTTTAGTACGGTACCGTTATGATAAATTAATAATATT

AGCGTGGAAAGTTATTTTACCATTTAGAATTATGATAATTTTTTTT-TTATGTTTTATAAAAATTATTA

TTA

Branchiopoda ATGATTCA-AGTGATT---CTCTTCTTAGTTGTGGTGG--T

GTGTGTTCTCGTGGGGGTAGCGTTTTTCACTTTATTTGAGCGTAAGCTATTAGGGTACATTCAGTTGCG

TAAGGGGCCTAATAAAGTAGGCTTGGGGGGGGTTCTTCAGCCCTTTTCTGACGCAATTAAATTGTTTTC

AAAGGAGCACGTTTCCCCTTCCACCTCTAACTATTCAGCCTTTTTAATTGCCCCTTGTTTTAGTTTGGG

GCTATCTCTTC--TTATATGGCTAAGAATTCCTTCTTTTTTTAATTTACTCTCTTTTAATAAGAGC-GT

ACTCTTTTTC---TTATGCGGTCTAGGCGTTGGTGTTTATGGGCTTCTCGCGGCAGGGTGGAGATCTAA

TTCTAAGTATTCTCTTATTGGATGTCTACGAGGAGTAGCCCAGACTGTTTCTTACGAGGTAAGATTAGT

TTTAATTTTGTTTACCCCTTTAGTAGTAACTGTGGGGTATGAGTTGGGCAGTTTCTCTTCTTTTCAAGA

AAATTTATGGTTTATTTTTATCTTTCCTGCCGCAGGATTAATTTGATTTATTTCTTGTCTTGCTGAGAC

TAATCGTACCCCATTCGATTTTGCTGAGGGGGAGTCTGAGCTTGTGTCGGGTTATAACACGGAGTACAG

AAGTGGGGGGTTTGCTTTAATTATATTAGCGGAGTATACTAGAATCTTATTTATATCTTTTCTATTTAG

TGTCATTTTTTTGGGG------------GGTGA---TTGTTCTTTTTTTGTGCTAGTCTCTTTTGGAGT

AATAGCTTTTATTTTTGTTTGAGTTCGAGGGACTCTTCCCCGATTTCGGTACGATAAATTAATATATTT

AGCTTGGAAGTTTTTCTTACCTTT-TTCTATTTCGTATTTAGTACTGATAGCAGGGCTATTAAGTATGT

TGT

Chilopoda ATTTTTTAATTTTATT--AGATAT-GTATTATTAGTTG--T

ATGTGTTTTAATTAGAGTTGCTTTTTTAACCTTGTTTGAGCGGAGGGGCTTAGGGTATATTCAGATCCG

TAAAGGTCCCAATAAAGTGGGACCTTTGGGTATTTTACAGCCCTTTGCTGACGCAATTAAGCTGTTCAC

AAAAGAGGGGGTGTTTCCCCTCACAAGAAATTTTTTAGCATATTATATTTGTCCTGTGTTAGGTTTAGG

ACTAAGTTTAG--GGGTATGAATAATTTACCCGGGGATTGGGGATCAATTTGATTTTCCTCTTGGG-TG

ATTATATTTT---TTGTCTTTCATTGCAGTAAGTGTATACGCTATTATTGGCTCTGGGTGGTTTTCTAA

CTCTAAGTATGCCTTATTAGGTGCTTTGCGGGCAGTTGCTCAGACTATTTCTTATGAGGTTTGTCTGGC

GATAGTTATTATTATATTAATGGTTTCTGTGGGCTCTTTTAATTTAGGTGTAATTTTAAATTGGCAGGA

GCAGTTTTTAATGATTTTTATATTCCTTCCTTTGTCTTTTATTTGAATTGTTATTATTTTAGCTGAAAC

TAATCGTACTCCTTTTGATTTTGCTGAGGGGGAGTCCGAGCTGGTGTCTGGATTTAATATTGAGTACGG

GAGAGGGGGATTTGCTTTGATTTTTATAGCGGAGTATGGAAGAATCCTTTTTATAAGAAGTATTTATGC

TCTCATGTTCTTGGGG------------GGC-----TCTACTTATTTACTTGGATTA-AAAGTTGCTGT

TATTTCTTTTGTGTTTATTTGGGTGCGGGGCCTTCTTCCTCGTTATCGTTATGATAAATTAATATATTT

GGCTTGAAAGATTCTTCTTCCTTT-TACGCTAAACTACTTTATTCTTTTA---TTTGGATTAACTTTTT

TTA

Diplopoda GTGATTATTAGTTAT---GGTATTAGTGTTGGAATTTG--T

ATGTGTGTTAGTTGGCGTTGCTTTTTTTACTTTATTAGAACGGAAGATTTTGGGATACGTTCAGGTTCG

GAAAGGACCTAATAAGGTAGGATTTTTAGGGTTAATGCAGCCTTTTGCTGACGCTATTAAATTATTTAC

TAAGGGGTTGGTATATGTGAGTGTGGGAAATTATAATATTTTTTATGTTAGTCCTGGTTTAATGCTGGG

TTTAATATTGT--GTATTTGGTCAGTTATGCCTTGAGTAGGGGGAGCCTTTGACTTTTCTTGGGGA-GT

CTTATATTTT---CTGTGTGTAAGAAGTCTTGGTGTATACTGTTTGTTTGGGTGTGGGTGAGCATCTAA

TTCAAAATATGGATTGTTAGGCGCTATGCGAGGTGTTGCTCAGACGATTTCTTATGAGGTGAGTTTGGC

GATAATCTTAATTGGAGTGGGTTTAATAGGGTTTAGTTATGATTTTTCTATATATGGGCTTATGCAGAA

CTATATTTGGTTTTGTTTGGTGGCTGGGCCTTTAGTTGTTTGTTGGGTAGCGTCTATTTTTGCAGAAAG

AAATCGAAGTCCTTTTGATTTTGCTGAAGGGGAGTCTGAGCTGGTGTCAGGGTTTAATGTAGAATATAG

AGGTGCATTATTTGCTTTTTTATTTATAGCAGAGTATGGAATAATAATAATAATAAGCTTAATGAGAGT

TGTTATATTTTTTGGG------------GGC-----CT----TAATTATTTTTATTT-AG--GGTTGTT

AATAATTATTCTTTATATTTGGGTTCGTGGTAGATTCCCTCGTTATCGCTATGATAAGCTAATGTATTT

AGTGTGAAAGAGTTTTTTACCATT-AGTTATGCATTGATTAGTTTTACTAGGTGGTATATTAGTTTTAG

TTG

Hexapoda TTTATTTATGTTTGTTTTAAATTTTTTATTATTAATTA--T

TTGTGTTTTAATTAGAGTTGCTTTTTTAACTTTAATGGAGCGTAAAGTATTAGGATATATTCACATTCG

AAAGGGTCCAAATAAGGTTGGGTTTTTAGGTATTCCTCAACCTTTTAGTGATGCTATTAAATTATTTTG

TAAGGAACAACCTATTCCTTTTATATCTAATTATTTTTTATATTATTTTTCACCTGTTTTTAATTTAAT

ATTATCTTTGT--TAATTTGAGTTATTTTTCCTTATTTAACTTATATGTGTTCTTTTCCTTATGGT---

-TTTTATTTT---CTATGTTGTACTAGATTGAGAGTTTATACATTTATAATTGCTGGTTGATCTTCTAA

TTCAAATTATGCATTATTGGGTTCTTTACGTTCTGTTGCTCAAACTATTTCTTATGAAGTAAGATTAGC

TTTAATTTTATTATCATTAATTATTTTAATTGGTAGTTTTAATATGCTTTATTTTATGAATTTTCAATT

ATATTGTTGATTTATTGTTTTTTCTTTCCCTTTAGCTTTATCTTTTTTTGGTTCTTCTTTAGCAGAAAC

TAACCGGACTCCTTTTGATTTTGCTGAAGGAGAGTCCGAGTTGGTTTCTGGGTTTAATATTGAGTATAG

AACTGGTGGTTTTACTTTAATTTTCCTTGCTGAATATTCTAGAATTATTTTCATAAGAATGTTATTTTC

ATTGATTTTTTTGGGT------------GGTGATTTTTATTCTTTTTATTTTTTTTTCAAGCTTTCTTT

AGTTTCTTTTTTTTTTGTGTGGGTTCGTGGTACTTTACCTCGTTTTCGTTATGATAAACTTATATATTT

GGCTTGAAAGAGTTATTTACCTTT-GTCTTTAAATTTTTTATTTTTTTTTATTGGTTTAAGGGTTATGT

TTT

Malacostraca ATTAATTATAGTTATT---AATTACTTATTATTAATCA--T

TTGTGTTCTAGTAGGGGTAGCATTTGTTACTTTACTGGAACGTAAAATTTTAGGTTATATTCAGATTCG

TAAAGGTCCTAATAAAGTTGGCTTTATAGGTTTGTTACAACCTTTTGCTGATGCTGTTAAGTTATTTAC

TAAAGAACAAACTTTACCTGTTATATCAAACTTTTTACCTTATTATTTCTCTCCTGTTTTTAGTCTATT

TGTTTCTTTAA--TTGTCTGATTAGTAATACCTTATGAACTAGGGTTAATAAACTTTACTATGAGT-AC

TTTATTTTTT---TTATGCTGTACTAGACTAGGTGTATACACCACTATAAGAGCTGGATGATCTTCTAA

TTCCAAATATTCCCTTTTAGGTAGATTACGAGCAGTAGCTCAAACAATTTCATATGAAGTAAGACTTGC

TTTAATTTTATTATCTTTTATTTTTTTAGTAGGGGGTTTTGATTTATGCTTATTTAGACTGTACCAACG

TGATGTGTGACTACTCTGATTTACTTTTCCCCTATCTTTAATTTGATTTGCCTCATGTTTAGCAGAGAC

TAACCGAACCCCTTTTGATTTCGCTGAGGGAGAATCTGAACTCGTATCTGGTTTTAATACTGAATATAG

AAGAGGTGGTTTTGCCTTAATCTTTATAGCTGAATATGCAAGAATCTTATTTATAAGAATACTATTCTC

TTTAATCTTTTTAGGA------------GGAGATTTAATCAGTCCTTTCTATTACTTAAAACTTGTAAT

AGTCGCTTTTGCTTTTGTTTGAGTCCGTGGTACTTTACCACGTTTCCGTTATGATAAGCTTATATATTT

GGCCTGAAAAAGATTCTTACCTGT-TGCTCTAAATTATTTAGTATTTTTTATAGGGGTAAAAACTATTT

GTT

Xiphosura GTTAATAAGTTTTATT--GTTTGTTATGTTGTTATTTTGAT

TTGTGTTTTAGTTGGGGTAGCTTTTTTAACTTTGTTGGAGCGAAGGATTTTAGGGTATATTCAGATTCG

TAAAGGGCCCAATAAAGTAGGAGTGATAGGAGTTTTACAACCTTTTTCTGATGCGATTAGGTTATTTTG

TAGGGAGCAGAGTTATCCTTTTTTATCTAATTTTTTATTTTATTTTGTAAGTCCGGTTTTTAGACTTTG

TTTGGCTTTGT--GTTTGTGATTAATTTTTCCTATTTTTTTTAATATGGTAGATTTTGAGTTAGGG-TT

ATTATTTTTT---TTATGTGTTTCTAGCTTTGGGGTTTATGCTATAATAGGAGCTGGTTGATCATCAAA

TTCTAAATATGCTATATTAGGAGCTTATCGGGCTGTGGCTCAAACTATTTCTTATGAGGTAAGTTTGGC

TCTTATTATTTTGTCTTGTGTTGTTTTAGTTGGGGGATATGACTTGTTGAGATTTGGGGGTGCTCAGAA

TGAGTGGTGAATGGTTTGGGGGTTTTTTCCTTTAGCGATTGTATGATTTTCATCTTGTTTAGCTGAGAC

AAATCGTTCTCCTTTTGATTTTGCTGAGGGGGAGTCTGAGTTGGTGTCTGGATTTAATGTGGAGTATAG

AAGAGGAGGATTTGCTCTTATTTTTATAGCTGAATATGGAAATATTTTGTTTATGAGATTGATTAGAGT

GGTAATTTTTCTTGGG------------GGT-----CTGGGGGGGATGTTTATTGGA-AAGGTAGTGAT

TTTAAGAATTTTGTTTTTGTGGGTTCGTGGGACTTTTCCTCGATTTCGTTATGATAGGTTAATGGGTTT

GGCGTGAAGGATTTATTTACCTTT-GGCATTAAATTATTTGCTTTT--TTCGTTTGGGGCTTGTTTGTT

TTT

[NAD2 nchar=1028]

Annelida CTACAATAGCTCTTG-CTATATCCACGCTAATTATAAGGAC

GCTCATAGCCGTATCAAGAGCCAATTGAATATTCCTTTGAGGGGCTATAGAACTTAATCTCTTAAGATT

TATTCCTATTATAATACAATCTAACAACAATCAAGAAACAGAGGGAGCTGTGAAATACTTTCTAGCTCA

AGCACTGGGATCAGCC-TTACTTCTAATGTCAAGAACATCTATATGAATAACATTCTCCATAATCTCAA

ACTTTATACCT-------TTAACTCTTATGGCCGCGATT---------ATACTAAAATTGGGCAGAGTT

CCCTGTCATTTCTGATACCCGTCAGTAATAGCTTCAATTTCATGAGTATCATGCCTAATCTTATCCTCC

TGACAAAAGCTGGCCCCCTTATC-TATTTTAGCCTTTTTACTCCCTCAAAAAAACATAAACTTTATACT

ATCAATAGCTGCAATAAATGCGCTGTTGGGGGGGGTGATCGGAATAAATCAAACTCAACTACGGACCAT

TATAGCATACTCCTCAATTGGGCATATCGGTTGAATGATAAGATTAGCTGCCGTATATAAGCCGAGTTC

TTGCATTATATATTTTGTAGTCTACTGCATTTTAATTACCCCTCTATTTATAACCATGGGCTATCTAAA

CATATTCTCTACTAAACACATAAGAAAACTTTCCTCCTATAGAAGAACTGTCCA-----CATAGCTTTA

TTGATAGTTCT---TCTATCATTGGGAGGACTACCCCCTTTTACAGGATTCATGCCAAAACTTATAACC

ATTATATTGTTAATGCAATC---CATAAAAATTATTCTACTTATCCTAATCGCGGGGTCTATTATAAAC

CTATTTTTCTATTTAAATATTATTATCTCTTCTATGCCCCTA------CCCCCACATCT-------AAA

AAATGTCGACTCCACTGATATTAAATGTTC--ATTAAAATTTGTTATTCCAATCTGTACCCTGTCATTA

GGGTTGAGACCTTTTATTATA

Arachnida ACCAAAAAATTATTT-TTTTATGAATTTTATTTATATCAAT

TTTAATAGGAATTTCATGTTCTTTTTGATTCCCACTATGGGTATCTTTAGAAATTAATATAATAATATT

TATTCCTTTAATAAACTCAAAAAACTTTCT---TTCATCAAACAGAATTATAAATTACTATATTATTCA

ATCATCCTCATCTTCA-TTATTTCTTTTTTCATCATTCTTAACTTTTCTTTTCTCAACTGACATATTAG

-TTTTAATTAT------TATGATTTCCATAATAATTA------------------AACTTGGTTCAGCA

CCTTTTCATATATGATTTCCTCAAATCTCTGAAGGTTTAAATTTTTTACCATTTTTTTTATTATTAACT

TTTCAAAAAATTATTCCCCTT---TTTATTACTACACTGATTA-AT---AATAGAGTTTTTATTTTTTT

------TATTATTACTTCTAGAATAATAGGATCTTTTGGTGGCCTTAATCAAACCTCTTTAAAAAAAAT

TTTAGCTTTTTCTTCCATTTCTCACTTAGCTTGAATAATGGCTTTAATTTTTTC---TAATCATAACTT

TTGGATATTATACTTATTTATTTATTCTATTATTTTAATGAAAATTATTAAA-------ACTTTTAAAA

AAAATTACA-ATTTTTCAATTTTTAATTTAAATTCAATAAAATTAACTTTTTTA--AAT-AAAATTACA

ATAATTTCTTTATTTTTATCATTAGGAGGTATGCCTCCTTTTTTAGGATTTTTTATAAAATGAATTTCT

GTTATTTTAATAATTAAGA---ATTTCCCAATAATTATAGTAATTTTAATTATTTCATCTCTTATTAAT

TTATTTTTTTATATTCGCATT---TTATACCCAATTTTTTTA------AATTTAAATAT-----TATTA

TTAAACCTAATC---AATTTTCTAATATTT---TTTCAATAAATTG-ATTATTTTTTCTAAATTTTTTA

GGGATTATTATTTTGACTCCA

Branchiopoda CCTTCTTTACTTCTAATAATCATCAGTATCGTAACAAGAAT

TTGTCTCGTGATTTCTTCTCCTTCTTTATTTATTTCATGGATTGGGTTAGAACTCAATACCTTAGCGTT

CTTACCCCTCCTTTTATCTAAAAAATCTAAATTGGCTAGAGAAGCCTCTATTAAGTACTTTCTTACTCA

GACTCTTGCTTCAGTT-TTAATCCTAGTAGGGGGATTGTGGTTTCTAGCCCCGTGAGGGGGGCTGGCAA

-CATTAACC---------CTCCTGCTGGGGTTAAGAATT---------------AAGCTGGGGGCTGCC

CCCTTCCACAGATGGGTCCTCTCTATCGCCGAGGCAAGAGGGTGGGTCCCTCTTTTTGCCCTGCTCACT

ATTCAAAAAATTAACCCCTTG----CTAATATTATGAATATTTTGCCATTTAAGAATGCCTTTTTTTTA

TGTGGTGGTCTTAAGCTCTTTAATCATAGGGGGGTTAGCAGGCCTAACTCAGACGAGAGTTCGATCAAT

CTTAACTTTTTCCTCAATCAATCATGTAGGCTGGTTGATGACAGCCTTAAGATT---TAGTTTAAGAGT

AGGGGCTTACTATTTTCTTATTTATTTAACGACTCTTCTTTGTTCGATCTTGATTTTCCACATATTTAA

CGTGTCTCACATTAATCAACTACCTCTTTT------GAGTTTTAAGCCCAGTAACCAGATGCTATTAT-

-TTTTCGCCCTG---CTATCGTTGGGGGGGCTGCCACCCTTCTTAGGGTTTCTTCCAAAGTGAATAATC

TTACAGCTAACTGTCTCTTACTCATTGCTTTTAGTTGGGGGGGTTATAATTAGTATAAGCTTAGTAGTC

TTGTTCTTCTACTTACGACTAA---TATTTTCGGCATTTATG------ATAGGGGGGGT-------GAA

CTTAACGACTTTAAGAAGAGACCCGCTCCCCTTTCCTGTTTACTTTGTTGCTCTCTTTTCAATTACTGG

GGGGGGGCTATCCATGATCTA

Chilopoda TACCTAAAATACTAT-TTACTTCTACCCTTGTAACTGGAAC

GGTTATTGTAATTTCTTCAAGAAGACTGATTTCTGCTTGAATTGGATTAGAACTGAATCTTCTATCCTT

TATTCCCTTAATAATCCAAGACTTCAATAAATCTTCAAGAGATGCCGCCTTAAAATATTTTCTTACTCA

AGCTTTTGCTTCTATT-TTCTTTTTATCTGCTGCACTATTCTTATTTAGTATAAATTTT-TATTATATC

TCTAATATAATCTCTAATACTGTTCTATTTTCAAGACTT---------GCCATAAAGATGGGTGCGGCC

CCTCTTCACTTTTGATTCCCAGGAGTTATACAAGGCATTTCGTGAAATAACTGCTTTATCTTAATAACT

TGACAAAAGCTTGCTCCCTTATT-TTTAATAACAATAGTAAAG------ACTGAAGCATTAATTATCTT

C------ATTTTAACCTCTGCCCTAGTTGGAGCAATCGGGGGATATAATCAAATACTAACTCGAAAAAT

CATAGCATATTCCTCAATTAATCATATTGGTTGAATACTGTCCTCAACCATAAT---TAACCAAAGGAT

GCTCCTTTTCTATTTTTTTATCTATTCACTAATAAGATTTATTATTATCATAATATTTATAAAATGGGG

AATTTCCCACCTTTCACAAATTTTAATAATA--AGAACATCAAAAACCCCCACACTAATTTTAGCCAC-

-TAACCTTCTC-------TCCTTAGGAGGAATCCCCCCCTTCTTAGGATTTTTACCTAAATGATTAATT

ATTTATCAAATAATAAGCAC---ACTCCCCCTACAAACTTTTATCTTAACAATATCCTCTTTAATTACC

CTATATTTTTACATCCGAATTTG-TTATACCCTAATACTAAA------GTCCCCTCTTT-----TATTC

GTCACAGCAAAATTTACTGTTGGAAAATTATTAATTAATATAACCCTCCTGTCTATGATGGGCGCGCTC

GTACTAGCCCCTTTAGCATAA

Diplopoda ATACCAAATTTATTTATCTTAAGATTACTTTTCTTTAGTAC

TGTAGTAGTGGCCACTTCAACATCATGATTTACAGCCTGAATTGGCTTAGAAATAAATGTAATAGCCTT

TATCCCCCTAATTATATCCTCAAGAAAAAC---CAGTTCTGAAGTAATAATTAAATATTTCTTAGTTCA

AGTCATAGGATCATTT-ATTCTACTATTAAGAGGGGTTCTAGCCCAGCAAGATAGACCAATAACTTTTA

TCTTCTTTCACCC----ACTCTGATCTATAATATTGACACTTGCACTCACAACTAAGCTGGGAATATTT

CCGATTTATTTTTGATTCCCAGCACTGGCAGAGGGCTTATCATGATCTTCCCTAGGACTCCTAATAACA

TGACAAAAACTAGCCCCCCTAAGACTTCTTATTATATCGCCAT-------TAAAACCCCTTTTAATAAT

CTCATTCGGCTTAGCTTCTGCTGTCCTAGGAGCTATTGCAGGCCTAAATCAAATAATACTTCGAAAACT

AATAGCCTACTCCTCAATCACCCACTTAGGCTGAATTACATCATTAATTCCCCTATCTTTCCAAGGAAC

---AATCTTTTATCTACTCATATATATCCTCCTAACAACAACAATTATTATTTTATTCTCCTCTTTCAA

TATAATTCATCTACTTCAA--TCTAATATGG---TAAGAACCAATACCCCTCTCTCCCTCACTGTCATT

TTCATTACCAC---CCTCTCCCTCGGAGGAATACCCCCCTTCTCTGGATTTATCCCAAAATGACTAACT

CTCCAAATACTTTCTCTAGAAAACCTTTATATTCAAGCCTTAATTTTAGTCTGAAGAAGTGTTCTCACA

CTCTTTTTTTATATACGAATCAA-CTATGCCTTACTAAT---------AACCAACCTCC-------AAA

TCCGCTTCCCCATACAACAACTTAGCATTATGCCCTGAACCAGTCTTTTTATCATTA--CAGCTAATCT

TGCTCTTCCCCTTATAGTTCT

Hexapoda CTATAAAACTTCTTT-TTCTATCATCGTTGATGATAGGAAC

GTACCTGTCCATTTCTTCAACTCCATGATTAGGAACTTGAATAGGACTAGAGATCAACTTACTATCTAT

TATTCCCATATTAACAGATAATAAAAATTCAATAATTAATGAACCAGCAATTAAATACTTTATTATTCA

ATCAATAGCATCAACA-ATATTATTAATTTCAATCTTAATTATTCAAATAAAATACATAATGTGATGAG

ATAATAAAAAC-------ATTCCATCAATAATAATTATGTCAAGCATAATAATAAAAATAGGAGCAGCA

CCATTTCACTTTTGACTTCCAGAAGTAATATCATCAACAAGATGAATTAACTGTCTCATACTAATAACA

TGACAAAAAATCGCTCCAATAAT-AACAATATCATATTGCATTAAAATAAGAAGATTCCTATTTGTAGT

A------ATTATAATAGGAATTATTGTTGGAGCAATAGGAGGTTTAAATCAAACATCACTACGACAAAT

TCTAGCATATTCATCAATTAGACACCTAGGATGAATAATTAGATCTATAACCAT---CAGAGAAAATAC

CTGAGAATTCTATTTTTTAATTTATTCA---ACATTAAATGTAATTATCATC----TTCATATTCAAAA

CAATAAATTTATTCTTCTTAAACCAAATCTA-TTCAGCAAGATATTTTAAAACAGAAATTAAATTCATG

ATAATAACATCACTTTTATCTCTAGGTGGGCTGCCACCAATACTAGGATTTCTACCAAAATGAATTGTA

ATACAATCATTAATTGATAATAAAATAACAGCTTTGGTATTATTAATAATTACATTCACAACCATCACA

TTATATTATTATATACGAATTAGATTTTCAGCAATTATTATACTACACAATGAAAACTCATGACTAACA

AGAATTAAAATAAATAAATTAGTAGTAGCCCTACCTATTCTATCAATAATCTCAACAATAGGATTAATT

TGTACATCAAACTTTATATTA

Malacostraca TCACAAGTCTTATTT-TTTTCTTCTCTCTCTTTAGGT--AC

CCTTCTCTCCATTTCTTCTTCGTCTTGATTCGGAGCTTGAATTGGACTTGAACTAAATCTAATATCTTT

TATTCCTTTAATTTCTTCAAAAAATAATCAATATTCCTCAGAAGCCGCTCTAAAATACTTTTTAATTCA

AGCTTTAGGTTCTTCGGTTATTATTATATCCGCCTCTTTTGTATTATCATCTAATGAACTAGCCATCA-

-TATTGATAAC------AGTGGCTCTTTTGTTAA---------------------AATCAGGAGCAGCT

CCATTTCATTTTTGATTCCCTAGAGTTATAGAAGGATTACAATGACCTCAAGTGATTATCTTGATAACA

ATTCAAAAAATTGCTCCCCTCTC-TTTATTATCATATACATTATATTCAAGTAATCTGCCCATTATTCC

AGCAGCTATTATCTCTTCCGCGTTAGTAGGAGCAATCGGAGGGATTAACCAAACTTTTTTACGTAAAAT

TATAGCTTATTCCTCTATTAATCATATAGCGTGGATAATATCAGCTATCTTGAT---TAGAGAAACGAA

CTGGTTATTATACTTTTCGTTTTATTGTTTTATTTCTACCTCAATTGTTATATTATTCAATTTTCAAGA

AGCTTTCCATATTTCTCATATTATAAATTA--TTCGTCACACTCACCGCAAATA--AAA-ATAATTA--

-TATTTTCCTCGTTATTATCTATAGGGGGTTTACCTCCTTTTACGGGATTTATTCCCAAGTGATTTATC

ATTCAAGAAATAATTTCCTCCCATATATTTGTTATTTTAATAGTCCTTCTTATATCGGCCCTTCTGACT

CTATTTTACTACTTGCGTATTG--CTATAAT-AGCATTTACA------ATTTCAAGTCC-----TAGTA

CTAAATGAGGTATAAAAATAATAAGTACATCCGTCTTAACACCTTC-ATTATTGTATATCAACTTATTT

GGTCTACTTGCCCCTAATCTA

Xiphosura ATTATCAACCTATTC-TCCTTACCACTCATTCTAGGG--AC

AATAATCACAATGAGATCTTCTTCTTGACTTATAGCTTGAATAGGCTTAGAAATAAATCTAATAGGATT

TATCCCACTTATCTCTACCCATTCAAACAAACGAGCCTCAGAAGCATCTCTTAAATATTTTCTTATTCA

AACAATTGCTTCCTCC-ACATTTCTATTCTCCTTTTTATTATCATCTTCCTTCTCTATTATTCAATTCA

-CTATAATAACCCCATGAATAATTCCTTTCATAGTTATTTTAACCCTAAGAGTTAAACTAGGAGCTGCC

CCCTTCCACATATGACTTCCAACAGTCGCAGAAGGATTATCTTGAACAAATTGCCTCATTTTAATATCA

TGACAAAAAATAGCCCCCCTC---TCCATCATCTCCATAATTT-TTCCAAAAAATCCCCTCATTATTAT

C---ATCGCCACCCTTTCTGCAATCAGAGGATCAATAGGGGGATTAAATCAAACATCTCTCCGAAAAAT

TTTAGCCTTTTCATCTATTTCTCATATAGCATGAATACTTTCCTCTATACTAAT---CTCAAAAATATT

ATGATTATTTTATATTTTTATCTACTCAATTATTATTTCTTCAATCATCTTATGTTTTGCCCCCTTCAA

CATACTCCACATTAATCAAGTTTCCACAAA---CCAAAATAAAAAACTTAATTC--TCTCATCACCAT-

-TAATCTCCTT-------TCTCTAGGAGGATTACCCCCTTTTCTAGGTTTTTTACCAAAATGGTTAATC

ATATTCTATTTACTTCAAATAAACATATTCCTCATAGTTTCAATTCTAATCATCTCAACTCTCATCAAT

CTCTATTATTATACTCGAATTTC-CTATTCCTCACTACTCTT------AATC--AATTC-----AAACA

ATAAATG-AATAAAAACAAAAACACCACCATTAACAAAGCAACTTCCACTTTCCATAATCTCATTATTT

GGTCTGATCACCTCAATATTA

[NAD3 nchar=356]

Annelida ATCCTTACAGCCTTATCCTCAGCCATTGCACTATTAGTCCCT

ATTATTATTTTGGGGGCAGCATGAGTTCTAGCTTCACGATCTACAGAAGATCGAGAAAAGTCATCTCCAT

TCGAGTGTGGGTTTGACCCAAAAAGAACCGCACGGATCCCATTCTCAACCCGATTTTTCTTATTGGCCAT

TATCTTTATCGTATTTGATATCGAGATTGTTCTTTTGATACCCCTACC--CACAATCTTA---CACACGA

GAGATGTATTTACCACTGTAACT--ACGTCTGTCCTATTTCTAATAATTCTTTTAATTGGTTTAATCCAT

GAGTGAAAGGAAGGATCTCTAGACTGATCTTCCT

Arachnida ATTAAATTACTAACGA---TTATTAT--AATTCCTTTTAC-

AATTTTTTTTATTTTTTTCTTAAT--CTCCTTCAAAAGATTT--TTAA--ATAAAGAAAAATTATCTCC

CTTTGAATGCGGATTTGATCCATTTTCCCTATCTCGAGTTCCTTTTTCTTTAAAATTTTTTTTAATCGC

CATTATTTTTTTAATTTTTGATATTGAAATTGTAATTATTCTACCTTTTCCTCTATTATTTTTTAATAA

AAACATAATATTTCTTATTACATTTATTATTATTAATATT-CTTATTAG---------ATGAGGACTAA

TTTATGAATGAAAAAAAGGTATACTTGAATGATTAAAAT

Branchiopoda TTTCAGCTAATAATTTTTACCCCCCTAATTTTGACAATTAG

ATCTGTGGTCTTGGTCCTTTCTCTAGCTCTCAGAAAAAAAAGTAAAATAAATCGAGAGAAGTCTTCGCC

TTTTGAATGTGGGTTTGACGCAAATTCTAACCAGCGCCTTCCTTTCTCGCTCCGTTTTTTCTTAGTAAC

AATTATCTTTTTAATCTTTGATGTCGAGATTGTTATCCTGTTCCCTGCTAT--TCAAAGCATT---TTT

ACCTCACAAGAATTTTA--CTGAAATTTTATTTTTATTTCTTTTCTAATTATTTTGTTGGGGGGACTTT

TTCATGAATGAAAACAAGGAAGTCTTAACTGAGCTATCT

Chilopoda ATATTAATTGTAATATCACTAATTTTTATCATAAGTCTAGC

CATAATTGTGATATTAGTCGCAACCATCATTAACCTTAAAGCAAATAAAGATCGGGAAAAATCCTCTCC

TTTTGAGTGCGGATTTTCCCCCTTCAACACAGCCCGAATCCCCTTTTCTTTACGTTTTTTTTTAATTGC

TGTAATCTTCTTAATTTTTGATGTCGAGATTACCCTACTTTTACCCGCCCC--AATTCTCCTT-----A

CAAGAGGATCCCCAACAATTGTATTCTTTACAATAACAATATTCCTAGTATTACTAATCCTGGGCCTTT

ATTATGAATGAAAAAAAGGTGCACTTGACTGAACCTCAT

Diplopoda CTACTAAATGTCATACTCTCAATTATCATTGTCATCCT---

CCTAATTCTAAGCCTAATTCCATTTATAACTCAAACCAACCTCCTTAC---CCGAAAATATTCCTCGCC

ATTCGAATGCGGATTTGACCCCTTTCAAACAAATCGAATAGAATTTTCCCTCCAATTTTTCCTAATTGC

CGTAATCTTCTTAGTGTTTGACGTAGAAATTACTATCCTTCTCCCCCTCCC--CGTTCTCCTT-----A

ATAAAATTCCTCCTACTACATTTCTCCCCATCTTCATCCTCATCATAGTAATCCTAATCGTTGGGTTAA

TCTACGAATGAACTAAGGGAGCCCTATCCTGAGCCTTAT

Hexapoda ATAATATTAATAACAAGAATTACTATTAGATTTTTATTACC

AATAATTGTTATATTATTAGCAACAACCCTATCAAAAAAATCAATTAATGATCGAGAAAAAAGTTCACC

ATTTGAATGTGGATTTGACCC------TAAATTAAATATACCTTTCTCAATTCAATTCTTCCTAATTGC

AGTAATCTTCCTAATTTTTGATGTAGAAATTGCATTAATTTTACCAAT-----TGTAATTATT--ATAA

AAACATCAAATATTATAGTATGAACATTATCAACAATACTATTTATTATTATTCTATTAGTAGGACTTT

ATTATGAATGAAATCAAGGAGCACTTAAATGAGCTAATT

Malacostraca ATTATTTTATTAATTTCAATTTTAGTTACTCTAATTATTAG

AACAGTAGTTATAATTCTTGCTTCTCTTTTATCAAAAAAAACAATTATAGACCGAGAGAAAAATTCCCC

TTTTGAGTGTGGATTTGACCCTAAAGGATCCGCTCGTCTTCCTTTTTCGCTTCGTTTTTTCTTAATTGC

TGTTATTTTTTTAATCTTTGATGTAGAGATTACGCTTTTACTTCCTTTGGC--TATTATTATT---A--

ACTTTTCAAATATTTCAGCTTGAATCCTCACAGGATTCACTTTTATTATTATTCTCCTTATTGGGTTAT

ACCATGAATGAAATCAAGGAGCCCTAGAATGAGCTTATT

Xiphosura AAATCAATCCTAACCTCAATCATTTTATCAATTACATTAAG

ATTCATTCTTATTATTCTATCTCTAATCTTATCCAAAAAATCCACCCTAGATAAAGAAAAAAGATCTCC

TTACGAATGTGGATTCAATCCATTCTCATCCTCCCGAATTCCATTTTCCCTACGATTCTTTTTAATTTC

AATTATCTTCCTAATTTTTGATGTAGAAATCGCCTTACTACTTCCCATCCC--ACTAACTACC------

-TCTTTAAAAAACT-----CTATAATT--ACCTTATCCATCTTCCTAATAATTCTAATTTTAGGCCTAT

TCCATGAATGAAATCAAGGAGCATTAGAGTGAGCAAATT

[NAD4 nchar=1375]

Annelida ATGTTAAAGCTCCAAATAGTATTAATATCTCTGCTCC----

---TACTCCCACTCATTGTAAATCTGTACCCCTG--AATTATCGCTCTGACTCTTAGAGCTTTATTACT

ACCCACCTGTTTCAAT---TTGGTAAACAGAGCATCCTACTCAATATTTACAGAATACATATCCTCTGA

TATAATGTCATTTACACTCTCCGCTCTAACAATCT-GAGTCACTGTAATAATAATCCTCGCAAGAACTA

AAATTATGCATTTAAATATGTACCCCAAAATATTTATGACAAACTTAGTTATTTTGCTAATTATTCTAA

TTAATTGCTTCTTATC---CCCCAATCTAATT-ATATTTTATATTTGATTTGAAGCATCCTTAATTCCA

ACTATAGTGCTAATCATGACTTGGGGCTATCAGCCAGAACGATCTCAAGCAAGAATATATTTAATAATC

TATACAGTCGCTGCCTCCCTCCCAATGCTTATAGT-GCTATGTAAAATTTTTATCGTGTCCAAAACAGC

TATGATACCCATATTCATAAACATGGAGTTCCCTATA-GACTACCCATCTATGGCCCTAGCCTGAGTAT

TAACACTGGGGGGCTTTCTAGTAAAACTCCCTATATTTACAGTGCACCTCTGACTTCCTAAAGCACACG

TAGAAGCCCCAATCGCAGGGTCTATAATTTTAGCTGCAATTCTTCTAAAACTTGGGGGTTACGGCATTC

TTCGCATACTA----AGATTATTTCACTATATAGCTAAATCAACCTCAAGACTTCTTTCTAGGGTAGCT

TTAGTCGGGGCAGTCTCAACAAGATTAATCTGTCTCCGCCAATCAGACCTAAAATCCCTAATTGCTTAC

TCATCTGTTGGACATATGGGTCTAATAGTCGCGGGCGCTTTAATAAGCTCTAATTGGGGGTTCCAAGCA

GCTCTAGCTATAATAATTGCCCATGGGCTGAGCTCATCCGCCCTATTTGTAATAGCAAATATAAACTAT

GAATTAACCCATACTCGAAGCCTATTCTTAATAAAGGGCTTGTTAGTTTTAGCACCGACGCTCACTATA

TGGTGATTCCTGTT-TACAGCTAGAAATATAGCAGCCCCCCCTTCCATTAACCTACTCAGAGAGATTAT

GTTAATTACATCTATTTTAAAAATATCTACTTCAGCTTTTATTCTTCTAGGTCTAACAAGATTCTTTAC

AGCTGCTTATTGTTTGTACATGTATACTTCTATACACCACGGACCCTTAATACTAACCTCTAACCCAAT

CCCTCAATTCAAAGTAAAAGACCTAACTCTTATAACTATACACTTAGTTCCTACAATTCTTATTATCTT

TAAGCCTGAACTAATCACAAGAT

Arachnida ATGTTAAAATTATTGTTTTCTTTATTTATGATAATT-----

-----TGAATATCAATAATTTTTAAGGGGTTAG------AATTAATTTTAATACTTTTTTTATTTTTGA

GATTAGTTTTTATAAA--TTTAGTAGATAGAGG---AAGATTAATTTTTAAATTAGGTGGA------GA

TTTATTAAGAATAAATTTATTTTTACTTTCGGTAT-GAATAACAATTCTAATAATATTAGCTAGATTCA

AAGAAATGCTTTATGAAAATAAATATTTTAAATTTTATCTTTTTTTTATGTTGTTTTTACTTTATTTAT

G---------TTTTTATAGAATAAATTTGATA-ATATTTTATTTTTTTTTTGAATCTATTTTATTTCCC

ATTATTATAATAATTTTTAATTGAGGTAATCAACCTGAGCGTTTACAAGCGGGTATTTATATACTTATA

TATACTTTACTTGGTTCATTACCTTTATT--T----ATTTTAA--TAATTT--TATTAAGGGAAT--AT

AGT-TTAAATTA---TTTATTAATAGATTTTAGAGTA----TTTAAGCCTATAGGTTATCCTTTTTTTT

TTATAATATTAGGGTTTTTAGTAAAAGTTCCTATGTTTTTTGTACATTTATGGCTTCCAAAAGCTCATG

TGGAAGCTCCCATTTCTGGCTCTATAATTTTAGCTGCTGTTCTGTTGAAATTAGGAATTTATGGAATTT

ATCG--TTTTAAAATGTTTTTTATAAGTGAATTAATAGAAATAAGATATATGATTATAGTTATTTCTAT

TTTGGGG--AGAGTAATAGTAGGTGTAATATGTTTATTTCAAACAGATGTGAAGTCTTTAATTGCTTAC

TCATCAGTATGTCATATAGGAATTGTTCTTAGAGGAACAATGAGAATAAATTTTTTAAGTTCTTTTGGG

AGTTTGTTGTTAATATTAGGCCATGGACTTTGCTCATCTGGGTTATTTTGTTTAGGTAATATATTATAT

GAGCGTTTTTTCACTCGGAGATTATTATTATTAAAGGGAATAAATAAAATTTTTCCTTCAGTCTCTTTA

TGGTGATTTTTAAT-AAGAGTATTTAATATAGCAGCACCTCCTTCAATAAATATTTTTGGGGAAATTTT

TTTATTAGGGAGATTACTAAAATTTAGTATAATATTTTTATTTCCTTTAATGCTATTATTATTTTTAAG

AGCTGGATACTCGTTGTATTTGTTTAGATATATCAATCATGGGGAAGGTTGGGTAACATGAGCTTCAAA

TT---TAATTTCTCTGCGGGAACATTCTTTAATATTTTTGCATTTTTTCCCTTTAATTGTGTGAGTTTT

AAAAATA-GAGTGTTTTCAAGGC

Branchiopoda ATGTTAAAATTCATTTTGATGGGGTCTTGTATAACGC----

-----TATTTTTTAGTAACTGAGGGGTGGCAGTTACATTGCTTTTTTTTATAGCTTTTGTTTTTGGAGT

GGGGATAAGCGGGTTTGGATTAGGCC---------------TAGTTAATCTCATTCAGGTT------GA

TTTAATATCTTACTTTCTAAGATACTTATCTATTT-GAATTCTAGCCATGATGATCATAATAAGCTTTT

ATGTCAAAGATCACAAGAGTTTCCCAGAAGTCTTTTTAGGGTTGGGAGTGGGAATACTAATTTTTCTAT

TAGT----GAGCTTCGGAACTTCAGATCTTTTGATATATTATATTGCTTTTGAGACTACTCTAATTCCT

ATTTTTTTACTAGTTATGGGTTGGGGGTACCAACCCGAACGTATCTCTGCTTCTTACTTCCTTTTATTT

TACACCCTTGCTGCCTCCCTGCCCTTACTTTTGGGTATCCT---CTGAGTTAACTTTACGGACTGCAGT

CTTGACTACTTTTTTTTAGGGCAGGGGGCCCAAT-------TTTCTAATCCTATCTTAT-TTTGATTAA

TACTG---TTGGCGTTTCTAGTCAAGCTTCCCGTATATTTTGGACATTTGTGACTTCCTAAGGCCCATG

TTGAGGCCCCAGTTGCAGGGTCTATAATTCTAGCGGGGGTTTTATTAAAGTTAGGGGGGTACGGAATAG

TTCGAGTTGTC----CCTTACATCGAATTAAGTCTTAGTGAGTTTTCTAGTTTTCTTATGAGAGTTAGA

CTTGTGGGAGGGGTGACTGCCTCTGTTATTTGCATCCGCCAAACTGACTGTAAATCGTTAGTAGCTTAC

TCTTCAGTAGCTCATATAGCTTTAGTTCTTTTAGGGGTGGTTATTAACTCTTCTGTTGGATTGGCGGGT

GTAGTAACGATTATAATTAGTCACGGCCTCTGTTCTTCGGGGCTATTCAGATTAGTCGGGATAATCTAC

GAGCGTATGGGGACTCGAAGAATTATTTTAATTCGTAGTTTAATTACTTTAGCCCCTCTCTCTACTTTG

TGGTGGTTTCTTTT-TGCTATTAGTAATATAGCTGCCCCCCCATCACCCAATCTCTTGGGTGAGATTTA

CTTATTTATCTCGTCGATTGGGTGATGGGGGGGCAGCTCCCTCCTCGTGGGGGGGCTTTCTTTTATAGC

AGGGGCCTATAACTTGTTTTTATTTGTGTCTACCCAACATGGAACAGACAGCTTCTTATCGAATAGAAT

GGGGGACTGTTCTTTTCGTGAGCATCTGGTGTTATTCTTACACATGGCACCATTTATTCTTCTTTTTCC

TGTTCTATCCCATCTTTTTCTGT

Chilopoda ATTTTATTTAGTTTAATAGGTTTGATTTTAAGAATGA----

-TTTATTTTAATGAATGGAGCTATTATTTTTGTGGATATATGCTTATTGGGGTATTAGTGTGTATTAAG

GGATATAACGAGGGATGGTTTTATTTTTCGA----------TTAGTTTGGGGACTGCAATG------GA

TTTATTAAGATGAAATTTAATTTACCTTACCTTTT-GGGTAAGTAGTCTAATAATAATGGCAAGAGTTA

TGGTATTTGTTAAGCGGAATTTTGCCACTGAATTTTGCGTGGTGGTTGG---GCTTTTGACTTTATCTT

TGGTTATGGTCTTTTT-AGTCAGCGATTTTTTATGATTTTATATTTTCTTTGAGGGGTCACTGATCCCT

ACTCTTTTTTTAATTTCTGGGTGGGGGTATCAGCCGGAGCGTTTAAAGGCGGGGATCTACCTTTTCTTT

TATACTATATGCGGGTCTTTGCCCTTATTGTTAGGAATTTTATTTTTGTCTAGGGAATTTTTAGGGACT

AATTTTCATATTTTCTTTATAGAAGAAATTAGA-------------AGTCTTGTATTATATTTTAGTTT

CACAT----TAGCATTTTTAGTAAGGATACCTATATTTTTAACCCATCTTTGACTCCCTAGGGCGCATG

TAGAGGCCCCTATTTCAGGCTCCATAGTACTTGCAGGGGTTTTATTAAAGCTTGGGGGGTACGGGATTT

TACGTGGTGCG----TATTTATTTTCTTTAGAGATTTTAGTTGTAGGGAAGATTTTAGTGGTATTAAGA

CTTTGAGGGGGGTTTATTTTAAGTCTTTTATGTTTACGACAATTTGATTTAAAGTCCTTAATTGCCTAC

TCTTCAGTGGTTCATATAGGAATAGTAATTGGGGGCTTAATAATGATGAATTATTGAGGGTTTCAGGGG

GTTTTAATTTTAATAATTGGGCACGGACTTTGTTCGTCAGGAATATTTGCTGCAGCAAATATTCTTTAC

GAGCGAGGAGGCACCCGTAGTATAGTGCTAAACAGGGGGATGATTAGAATTTTTCCGAGTTTTATCTTA

TGATGATTCTTGTT-GTGTGTTAGAAATATGGCTGCCCCCCCAAGCTTAAATCTTCTAGGAGAAATTAG

ATTAATAATTTCTTTAATAATTTGGTCAAAAAGAATTTTTTTACTTTTATCCCTTCTATCTTTTTTTAG

CGCAGCGTATTCTTTGTATATTTTTTCTTTAGTCAGCCATGG-AAGCCCTTCTTTACATTTTAGCTTTT

TTG--ATATCAAGTCTCGTGAGCTGATGTTGCTGATTTTCCACTGAGTTCCCCTGAATGTCTTAGTGCT

TAAGGGGGATTTATTAATAGCTT

Diplopoda TTGGCTGGGCTTTTAATGGGGTTGGTAATGGGGGGAT---G

GTTAGAATTGAGTTTTGCAGTGGAAGTTATTGTATTAGGTTTAGTTCTAAGCGCTAGAATTAGCTTACT

ATATATTAATTATCAAGATTTGATAATAAGGGT------GTTTGGCTTAGGATTAGGGGGA------GA

TATAATGTCTGTAGGATTGATTTGACTTAGTATAT-GAATTACTTTGTTAATATTAATGGCTAGCCTGA

AG-------AGAGGAAACGTAAATAGATGA--TTTATGAGCTTAGTGGT---GAGATTGGTTATTTTGC

TTTTAGGAGTTTTTTTGAGTATAGATTTAGTT-TGATTTTATGTGATGTTTGAAGGAGTATTAGTGCCC

ACTTTTCTTTTAATTGTTGGGTATGGATATCAGCCTGAGCGTTTACAGGCAGGCTTATATTTGATTTTT

TATACTGTATTTGCTTCATTGCCTTTGTTGCTTATGGTTTT---GTGGTGGGGAAGTCAGGGATGTAGA

AGTTCTGTAATGCATTTGATTAATTGTGTTGAGGGAG----GGGTTGGGTTTGTTTTGTATTTAGCGGG

GATTG----GGGCATTTTTAGTAAAAATGCCTTTGTTTTTAGTTCATTTGTGATTACCCAAGGCTCATG

TAGAAGCACCTATTTCAGGTTCAATGGTGTTGGCTGGAGTATTATTGAAGATGGGGGGTTTTGGGTTGA

TCCGTGTATGT----CCTTTATTTGTTAGTTGAATTAGGATAACAAGATGATTTTGGGTAAGTTTGAGC

TTGTGGGGAGGAGTTTATTTGAGCTTAGTTTGTTTGCGGCAGGGGGACGTGAAATCTTTAATTGCTTAT

TCTTCTGTTGTTCATATAGGTTTAGTAGTGGGGGGAATTATGTCTTTAAGTGTAATTGGTTTTATAGGT

AGATATATCTTAATAGTAGGGCATGGTTTATGTTCTTCGGGGTTGTTTTGTTTGGCTAATATTACTTAT

GATCGAGTGGGTAGACGAAGAATTTTGGTAACAAGGGGATTTTTAACCCTGATTCCTAGAGGGAGATTA

GTGTGATTTCTTTTATTGAGCGCT-AATATGGCAGCGCCTCCTACTATTAATTTGTTGGGGGAGATTAG

TTTGTTGGGGAGAATTTTGGGGTGGAGTAGAATATCTTTAGTGGGTCTGGGGTTGGTATCTTTTTTTAG

AGCTAGTTATTCACTTTATTTATTCACTAGAAGTCAGCATGGTGAGACGATAGGGGGAGTGGGGGGCTT

TGAGGGATTTTATCTAAGTGAATATTTACTTTTGTTGTTACATTGAATTCCGTTAAACTTTGTTTTTAT

TAAAAGTGATTTGT--TTGTATT

Hexapoda ATGCTAAAGTACTTATTTATAATTATTTTTTTGATCCCTAT

TTGTTTATTAGGTAATTGTTGATGATTAGTTCATTCCTTAATTTTTTTATTAAGTTTTATTTTTATAAT

TTCTTTATATTCTTAC--TCTGATTT--AAGA----ATGATTAGTTATTAT-TTTGGTGTT------GA

TTTTTATTCTTTTATATTGATTTTATTGAGTCTTT-GAATTTGTTGTTTAATAATTACTGCAAGAAGAT

CAATTTATTCTTCTTCTTATCATCCAAATTTTTTTGTTTTTGTTGTTTTATTATTATTAATTATATTGT

TTTG---TTCTTTTTCTAGTTTAAATTTATTT-TCTTTTTATATTTTTTTTGAATCTAGATTGGTTCCT

ACTTTGTTTTTGATTTTGGGTTGAGGTTATCAACCTGAACGTTTACAGGCTGGTGTTTATTTAATGTTT

TATACTTTAGTTGCTAGATTACCTTTATTGTT----GGTTTTGTTTAGGAT--TAATGATTTATTTAAT

ACT-CTTTATTATCCTTTATTAATTGATTTTG---------GTTCTTTTTATTTTTTGTTTTATGTTTT

TTCTA-TTTTTGCTTTTTTAGTTAAGATACCAATTTTTTTATTTCATCTTTGACTCCCTAAGGCTCATG

TTGAAGCTCCAATTTCTGGTAGAATAATTTTGGCTGGTATTTTATTAAAGTTGGGTGGTTATGGTATTT

TTCGTATAATAAAGGTTATTTCTTGTTTGGGTTTAAGATTTAATTATTTTGTTTTATCTTTAAGATTGT

TTGGTG---GTGTTATTATTAGATTTG-TTTGTTTTCGTCAAGTTGATTTAAAGTCTTTAATTGCTTAT

TCTTCTGTTGCTCATATAAGATTAGTTATCTGTGGTTTAATAACTATAAATTGATGAGGTTGTATGGGT

TCTTTATCATTAATGATTGGTCATGGAATTAGTTCTTCTGGTTTATTTTGTTTATCTAATATTATTTAT

GAGCTTTTAGGTAGCCGTAGATTATTAATTAACAAGGGTATAATTAATTTAATACCTAGAATGACTATT

TGGTGATTTCTTTT-AAGATCTTCTAATATGGCTTCTCCTCCGTCTTTAAATCTTTTAGGAGAATTTAG

TTTATTAAATAGAATTATTTCTTGGTCTTCTTATATAATTTTATTGTTGATTTTTTTATCTTTTTTTAG

AGCTGTATATACATTATATATATATTCTTATTCTCAACATGGTTTATATTATTCTGGTGTTTATACTTG

TTCTTTAGGTTATTTTCGTGAATATCATCTTTTATTTTTACATTGATTTCCTCTTAATTTGTTA-TGTT

TAAAGGGTGAATATTTTTATTTT

Malacostraca ATGTTAAAATTCTTATTATCTTGTATTATATTGATAC----

-----TGCTGGTAAATAACTGATGAGCTGTTCA------AAGTTCTTTATTTATTCTTTCTTTCTTAAT

AATTATTTATTGTCAT--CATGATTTTTACAATTACATAATAGGGTGATGT-TTCAGAGTT------GA

TTCTTTGGGTTATATCCTAATCTTATTAAGTTTTT-GGATTACTGCTCTCGTTGTTTGCTCAAGACAAA

AAGTTTTAAAAGATAATAACTATCCATCTCTATTTTTACTGGTTAATATCTTTCTTTTATTTTTTTTAT

TAAT---AACTTTTTC-AGTTAATGATTACTTGTTGTTTTATATCAGTTTTGAGAGATCTTTAATTCCT

ACTTTAGTTCTTATTTTAGGTTGAGGTTATCAGCCCGAACGATTGCAGGCTGGGGTATATATGTTATTT

TATACTCTATTTGCTTCATTACCTCTTTTACT----ATCTTTAATTAGTTT--ATATAATATAAGAGGC

AGC-TTAACTTTAGGTTTAGTAGAAAATGTAGAGGGAAGAGGTTTTATCTCCTGTTTATGATATGTGGT

AACTG-TCTTTGCTTTTATTGTAAAATTACCTATATTTTTAGTTCATTTATGATTACCAAAAGCTCATG

TAGAAGCACCTGTTGCGGGTTCAATAATTCTGGCAGGCGTTTTATTAAAACTAGGAGGTTATGGATTGA

TTCGAGTATTA----TTTTTATTTGGGGAAGCCAACAAGAGTATATCTTGATTGTGAATTAGAATTAGT

TTAGTAGGAGGGGTAGTAGTAAGTCTGATATGTTTACGTCAAGTAGATATAAAGGCTTTAATTGCTTAT

TCTTCTGTAGCTCATATAGGTCTTGTTTTATCAGGTCTTGTAGTATTTGGTTGATGAGGTTTAAATGGG

GCAGTAGTAGTTATAATTGGTCACGGTTTATGTTCTTCTGGTTTATTCTGCTTGGCTAATATGGTTTAT

GAGCGAGTAGGGAGTCGAAGATTATTAATTAGTAAAGGATTAATAAATTTTATACCTAGAATAGCATTG

TGATGATTCCTTTT-GAGAGCAGGTAACATGGCTGCTCCTCCTACTCTAAATCTCTTAGGTGAAATTAG

ATTAATTATTAGAGTAGTATCATGAAGAAAGGTAAGAATATTATTCATTGCTTTATTATCTTTTTTTAG

ATTTAGTTATACTTTATATATATTTTCTTTAAGACAACATGGTAAATACTACAGAGCTTTATTTTCATG

TTGCTCCGGTAAGGTTCGAGAATATCTGATCTTAATACTACATTGGTTACCTTTAAATGCTTTAATTTT

AAAAAGAAGAGTGCTTATGTGTT

Xiphosura ATGTTAGGTATTTTTATATTTTTATTTATATTGAGTT---T

GTGTACCTTTGTTTGTTCATGGGAAGTTATTCAGTTTGGGTTGTTTTTTGTAAGTTTTTTGAGTCTACT

ATTTATCTATCGTTTT--TCTGGGTTTAACTGT-------TTTTCTTTAATACTAGGGGGA------GA

TTTGTTAAGT-TATTCTTTATTTGGATTGTCTTGTTGAATTTGTTCTTTAATGTTAATGGCTAGATATA

AGGTTTATAAAAATAATAATGAAAAGGTAAAGTTCTCATTCTTGGTTGTTTTGAGTTTAGTTTTTTTGT

TTTTGAGATTTTGTT---GTTTAGATTTATTA-TTTTTTTATGTTTCTTTTGAATCTGTTTTAATTCCT

ACTTTGTTAATGATTATTGGTTGAGGGGGTCAGCCTGAACGTCTTCAGGCTGGGATTTATATGCTTTTT

TATACATTATGTGCTTCTCTACCTTTTTTGGTAGGTATTTTTAGGTTATATGGATGTGAGGGGAGT-GC

GGTGTTTTATTATTTAGAATTGAAAGGGGTAAGTATG----GGGT-GGTTTTGATTT----TTTGTATT

TGTTG----TTGCTTTTTTGGTGAAGCTTCCTATGTTTTTATTTCATCTTTGGTTACCAAAGGCTCATG

TGGAGGCTCCTATTGCAGGGTCAATGGTGTTAGCAGGGGTTTTATTGAAGCTAGGGGGGTATGGATTGT

TTCGGGTATTA----TGATTATTTCAGAGTTTTGTAAAAAGTCAGGGTGGATGATTGGTAAGAGTAGGA

TTAATTGGGGGATTATTTACTAGATTTATTTGTATGCGTCAGGTTGATTTGAAGTCTTTAATTGCTTAT

TCTTCTGTTGGTCATATGGGAATTGTTTTAGGGGGTGTAATAACACTAAGAAGATGAGGATGTGGGGGG

GCTCTTTTATTGATGGTTGCTCATGGATTGTGTTCTTCTGCATTATTTTGTTTAGCAAATGTTGTGTAT

GAACGCTTTTTTTCTCGAAGATTAGTGTTGTTAAGGGGTATAATAAGAGTGTTTCCTTCGTTGGCTTTA

TGATGGTTTTTGTT-TTGTGTGTTTAATATGGCGGCTCCTCCTTCAATAAATTTATTTGGAGAGATTTC

TTTAATGGTGAGATTGGTGGGATGAAGAGAATGAACTGTAGTATGTTTAGGGATGTTATCTTTTTTTTC

GGCTTATTATTCTTTGTTTATGTTTTCTTCTACACAGCATGG-AAAAAGTT--GAGCAGTTTTTTGTAT

TGAAGGGGTTAATTTTCGTGAATTTTTGTTGTTACTTTTACATTTAGTTCCTTTAAATTTATTGATTTT

GAATCTTGATTTGTGATTATATT

[NAD4l nchar=283]

Annelida ATTATAAGTTTAGTCTTTCTCCTTCCAAT--CGTCGCTGTT

GTAAATCTAATC-TCAAATCAATCACACTTTTTAATAACTCTTCTATCACTTGAAGGTATCACACTGAG

ACTGGTTCTATTTGTTCCAATCTCTCTCTCTATTATAAGTGCCTCTAATGTTAG---AATTAGGGTCAT

TTTATTGACTTTCGGGGCATGTGAGGCCAGCTTAGGACTAAGCCTCATGGTATTAATATCCCGATCCTA

CGGAACTGATATATTAAACTCACTTACAGCAAATA

Arachnida ATGTTAGAGTTAGCGATTTTTATAT-ATT-TAGTAGGATTA

ATAAGTTTTTTA-AAAAACCGTTTTTATTTAATGATAATGTTATTAAGTTTTGAGTTTATATATTTAA-

---GAATGTTTATATT--AATTAATTGTATAATTTTAA------TGGATACTTATTTATTAACGTTAGT

TTATTTAACTATAATTGTAGCAGAAGCTGGGTTAGGTTTAAGATTAATAGTAATTATAAGTTT-TTTTA

TGGTAATGATCAAGTTTCATCAATGTTCATATTAA

Branchiopoda TTGTTTTATTAA-TAGGGTCCATATTAAT-TTTTCTT---T

TTAGATTTATT--TCTAAACGTAAGCATCTTCTGGCTACTTTACTTAGTTTAGAGGGTTTGATGCTTA-

-----TGATTTTTGGT--GTTCT-TTTTTGGGTGAGATCTATGGTGAGTTTTAGAAATTTTGTTCTAAT

TTTTTTGACTCTTACAGCTTGCGAGGGAGCTTTAGGGCTCTCACTATTAGTTTCACTGGTCCGAACCCA

TGGCGGAGACAACTTTAACTCTTTAAACGCGCTAC

Chilopoda ATTTTTATAGTGTCTATCTTTGGTTTATT-ATCTGGGGGAG

TTGTATATATT--TCCCAGTACAAACATTTATTAATTATATTGATCAGATTGGAAATAATGGCCTTAA-

---GATTATTTTGAAT--AATAAGAATCTGGTTTTTCATTAGAGATGCAGAAAAATTTTTTATATTGGT

CTTTTTAAGTCTGGTGGCTTGTGAGGGAAGATTGGGTTTAGCAATTTTGGTGAGCATGGTTCGGTTTCA

TGGGAGAGATAAATTTGAGGGAATTTCAACTTTAG

Diplopoda ATGAGTAATGTGGGTTTATTGATGG-TAT-TGGGAGGGCTT

TTAAGTCTAGTA-ATGATTCATAAACATATTATTAGAATATTACTTAGATTGGAGTTCGCTATCTTAG-

---GATTTGTTTTAAT--TATGATTAGTTTAGTATGCTTAGGGTTAAGAAATGGATTGATAGTTGTGAT

TTTTTTAGGGTTTACTGTGTGTGAGGGTGTATTGGGCTTAGGTATTTTAATTAATTTAGTGCGAAATTA

TGGTAGTGATTTTTATTCGAGTGTAAGAGTAATTC

Hexapoda TTGGTTTATTTACTTGTTTATCAATTTAT-TTTTCTGGTGT

TTATGTTTTTTGTTCGAAGCGTAAACATTTATTAGTAGTTTTGTTGAGATTGGAGTATATTGTTCTTTC

TTTATTTATATTAATT--GTTTTATTTCTTGTTGAGTTTGATTATGATTATTT----TTTTCCTGTAAT

TTTTTTAGTTTTTTCTGTTTGTGAGGGTGCTTTGGGTCTTTCTATTTTGGTTTCAATAATTCGTTCTCA

TGGTAATGATTTTTTTAATTCTTTCTTTTTAAGTT

Malacostraca TTTTATTACATTGTTCCTATAGTGAGAGTATTATGTGGTTT

ATGAGTTTTTGTTTCTAAACGTAAACACTTATTAAACACGTTATTGAGTTTGGAGTATATTATACTAAA

CATTTTTTGAATTATA--AGATTACATTTATCTAATATAGGTCATGAAAGTTA----TTTTGTATTATT

TTTTTTAACTTTGGCAGCTTGTGAGGGTGCTTTAGGACTAGCTCTTTTAGTATCTGTAGTCCGTACACA

TGGTAACGATTTCTTTAGAAGATTCAGAGTATTAC

Xiphosura GAGGTGCTTTTAGGAATTTTAGTGT-ATT-TTTTAGGGCTA

ATAAGTTTTTTG-AGAAATCGTAAGCATTTATTATCAATATTGTTAAGATTGGAATTTATAGTTTTAG-

---GTAGATTTTTGTT--AATGGTTCGTTTAGTGGGGGGAAGATTGGGGGAAGAGAGATTTTTATTGTT

TTTTCTTACAATAGTTGTATGCGAGGGCAGATTAGGGTTAAGAATTCTTGTATTAGTGATTCGGTCTCA

TGGTAATGATTATTTTTCAAGAATGAAGTTACTTG

[NAD5 nchar=1736]

Annelida ATTTAATACTAGACTTGTGGCCAGTAAACTAATATGGGTTA

TCTTTACTGGGATGCTGGCGCCCACCCTATACATAGTGCACTGTAATTCCACCTT-ACTTCTAGAGTGA

AATCTT-TTCTCTATTTCCTCTACCCCCATAATAATAACTATTATCCTAGACCCCCTGGGACTGATATT

TTCTTGCACCGTAGTAATAATTTCAGCCAATATTCTAAAATTCTCAACTATCTATATGAAGGAAGATAA

ATTTATCAACCGTTTTACAGTCCTAGTGCTGCTCTTTGTCTTATCTATAAACATACTAATCTTCTTTCC

CCACTTAATTATCCTACTACTTGGTTGAGACGGCTTGGGAATTGTATCCTTTATCCTAGTCATTTACTA

CCAAAATCCAAAATCTTTGGCAGCTGGTATAATCACAGCTCTCACTAATCGTATTGGGGATGTTATACT

CCTCTTGGCTATCGCGTGAACTCTAAACCAGGGTCACTGAAATATTTTACATATGTGGGCNGTCGACGA

AAACA-------TATATCAGGCATTAGT----------TATCATTATCGCAGCTATAACTAAAAGAGCC

CAGATGCCGTTTTCCAGGTGGCTCCCAGCAGCTATAGCTGCACCTACCCCAGTCTCAGCCTTAGTGCAC

TCATCAACCTTAGTTACCGCCGGAGTATTCTTATTAATCCGATTTTATAACTTTCTATCTTC-TGTGTG

ATGATTCACTACCTTTCTACTTTTTGTAGCTGTTAGTACTACTTTAATAGCCGGGTTGAGAGCCTCTTC

TGAATGCGACATAAAAAAAATTATTGCTTTGTCAACCCTTAGACAACTTGGAATAATGATAGCTGCTAT

AGGCTTAGGGATGGCCCATATAGCCTTTTTCCATATAGTAACCCACGCTATATTTAAGGCTCTTCTCTT

TGTGTGCGCCGGAAGATTTATTCACAGACATATGCACAGTCAAGATCTTCGTTGAATAGGTAATCTCAC

TAAACAAATACCTACTACCACCTCATGCTTAATTATAGCAAATCTAGCTCTTTGTGGGTTCCCCTTTAT

GTCAGGTTTTTACTCTAAGGATATAATTGTGGAAGCTTCGCTCTACTACCCCCATAACTCACTTATAAT

TAATCTAATCTTATTTGCAGTCGGTTTAACTGCATTCTACTCAACTCGATTTACCATGTGCGTAGTCCT

TTCTCCCAATAACTGTGGTCCTTATATACATTT---GGAGGAGAGCAACTCCCTCACATCTCCTATACT

GCTTCTAGCTTCAATATCAGTTATTTCCGGGTCAGCTCTTACATGAATTCTGCCGTTAAAACAA-GAAA

TAATGATAATCCCCCTTGACCAAAAGCTTAAAACCTTAATAT--TAGTCACTTTGGGTGCACTTATATC

CTG-GTTCTTTCTAACAACGACAAATATAACTAAAACA-TGCCTATACATTCGTCACCCAATTATTAAC

TACTTCTCATGCACTATGTGGTTTCTAGTCCCCCTTTCATCTCAATTTATAATAAAACTCCCAATATAT

GTATCACACAACTACTTAAAACTGACCGATCAGTCATGGTTGGAGTTACTCGGGGGGCAAGGTATTAAT

AACGTATCA--AGTAAAGCCTCCAATATCTATCTGGCATCCTTAAAATCTACACCTATGAACTACCTAA

TAATGTCGTCGATACTACTACTAGTCGCCACCTTAGTCG

Arachnida ATTTTTTTAAAATGAGGTTATTATTTATTAATAAATAG--A

ATTATGTTTTTTTTTTTTTTTGTTTAT-----ATAATTTATATGTATGAAGTCGTTGTA-ATTGAAATT

TATTTA-ATAAATTTATTATCTTTAGATGTAAAAGTATATTTTTTATTAGATTGAATTAGATTAAGATT

TATATTTGTAGTTATATTTATCTCTGCTATAGTAATTATTTATAGGCATGAATATATAAGAGGGGAAAG

AGAAAAAAATTATTTTTGTTACATAGTTTTATTATTTGTGTTTTCTATATTATTGTTAATTGTCTCCCC

TAATATAATAATAATTATTTTAGGTTGAGATGGACTTGGGTTAGTATCTTATTGTTTAGTGGTTTTTTA

TCAAAGAACTAATTCATATAATTCTGGTATAATTACTGTTTTAATAAATCGGGTTGGGGATGTAACACT

TATTATATCAGTAATTTTCTTACTTAATTATGGGAGACTAGAT---ATTAAC-AGAGTTAAAG--AAAT

AATTA------AAGTATGTGGAATT-----------TTAGTTATAATTTCAGGAATAACAAAAAGAGCA

CAAATCCCTTTTTCTGCGTGATTACCGGCAGCTATAGCTGCA---ACTCCTGTTTCTTCTTTGGTTCAT

TCTTCTACTTTAGTCACTGCGGGAATTTATCTTTTAATTCGTTTTAGAATTCTTTTTGAAA--TAAAGT

TTTATTCAAGA-ATTATAATAGTT-TTGTCAAGAATAACTATATTTATAGCGGGGGTGGGGGCAAATTT

AGAATTAGATTTTAAAAAAATTATTGCTTTTTCTACTTTAAGTCAATTAGGAATAATTATACTAATTTT

ATCGTTAGGAAAAATGGAATTGGCGTTTTTTCATTTATTAATACATGCATTATTTAAATCTATGTTATT

TTTATGTGCTGGGTTAGTAATTCACACTTTTTCTGGGATTCAAGATGTTCGATATTTAGGAGGATTTTT

TAGCTTTAGACCTTTAATTAGGGGTTGTATAGGATTAGCTAGATTATCTCTTTTTGGTTTTCCTTTCGT

GGGTGGATTTTATTCTAAAGATTTAATTTTAGAATTTATTTACATGAATGTAAATAATATTTTTATTAT

TATAATTGTTATTGCAAGTACATCATTAACAATAATTTATTCTATACGAATAATGTATTATATTGTTTG

AAAGGGAATTTTTATTCAAAGTTT---TTTTTTAAAAAGTTCTAATTTTTTTATATTGTTTCCAATTTA

TTTTTTAAGTTTTATAGTAATTGTTTTTGGAAATTTATTTAGTTGAATTAGATTATCTAATGAA-GATT

T-ATTAATTTTATCAAATTTTAGAAAGTTTT----TTAATTTAATTTTAATTTTAATTTCTTTT-----

---TATTTTTTTTATTTAATGTTTATAATAAAAATA---GAAGGATATATAATAAAAAATATTTATTAT

---TTTTTTAGAAGAATATGATTTTTATCTGTCTTATCAAG-AATAGTTTTATTAAAATATTTTAAAAA

ATATAGGATTACTTCAGAAAA-----CGATTGAAAATGAGTGGAAGAAATAGGCCCTGGGGGCATTTAC

--AATTTTATTA---AAAAAAATAGTTATTTTTCAACTTGATTAAGAAATAATTTTTTGAGATCTATAG

TT-CTATTATATACAAGAATGTTAATC--ATATATATGT

Branchiopoda GGATAAGTATCTTTACCAAAAAATTTCTTTTTTCCTGGTTA

ACCTCATATTTATTGCCGGGTTCACAGGGGTCTTTTTGAGTTCTGAGGGGACGTCAATTTTCTTTGAGT

GATTTT--TAGGGGGGAGAAGAGTTAACTTTAGAATAATTTTTCTTTTAGATAGAATGAGTTGTTTTTT

TCTTGCTGTGGTTTTGTGTATTTCTGGTAATGTAGTCTGATACAGTAAAAGTTACATGGCTTTAGACCC

TAATGCCAATCGGTTCATCCTCTTAGTTTTAGGTTTTGTTGCTTCTATGGCTATCTTAATTCTAAGTCC

TAATATCTTAAGAATCCTACTAGGATGGGATGGGTTGGGGCTAATTTCTTACGGTCTAGTAATTTATTA

TCCTTCTAAAAAGTCAAGTAGCGCGGGTATAATCACAGTCTTATCTAACCGGGTGGGGGATGTGTGCAT

CTTACTCTCAATCGCTTGATTCGTATCAGTAGGAGATTTTAATTTTAGAATT-TGGGCCTTTTATAATA

ATGTAGAGTTTAGAAATTGGGTCCCTCT-------TCTTGTATTACTGGCCGCTATAACTAAAAGAGCT

CAAATTCCCTTCTCTGCTTGATTACCTGCTGCGATAGCGGCTCCAACCCCAGTTTCTGCTTTGGTACAC

TCCTCTACTTTAGTCACTGCTGGGGTGTATCTATTAATTCGTTTCTCTTTTATCTTAGGAG-----AAA

CTTGTTCAGCA--CTGTTACTATTTATTTCTATTATAACCATGTTCATGTCGGGGGTTGTAGCTATCTT

TGAGTATGATCTTAAAAAAATTATTGCATTGTCTACCCTTAGACAGTTAGGGATGATAATGTTCTCCAT

TTCTTTGGGCCTCTACGAGTTGGCCTTCTTCCATTTATTAACACATGCTCTATTTAAGGCCCTGCTTTT

TCTTTGTGCAGGGATTCTTATTCACGGGGCCGGGAATACCCAGGATATTCGATCTTTTGGGGGGCTTAG

CTTGAATTTTCCGTTGGTTACGGTGTGCATAAATCTAGCTAATTTATCTCTTTGTGGGGTGCCTTTCTT

AGCGGGGTTTTACTCTAAGGATTTAATTGTAGAGCTTGCTTGTCAATATTCTTGGGGAATTTTTGTCTT

ACTTATGATATTTATTTGTCTCAGATTAACAGTTCTTTACTCAGTTCGGCTTACTTACTTAAGTTTTGT

TGGCCCATACGGGGGGGGAACTTCGATTTCTGTTTGCGAGTCGGATTATTCGTTAGTTGGGCCGGTGGT

GATTCTTTCTTTTACTTCCCTTGTTTCAGGCCCAATCTTGAGATGGCTTAATTTCCCCGCCCCG-GTTC

TGATT-TTCTTGCCTGTATTTTTAAAGTGG-----GGGGCTCTCTTTTTTGTTGGTGTTTCCCTGCTGG

TGATACTAAGTTTACAGGGGTTAACCTACTCT-------------TATAAATGGGGGGCAGTTAGGAAG

---TTTAGAGGTTTAATATGGTTTCTTCCTTGACTGACAGGCCAAGGTTTTTCAATGAAAACTTTAAAG

AATGCGGACCACCTCTTAAAGATTTATGACCAAGGTTGATTGGAGTTTTATTCAAGAAAAGGCTTGGAA

GTTGTAGGGGGGAAGGTTAACACACTCAATTTAAA--ATTTCAGCATAGTAGTTTGAAGCTCCACTTTC

TAATTTTTTTACTTTGACTTTTCTTATGTTTTATTTATA

Chilopoda ATTTATGTAAAGTTAGAAGA--TATTGATTGATATTAATTA

GAGTTGTAAGATTTCCTGTAGGTATCT---GAATAGGGT-CGGTGGATTATTCTTTGTATCTAGAGTGA

TGGGTA-ACATCCCTTAGAAGTTGTAATATTGTAATAGCGGTAGTTGTAGATTGAGTGGCTTTGATTTT

TTTTTCTTTTGTTTTTTTTATCTCTTCTAATGTAATATATTATAGCGTAGATTACATGCATTCAGATAG

GGAAGTTATTCGGTTTGCTTGATTAGTCCTATTGTTTGTTATTTCTATAATATTATTGATTTTTAGCCC

TAATTTTATTAGAATTCTTTTAGGGTGGGATGGTCTTGGTTTAGTCTCTTATTGTTTAGTTATTTATTA

TCAAAATGTGCGGTCCTTTAGAGCGGGAATGATTACTGTTTTATCTAACCGGATTGGGGATGTATTTAT

TTTGTTGGGAATTTCTCTTATGGTTTCTTGAGGGGGATGAAATATTTTGAGT-TTTGGTTTAACTGGAC

CTATTTTTTGTTGAAGTTGAGTAGTTTT-------TTTTAGTCTTATTGCTGCAATAACAAGGAGAGCA

CAAATTCCATTTTCTGCTTGACTTCCTGCTGCTATGGCGGCTCCCACTCCTGTGTCCGCCTTAGTACAT

TCTTCGACATTGGTTACTGCTGGGGTATATCTAATAATTCGATTTAATACAATACTTTTATCGAGAACT

TTTTTTTCTAA-TGTATTGTTGGTATTATCAACCCTAACTATGTTTATGGCGGGAATTTGCGCAAACTT

TGAGACCGATCTTAAGAAGGTGGTAGCTCTGTCTACTCTAAGCCAGTTGGGTCTTATAATAATATCCTT

GTCTATAGGGTATGTAATGCTCGCTTATTTTCATTTGTTAACTCATGCTTTGTTTAAGGCTCTATTATT

TATGTGTGCAGGGGCGGTTATTCATGCTAGAGGGGAAAGACAAGATATTCGATTGATGGGGGGTTTAAC

TTTTTACATACCTGTTGTTTGTGTAAGAATGAATATTGCTAATCTTGCTTTATGTGGTTTCCCTTTTTT

AGCAGGATTTTATTCTAAGGATATTATAGTGGAGGTTTCTTTGGGGGGGGTAGAAAATCTTATAATTGT

TGTGTTGCTCATATTGTCTGTAGGTTTAACTGCTTTTTACTCTTTTCGGCTTAGTTTTTATTCTATATG

AGGGAGAAGACGGAT---GAGTTTTGGGGGAGTAATAGATGGAGGGGGTTATATAAATAAGGGAATTAT

TCTTTTGGGAAGTTTTGCTATTTTTGGGGGAAGATATTTATCATGATTATTATTGCCTGTATGT-TCCG

TGAGAGTAGTTGGAATAATAGATAAAATAATGATTTTGATTATGGTTGGATTAGGAATCTATTTAGGA-

----ATGATAATTAATTGAAATGATTATGG------------------GATTATTCGGTATTTTGGCAC

A--ATGTTTGGGGGCATATGATTTCTTCCTTATATTAGTGGGCAGGTTAGTGGGTTATTTTTTGTAAAG

CTCGGAAAGTTGTCTTTTAAGGTTAATGATTATGGGTGAGGGGAGTGTGTAGGGGGGGAGGGGGCTTAT

AGAACTTTAACTATTTTTAGTTCTATAA--ATCAACAAGTTCAAACTAATAGTTTAAAGATTTATTTAG

CCTCTTTTTTATTATTGGTCGGGTTTGGGTTTGGGGTTT

Diplopoda AGCTATGGGCAATGTGTGAGGAGTATTATTAAGAGTAGTTA

GTTTAATCTGTTTTTGTGCTGGATTATTTACATTATTGTATGATACAAGAGTGGTAATTTATTGAAGAT

TAGTGGGATTCAGAGGAATAGATATG--AGTGTGGTTGTCTTA---TTTGATTATATGTCTTTAATTTT

TTGTGGGGCCGTGTTATTTATTACTAGAGCCGTTGTGCGATATAGTGAGTTTTATATAGGGTTGGAAAA

GAATAAGGCACGATTTTTCTATTTAGTCCTTCTGTTTGTAGGATCAATGTTACTAGTAATTTTAAGTCC

TAGTTTTTTGAGTTTATTATTAGGGTGAGATGGGTTGGGGTTAGTTTCTTACTGTTTAGTAATTTATTA

TCAGAATAGAAAATCTTATAGTGCAGGGTTTTTAACGATTATAAGAAATCGTTTAGGCGATGTTGGACT

TTTATTAGCTATTGGGGGATTAATAGGGTATGGGAGATGAAGTT-TTTATGG-GATGTGATTT-----G

ATTT---------GTATTGATGAATTGT----TTGATGTGTTTTACTGGCTGGAATGACTAAAAGTGCT

CAGGTTCCCTTTGCGGCGTGATTGCCAGCAGCCATGGCTGCTCCCACCCCAGTTTCTGCACTTGTTCAT

TCTTCTACTTTGGTTACAGCAGGTGTGTATTTGCTAATTCGGTTTACTTGGTTTGTTGGGGCCTCAGGG

GATTTTATAGTTGTTGTTATATATATTGGGCT-TGTGACTATAGGGTTAGCCGGGTGGGCAGCCATTTT

TGAGACCGATCTTAAAAGGGTAATTGCCCTGTCAACTTTGAGTCAACTTGGTTTGATGATAGCTGTAGT

AGGGGTGGGAAATTTTGGTTTAGCTTTTTTTCATTTAATTACTCATGCAATGTTTAAGGCTCTTCTTTT

TTTAGGTGCAGGGAAAGTGATTCATAGAATAGGGGGAAATCAAGATCTTCGATTAATGGGGGGAATTGT

TGAGGGGCTTCCTTTAACTAGCGCTATAATAGGGTTGGCTAGATTAGCATTATGTGGGTTTCCTTTTTT

AGCGGGATTTTACTCTAGGGATTTAATTTTGGATTTTATAATAGTAGGTTATTTAGGGTGGTTTGGTGT

AAGCTTATTAATTGTGGGCACTGTTTTTACCTGATTATACTCTGTTCGGTTGATTTGAGTTATAATAGG

GGGGTGATGATCTAATAGAGTTGTTAGTAATTTAACGGATAATGATACTGGATATACGTCTCCCATAGG

GGCTCTGACGGTCGGGGCTTTAGTAAGAGGGGCTAGATTATCTTGGGCGATTTTACCCTTACCTAGAAC

TAATGTGTTTTACAGTGAGGT-TAGGTTGGTTCCGGTAGTCC--TTGTTTTTCTGGGTTTATTTGGGGG

ATATATCCTGAGATATAGCTATGTGAGAGA---------AACA---ACGAGGGAGTCTTATATTCTAGG

G--GTCAGAAGAGGTTTAATGGGATTATTTTTTATCTCGGGGGCTGTTTTAACGGCTAAGCCGCTACGG

GTGGGGGAAAGAATTGTTACATTAATAGATCAGGGGTGAGGGGAAATTTTTGGGGGACAGGGGGCATAT

-AGGATATGG-AGTTTATTAAGTTATTATTTTCAGTGGATTCAGGAGAATACTATTAAAGTGATTTTGA

TAGTAGGCCTTGGTTGAGTTATATTATTTGTTCTTGTGT

Hexapoda TGTTCATTGAGTTTTTTTT---TTTTATTTTTGTTTAG--A

ACTTTATTTTTTATTTTAGGTATTTAT------TACTTAATGATTGATTATAGATTGTTTATTGAGTGA

GAATTA-TTTAGTTTAAATAGTTCTATGGTAGTAATAACTTTCATTATTGATTGAATGTCTTTAGTTTT

TATATCTTTTGTTATATACATTTCTTCTTTAGTTATTTATTATAGAAATGATTATATACATAATGAAAA

GAATATTAATCGTTTTATTATGATCGTTTTAATATTCATTTTGTCTATAGCATTCTTAATTATTAGTCC

AAATTTAATTAGAATTTTATTAGGTTGAGATGGATTAGGTTTAGTATCTTATTGTTTAGTTATTTATTA

TCAAAATGTGAAGTCTTATAATGCTGGGATATTAACTGCTTTATCAAATCGTATTGGTGATGTTGCTAT

TTTGATTTCTATTTCTTGAATATTAAATTTTGGTAGTTGAAATTATATTTAT-TATTATTATT--TTAT

TTCTGATTCTTTTGAAATAAAAATTATTACTTTA--TTAATTATTCTTGCTGCTATAACTAAGAGAGCA

CAAATTCCTTTTTCTTCTTGACTTCCTGCTGCCATGGCTGCGCCTACTCCTGTTTCTGCTTTAGTTCAT

TCTTCTACTCTTGTTACTGCTGGTGTTTATTTATTAATTCGTTTTAATCCAATATTAATGG--TTTATG

ATTTTGGTTGA-TATATTCTTTTTATTGGTTG-TTTAACTATATTTATGTCTGGTCTTGGAGCTAATTT

TGAATTTGATTTAAAGAAAATTATTGCTCTTTCTACTTTAAGTCAACTTGGTTTAATAATAAGAATTTT

ATCAATGGGTTATTCAGATCTTGCTTTTTTTCATTTATTAACTCATGCTTTATTTAAGGCTTTATTATT

CATGTGTGCAGGCTCTATAATTCATAATTTGCGAGATTCTCAGGATATTCGTTTTATGGGTTCAATTAT

TCATTTTATGCCTTTAACTTCTATTTGTTTTAATGTTTCTAGATTATGTTTATGTGGTATACCTTTTTT

AGCTGGGTTTTATTCTAAGGATTTAATTCTTGAAATTGTTTGTTTAAGTTGAGTTAATTTTTTTATTTT

TTTTCTATATTTTTTTTCTACTGGTTTAACAGCTTCTTATTCTTTTCGTTTATTTTATTATTCAATATC

TGGTGATAATAATTATTATTCTTCTTATTCTTTTAATGATAGTAGCTACTTTATTTCTTTTGGTATAAT

TGGATTACTTATTGTTGCTGTCTTTGGTGGAAGACTTTTATCTTGATTAATTTTTCCTGTTCCT-TACT

TGGTT-GTTTTACCTTGATATTTAAAGTTTTTAACTTTATTA-ACTATTATTTTAGGGTCTTATTTTGG

TTATGTTATTTCTGATTTTGTTTATTCTTATGAATT---GTTTTCGTTGAATTTTTTATCTTTCGTTAT

A--TTTACTGGTTCAATGTGATTTATACCTTTTCTTTCAACTAATTATGTTAGATATTTACCTTTAAGA

TTTGGTTATTATTCTTTAAAGTCTTTTGATTCTGGTTGAGGTGAGTTGCTTGGTGGTCAAGGTTTATAT

--TCCTTTTTTGTTTATTTAATTAATTACATTCAGTCTTTGTATGATTCTAATTTTAAGGTTTATTTAT

TAACTTTTGTTTTTTGAATATTTATTTT-ATTTGTATTG

Malacostraca GTTTCTTTATATTTGTCAAGAATATTATTTCTTTTTAG--A

GGTTGCTCGGTTTGTTTAGTACTTTCTCTAATGTGTTTAGAAAGAGGACAAGCTTGATTTATTGAATGA

GAATTA-TTAACTTTAAATTCTAGCTCTGTTGTTATAACTTTAATTTTAGATTGAATATCTTTTATATT

CTTAAGTTTTGTAATATTTATTTCTTCTATAGTATTATATTTTAGAGGAGAATATATGTCTGGTGATAA

TAATATAAATCGATTTATATACCTAGTATTAGCTTTTGTTATATCTATAGGTTTCTTAATTATTAGTCC

TAATTTAATTAGAATTCTTCTAGGGTGAGATGGTCTAAGACTAGTTTCATATGTCTTGGTTATTTATTA

TCAAAATGAAAAATCAGCTAATGCTGGTATATTAACTGCTCTTTCTAATCGAGTAGGAGATGTAGCCAT

TTTATTATCCATTTCTTTATTTTTTAGTTACGGTGGGTGAAATTTCTTATTT-TATGTAGAGA--ATAT

ATCCA--TGTTAAATATTGATAATCTTTTATGTAGATTAGTAATTCTAGCTGCTATAACAAAGAGAGCA

CAAATTCCTTTTTCAGCTTGATTACCTGCAGCTATAGCAGCTCCTACTCCTGTTTCTGCTTTAGTTCAT

TCATCTACTTTAGTTACAGCCGGAGTATATCTATTAATTCGTTTTAGCCCCGCTTTAGAAG--GGCGTT

TATGTCAAAGA--ATATTATTATTATTGTCAGGTTTAACTATATTTATAGCTGGTCTAGGAGCTAACTT

TGAGTATGATTTAAAAAAAATTATTGCTTTATCTACCTTAAGTCAATTGGGTTTTATAATAAGAATTTT

ATCGTTAGGTTATGCAGATCTTGCCTTCTTTCATTTATTAGCACATGCTTTATTCAAAGCTCTTTTATT

TATATGTGCAGGTTCAGTAATTCATAGTGTTAAAGAATATCAAGATATTCGGATAATAGGAGGGTTAGT

TTATCATATACCTTTAACTAGTATATACATAAACTTATCTAATTTAGCTTTATGTGGTATTCCTTTTTT

GGCTGGTTTTTATTCTAAAGATATAATTTTAGAAGTAGCTTTTATATCTACTATTAATATATTCTCTTT

CCTTTTATATGCTTTAGCTACGGGTTTAACAGTCTGCTATACAATACGTTTAGTTTATTATACTTTGTC

AGGTGATTTCAACCTAGGAAATTTATATTCTATTAGTGATGAAGGTAAAATTATAACTAATCCTATGTT

TGGTTTAGGAGTAGGAGCTATTTTTGGTGGAGCAAGATTGGCTTGATTAATTTTTCCTTTCCCT-TATA

TGATTTGTATAAGACCTTTTTTTAAAATATTAGCATTGATTGTAATATCAATTGGAGGTATGTTAGGAT

ATATATTAAATTTAAATACTGTTAAT--TACCAACT---CAATTCTTTAAACGCTTATAGCTTTGTTGT

A--TTCTCTGGATCTATATGATTTATACCTTTTTTATCTACTTATATAATTAGAAAAAAATTTTTAGAG

GGTGGAAGAAAATATCAAAAAGTTGGTGATATAGGATGATCTGAATATTATGGGGGTCAAGGTATTTAC

--ACTTCTATTATATTATCTTCCAAAAGTTTACAGTTTTTACAGGATAATAACATAAAAATCTATATAT

TAAGCTTTTTACTTTGGGTTATTGTTCTGATATTTATGG

Xiphosura ATCTGTTTATGGATTATGGGCTTTGTTTTTGTTGTTGATGT

TTGTAATATTTTTCTCTTTTTCTTTGTTTTTTATTTTTTCTGATTTTGCTGTG----TTTGTTGAATAT

TATTTATTTTCC-ATAAATGGATGTCCTGTTGAGTTTATAATGGTTTTTGACTGAGTATCTCTAATATT

TTTATCTTTTGTTATGTTAATTTCTTCGGTGGTGATTTTTTATAGAGAAGAATATATAGAGGGAGATGA

AAATTTAAATCGGTTTTGTTATCTTGTTTTGTTGTTTGTATTATCAATAGGGTTATTAATTTTGAGACC

GAATTTGATTTCAATTTTGTTAGGCTGAGATGGGTTGGGATTAGTATCGTATTGTTTGGTGATTTATTA

TCAAAATAATCGGTCTTTAAATGCAGGAATAATTACTGTTTTATCTAATCGTATTGGTGATGTGGGAAT

TTTAATTGGAATTGTTTGGATATTAAATTTTGGAAATTGAAATTATTTTTCT-TATGTACTTTTAGAAG

ATATAGGGAGGGAGTTTTATTGGGTAGG----AGGTTGTGTAGTCTTGGCGGCTTTAACCAAAAGAGCA

CAGATTCCTTTCTCTGCTTGACTTCCGGCAGCTATAGCTGCCCCTACTCCAGTTTCCGCTTTAGTTCAT

TCTTCAACTTTAGTGACTGCTGGTGTTTATCTTTTAATTCGGCTAAGACAATATTTTAGAG--TGGGAG

TGTTTTCTTGT-GTTTTAATGTTTATTTCTTG-TATAACAATATTTATATCTGGATTGGGGGCAAATTA

TGAGATAGATATAAAAAAGGTAATTGCTTTATCAACTTTAAGACAATTAGGAGTAATAATATTATCAAT

TTCTTTTGGGTATTGAAAGTTAGCTTATTTTCATATGCTTACTCATGCCTTGTTTAAGGCCCTTCTCTT

TCTTTGTGCAGGGTCTGTAATTCATAGAAGAGGTGGGGCTCAGGATTTACGATATATGGGAGGAATAAT

TGAGTTTAGACCTGTGGTTGGATCTTGTTTTAATCTTGCTAATTTATCTTTGTGTGGAATTCCTTTTTT

GGCTGGTTTTTATTCTAAGGATTTAATTTTGGAAAATGTATCTTTTTTTAATTTTAATTTTTTTATTTT

TATTTTTTTTAGAGTTTCTATTGGGTTGACTGCTTGTTATTCTTTTCGATTGTTTTT--TTATATTATG

GGA-CGAAATTTCTTTATGTTTTTTAGAAATTTCGGGGAAGGGAGGATCGTTAGTGTTTCTATTATTT-

--TTTTATCTTTTTGGGCTGTTATTATAGGGTCTACTTTAATGTGGATTTTGTTTCCTATTCCTTGCTT

TG-TGTTTGTTCCAATTTTTTATAGGGTTATAGGGGTTTTAT--GTGTAATTGTGGGATTATGAATAGG

ATTAATTTTGTGAGGAGTTAGTGGAAGATATTTATTTTTAACAGGGAAGAGAGTGAATCACTTTTTAGG

G--TTAATGTGATTTTTACCTTGATTATCTTCAAATCC------TCTTTTATC---TAAATTA----AG

ATTAGGGGGTTATTTTTTGAG--AAGTGATTTAAGGTGAGGAGAGTGAATAGGACCCCAAGGTGTTTTT

GAAGGGATAGTAATTGGTTCTAGGATT--TTTCAGTGATTTCAGGATAATAATTTAAAGATGTATTTGG

TGTCTTTTGCAATTTGAGTAATTATTTTTACTTTTTTGA

[NAD6 nchar=507]

Annelida TTCATATTAATGATAATCGCCACAACTTTTACCCTATATCTA

GCTTCCACCCCTATTGTCTTAGGTGTAAATATTCTCATAATAGCCCTACTCTTAGCCTCCACATTTGCG

TCCTTTATAAG---CTCCTGATTTGCATTTTTAATTTTTCTAATCTACATCGGCGGCATGTTAGTCATA

TTTGCCTACTTTCTAGCTTTAACCCCCAACCAAC-----AAATTTCAAACTTCA----ATATTATACCA

TATGCTCTAATCACATTATTAACATTTTCGGCA-CTAACATACACCA--CC---AACATTAAAATCCCC

ACTTTTTCTGATA---TTAGTCAAG---GAAACTCAATTTTG--TAT-------------ATATCCAGA

ACTGCACCATTCCTC---------------ATCCTTCTCGCCCTAATCCTCCTCCTTACGATAGTTATT

GTAGT---AAAATTAACCAGACGGTCAAGGGGCCCTCTCCGCCCATTCTCC

Arachnida ATAAAATTTATAACTTTTTTAACAA---TAATTTTTTTTATT

TTTAATCACCCTATATATATATTAATATCAATTATTTTTATTACTTTATTAATAAGAATTTTAATTTAT

ATAAGAATAAAAATATTATGAGTCTCTCTTATTTTAATTCTTCTTATCTTGGGGGGAATACTAATTTTA

TTTCTTTATATTATTAGACTAATCCCCAATAAAA-----AACT-----ATATTT----TAACAAAAA--

-----AATTACAATACTTTTAACTTTTTTGTTA-TTATCATTTCCTT---------CTTTTAAAATATC

CGAAATTTCTTTT---TTTTACATA-----AATTCTA--------AT-------------TTTTTTCCC

TCTTC-TATAAATATA--------------ATAACATTCATAATAATTTATTTAATTATAACATTAATT

GTAGTAATAAAAATTATAACTTCATCTAATGCTCCTCTTTCAACTTTGTAA

Branchiopoda TTCTTACTGG-GACAGTCTTTATAGTATTTATATTCCCCTTA

GTCAGACACCCCCTCCTCATAGGGCTAATTATCCTTATTATTACTTTTATAATCGCTGCAACATTAGGG

CTTGGGGGGCTAAGATCTTGACTCTCTTACGTCTTAGTATTAATTTTGTTGGGGGGGTTACTTGTTATT

TTTATTTACATCTCACTCCTTGCTTCCAATGAAAATCAGACACCCCAAAGTAATA---AAATTAAAATA

TTTTTTTTAAGTACCACATCAATTTTAGCGGGCTCTCTTGTAATTTCTTCCAGACTAAAAGTATTTGAC

TCTAAAACCAATGCCCTTTTAAAAATAACCCACTACAACAATGAAAG------TACAGACTGATTAAAT

TTACTGTACTCCGAACAATTAGGCGGAATGACTATTTTCCTTGTCCTTTACCTCTTACTCACTCTTATT

GTAGTAGTGGCTATCAGCAAGAACGATTCCTCTTCTCTGCGAGCCCTTTAA

Chilopoda TTAATATTAACAATATCCTTAATTA---TTACAATAACCTAC

ATTTCCCACCCTATCACTTTAATTTTCTCATTAATTATTTATACCCTACTTATTGCCATAATAACTTCA

AGCATATACTCTATATTTTGATACGGGTATATTTTAATTCTTGTCTTCCTGGGGGGAATATTAATCCTC

TTTTTGTACGTCGCCTCAATTGCACCAAATGAAA-----TATTTCCTAGTATCC----CAATTAAAATA

ATCTCTATATCACTTGCTTTAATTATTCCCCTC-ACCCTTTATTTAAATAA---AACATCAAGTTTAAT

TCTTTGAAACACG---GGGGAAGTATTCAACTCCTTAATTAAATTAT-------------ATAACCAAA

ACTGTATGCTAATACT--------------AT--TTATTGTTATATATCTCCTAATTACCCTCCTAATT

GTAGTT--AAAATTACTAAC--TTCTTCAAAGGCCCCTT--ACGATCTTTA

Diplopoda CTCCTACTAATTTTACCATTAAGAA---TTATCTTACTCCAA

CTCCACCATCCACTAAGCTTAGCTTTGACAGTAATCTTCACAGCCTTACTCTCCGCAATCAGAATTCTT

ATATTAACACGAGCCTCATGATTCAGCTATATTTTATTTCTTATCTTTATCGGAGGCATCCTAATCCTC

TTCACTTATATTGCAAGCCTAGCACCCAACTCAA-----AAAC----AGTA--------AATCCCTATA

TTCTTCCTATTCCCT-TACTAAGTACTGCTCTC-CTATTTTCTTTCAGCCC---AACATCTTACTTCTC

CTTTTCCCAACCA---ATGCTCACATTCAAAACCCTGTTT---------------------TCCCTGAC

ACTTTCTCCTACGACA--------------ATCATTCTAACTATATTTTTATTAATTACACTCCTAGTA

ATTGC---ACAACTAGTAAAGATACCAGAAGGGCCGCTTCAAAGATCAATA

Hexapoda AGATCATCAA-ACTTAATAAACA-----TTAATTTTATAAAA

ATAAACCATCCAATATCCATTATAATAACCATTATTATTCAAACCTTATTTATTAGAATAATAACAGGA

ACAATAATAGAAAGATTTTGACTATCATACATTTTATTATTAACATTCCTAGGTGGTATAATAGTCTTA

TTCATTTACATTACAAGAATTGCATCAAATGAAATATTTAAAATTAAAATCAATAGAATCATTATTATT

GTTTACATAATAATTATTTTATCAACATTAATATACAAGCTTGATAAAACA-ATTTCAACAGAAATAAT

TAAAAACTCAGAA--ATTATAAATCTAAACTACTCAATTAATTTCAAAGAAATATCAACCTCACTAGTA

AAATTATATAATAACCCAACAGTTATTATTACAATTATAATAATAATTTATCTATTTATTACATTATTA

GCAGTAGTAAAAATCACAAACATTAACCAAGGACCTATACG--TAAAATAA

Malacostraca TTTTCACCAATAATTATTATTTCATCTTTTATTTTTACACGT

TTACTTCATCCCTTAGCTATAGGGCTTATATTACTAATTCAAACTGTAATAATCTGTGTTACAGCTGGT

TTATCAATAAATTCTTTTTGGTTTTCCTATATTTTATTTATTATTTTCCTAGGAGCAATATTAGTTCTA

TTTATTTATGTAGCATCCTTAGCTTCTAATGAATCCTTTAGATTTTCTACCTCT----TTACTTTTAGT

ATTTA--TAATAACAGCTTCAGTAAGATTCCTA-ATAGTATTTATAGATCCTATATTAGTAAATACTCC

TCTTTCCCTACAACAATCATCACTGATTAATGACCAGTTTTCTTCAA-----CCCCTATATTATTAAGA

TCTATTTATAATTATACTACTATAAACCTCACTTTATTTATTGTATTATATTTGTTATTAACATTAATC

GTAGTAGTAAAAATTACTAACACTTTTTTTGGTCCTTTACGACTATCCTCA

Xiphosura ATCCTATCCACAATCTACTCCTCAG---TTTTATTTCTCATT

TCCTATCACCCTATCATAATAATTATAAACCTAATCCTAACCACAATTCTTGTTAGCTTAATAACAACA

CTCCTAATAAAAACCTCTTGGTTCTCCTACACTCTATTTCTCATTATACTAGGGGGAATACTAGTGGTA

TTCATTTACATTGCAAGATTAGCCCCAAACGAAT-----CTTTC---AAAATAT----TAACAAAAATC

CCCTTACTAATCATCCTCTCAATACCACTTTTA-TTCACCACAATTT---------CATTTAAAACCTC

TATTTATCCAGAA---ATATATAAA-----ATTTCCATTTCAAAAAT-------------TTTCTCCAA

TCTTCCTATATTAACA--------------ACTCTTTTTTTAGTAACCTTTCTACTAATTACTCTTATT

GCTGTAGTGAAAATTACAAAAATCTCCCAAGGCCCAATTCGACACAATTAA

;

end;

Begin sets;

charset Nuclear_GENES=1-8194;

charset Mitochondrial_GENES=8195-21313;

charset ef1=1-1092;

charset ef2=1093-2998;

charset su2=2999-3131;

charset 18s=3132-5024;

charset 28s=5025-5319;

charset eno=5320-6427;

charset g3pdh=6428-7316;

charset h3=7317-7612;

charset rnaPolII=7613-8194;

charset 12s=8195-9036;

charset 16s=9037-10349;

charset atpase6=10350-10844;

charset atpase8=10845-11008;

charset CO1=11009-12542;

charset CO2=12543-13221;

charset CO3=13222-14002;

charset CytB=14003-15087;

charset NAD1=15088-16028;

charset NAD2=16029-17056;

charset NAD3=17057-17412;

charset NAD4=17413-18787;

charset NAD4l=18788-19070;

charset NAD5=19071-20806;

charset NAD6=20807-21313;

end;

begin assumptions;

usertype mymatrix (stepmatrix)=4

G C T A

. 2 2 1

2 . 1 2

2 1 . 2

1 2 2 .;

typeset mytipe=mymatrix: 1-21313;

[This defines the stepmatrix for the weighted parsimony analyses.

To run weighted parsimony analyses issue the command: "ctype mymatrix:all" from the command line]

end;

Begin PAUP;

outgroup annelida;

[MODELS LIKELIHOOD ANALYSES. The first to be used in all gene analyses. The second to be used for nuclear gene analyses]

[

[!

Likelihood settings from best-fit model (GTR+I+G) selected by hLRT in Modeltest Version 3.06

ALL GENES ]

Lset Base=(0.2887 0.1940 0.1887) Nst=6 Rmat=(1.4612 3.3040 2.4153 1.1898 4.4317) Rates=gamma Shape=1.8581 Pinvar=0.2973;

[!

Likelihood settings from best-fit model (TrN+I+G) selected by hLRT in Modeltest Version 3.06

ALL and ONLY NUCLEAR GENES]

Lset Base=(0.2829 0.2360 0.2383) Nst=6 Rmat=(1.0000 2.2633 1.0000 1.0000 4.4908) Rates=gamma Shape=1.1195 Pinvar=0.4005;

]

end;

# Fossil Calibration Points

Two fossil calibration points have been used in this study. The first is the Diplopoda-Chilopoda split and the second is the Xiphosura-Arachnida split. Regarding the Chilopoda-Diplopoda split, we follow Almond [1] and Shear and Selden [2] in considering the unnamed fossil BM(NH).In43574 to be the oldest representative of the Chilopoda-Diplopoda group. BM(NH).In43574 was recovered from the Stonehaven Group (Scotland) which is regarded to have a Wenlock-Ludlow boundary age [3], which is 423 Ma according to the 2002 update of the International Stratigraphic Chart (ISC).

Although different authors have suggested that a variety of fossil taxa belong to Chelicerata, most of these taxa, e.g. the Cambrian *Eolimulus*, are of dubious affinities [4]. Here, we followed Dunlop and Selden [4] in considering Chasmataspidae, Eurypterida and possibly the problematic *Lemoneites* as the oldest known Chelicerata. All three taxa are known down to the lower-middle Ordovician Arenig stage [4-6], which is ~480 Ma according to the 2002 update of the ISC.

# References

1. JE Almond: The Silurian-Devonian fossil record of the Myriapoda. *Phil Trans R Soc Lond B* 1985, 309:227-237.

2. WA Shear, PA Selden: Rustling in the undergrowth: animals in early terrestrial ecosystems. In: *Plants invade the land* Edited by PG Gensel, D Edwards. pp. 29-51. New York: Columbia University Press; 2001: 29-51.

3. JEA Marshall: Palynology af the Stonehaven group, Scotland: evidence for a mid-Silurian age and its geological implications. *Geol Mag* 1991, 128:283-286.

4. JA Dunlop, PA Selden: The early history and phylogeny of the chelicerates. In: *Arthropod relationships* Edited by RA Fortey, RH Thomas. pp. 221-235. London: Chapman & Hall; 1998: 221-235.

5. MJ Benton: The Fossil Record 2, 1 edn. London: Chapman and Hall; 1993.

6. LI Anderson, PA Selden: Opisthosomal fusion and phylogeny of Palaeozoic Xiphosura. *Lethaia* 1997, 30:19-31.
